# Supplementary material for: Development of the Tailored Rett Intervention and Assessment Longitudinal (TRIAL) database and the Rett Evaluation of Symptoms and Treatments (REST) Questionnaire
Source: PubMed Central journal article supplement — BMJ Open. 2017 Jun 21;7(6):e015342. doi: 10.1136/bmjopen-2016-015342 (PMC5734452; doi:10.1136/bmjopen-2016-015342), 2017-06-21
Supplement: bmjopen-2016-015342.draft_revisions.pdf [file bmjopen-2016-015342.draft_revisions.pdf]

# BMJ Open

## Protocol for the Development and Validation of a Questionnaire to assess the Rett Evaluation of Symptoms and Treatments (REST) Questionnaire

|                                 |                                                                                                                                                                                                                                                                                                                                                                                                                                                                                                                                                                                                                                                                                                                                               |
|---------------------------------|-----------------------------------------------------------------------------------------------------------------------------------------------------------------------------------------------------------------------------------------------------------------------------------------------------------------------------------------------------------------------------------------------------------------------------------------------------------------------------------------------------------------------------------------------------------------------------------------------------------------------------------------------------------------------------------------------------------------------------------------------|
| Journal:                        | <i>BMJ Open</i>                                                                                                                                                                                                                                                                                                                                                                                                                                                                                                                                                                                                                                                                                                                               |
| Manuscript ID                   | bmjopen-2016-015342                                                                                                                                                                                                                                                                                                                                                                                                                                                                                                                                                                                                                                                                                                                           |
| Article Type:                   | Protocol                                                                                                                                                                                                                                                                                                                                                                                                                                                                                                                                                                                                                                                                                                                                      |
| Date Submitted by the Author:   | 28-Nov-2016                                                                                                                                                                                                                                                                                                                                                                                                                                                                                                                                                                                                                                                                                                                                   |
| Complete List of Authors:       | Singh, Jatinder; Institute of Psychiatry, Psychology & Neuroscience, Department of Child and Adolescent Psychiatry<br>Lievesley, Kate; Institute of Psychiatry, Psychology & Neuroscience, Department of Child and Adolescent Psychiatry<br>Fiori, Federico; Institute of Psychiatry, Psychology & Neuroscience, Department of Child and Adolescent Psychiatry; Centre for Interventional Paediatric Psychopharmacology and Rare Diseases, South London and Maudsley NHS Foundation Trust<br>Santosh , Paramala; Institute of Psychiatry, Psychology & Neuroscience, Department of Child and Adolescent Psychiatry; Centre for Interventional Paediatric Psychopharmacology and Rare Diseases, South London and Maudsley NHS Foundation Trust |
| <b>Primary Subject Heading</b>: | Mental health                                                                                                                                                                                                                                                                                                                                                                                                                                                                                                                                                                                                                                                                                                                                 |
| Secondary Subject Heading:      | Paediatrics, Patient-centred medicine                                                                                                                                                                                                                                                                                                                                                                                                                                                                                                                                                                                                                                                                                                         |
| Keywords:                       | Child & adolescent psychiatry < PSYCHIATRY, Protocols & guidelines < HEALTH SERVICES ADMINISTRATION & MANAGEMENT, MENTAL HEALTH                                                                                                                                                                                                                                                                                                                                                                                                                                                                                                                                                                                                               |
|                                 |                                                                                                                                                                                                                                                                                                                                                                                                                                                                                                                                                                                                                                                                                                                                               |

SCHOLARONE™  
Manuscripts

1  
2  
3 **Protocol for the Development and Validation of a Questionnaire**  
4  
5  
6 **to assess the Rett Evaluation of Symptoms and Treatments**  
7  
8  
9 **(REST) Questionnaire**  
10

11  
12  
13  
14 Singh J<sup>1</sup>, Lievesley K<sup>1,3</sup>, Fiori F<sup>1,2,3</sup>, Santosh P<sup>1,2,3</sup>  
15  
16

17  
18 **Affiliations:**  
19

20 <sup>1</sup>Department of Child and Adolescent Psychiatry, King's College London, London, UK  
21

22 <sup>2</sup>Centre for Interventional Paediatric Psychopharmacology and Rare Diseases, South London  
23  
24 and Maudsley NHS Foundation Trust, London, UK  
25

26  
27 <sup>3</sup>HealthTracker Ltd, Gillingham, Kent, United Kingdom  
28  
29

30 **Corresponding author:**  
31

32 Dr Paramala Santosh,  
33

34 Centre for Interventional Paediatric Psychopharmacology and Rare Diseases (CIPPRD)  
35

36 Research Team,  
37

38 4 Windsor Walk, Denmark Hill,  
39

40 London SE5 8BB,  
41

42 United Kingdom  
43  
44

45 E-mail: [paramala.1.santosh@kcl.ac.uk](mailto:paramala.1.santosh@kcl.ac.uk)  
46  
47

48  
49 **Key Words**  
50

51 Biomarkers; HealthTracker<sup>TM</sup>; Questionnaire Development and Validation; Rett Syndrome;  
52

53 Tailored Rett Intervention and Assessment Longitudinal (TRIAL) database; Wearable Sensor  
54

55 Technology  
56  
57  
58  
59  
60

## Abstract

**Introduction:** Rett Syndrome (RTT) is a pervasive neurodevelopmental disorder that presents with deficits in brain functioning leading to language and learning regression, characteristic hand stereotypies and developmental delay. RTT has divergent symptomatology and its clinical heterogeneity belies the premise that individuals with RTT should be treated using a generic treatment plan. What is needed is a single, multidimensional questionnaire that embraces all symptoms, and the relationships between them, that can capture clinically meaningful data across the lifespan in individuals with RTT. This standalone questionnaire will be used for signposting areas for better practice. The new outcome measure will also be able to marry with the physiological aspects of the disease obtained using wearable sensor technology as well as genetic and psychosocial data to stratify patients. Taken together, this will empower clinicians and researchers with the confidence to delineate between different aspects of disorder symptomatology in order to streamline treatment pathways for individuals or for those patients entering clinical trials. This protocol describes the anticipated development and validation of the Rett Evaluation of Symptoms and Treatments (REST) questionnaire, which when linked with the outcomes of the wearable sensor technology, will serve as a barometer for longitudinal patient monitoring and improve treatment pathways in patients with RTT.

**Methods and Analysis:** The United States (US) Food and Drug Administration (FDA) Guidance for Patient-reported Outcome Measures (PROM) will be used as a template to inform the methodology of the study. It will follow an iterative framework that will include item/concept identification, item/concept elicitation in parent/carer mediated focus groups, expert clinician feedback, web based presentation of questionnaires, initial scale development, cognitive interviews, instrument refinement and instrument validation.

1  
2  
3 **Ethics and dissemination:** The study has received favourable opinion from the NHS  
4  
5 Research Ethics Committee (REC): NHS Research Ethics Committee (REC) – London,  
6  
7 Bromley Research Ethics Committee (reference: 15/LO/1772).  
8  
9  
10  
11  
12  
13  
14  
15  
16  
17  
18  
19  
20  
21  
22  
23  
24  
25  
26  
27  
28  
29  
30  
31  
32  
33  
34  
35  
36  
37  
38  
39  
40  
41  
42  
43  
44  
45  
46  
47  
48  
49  
50  
51  
52  
53  
54  
55  
56  
57  
58  
59  
60

For peer review only

### Strengths and Limitations of the Study:

Strengths of this Study are:

- It will follow the FDA framework for Patient Reported Outcome Measures.
- The new questionnaire will correlate behavioural data with the physiological aspects of the disease.
- It will gather feedback from parent-based charities such as Reverse Rett UK.
- The new questionnaire will capture clinically meaningful change of symptomatology in individuals with RTT across the lifespan.
- It will enable the streamlining of treatment and expedite triaging of care by signposting patients to correct specialists sooner to enable timely intervention.
- The use of HealthTracker™, a multi-modal eHealth web-based monitoring platform, will make the questionnaire as user friendly as possible and allows it to be tailored to individual participant.

Limitation of this Study:

- A limitation is that the questionnaire battery will be completed remotely so the extent to which participants feel comfortable using the Internet and computers may affect completion rates.

## Introduction

Rett Syndrome (RTT) can trace its genesis to a clinical waiting room in Vienna (1965)<sup>1</sup> where Dr. Rett first observed the clinical signs and symptoms of RTT. Symptoms usually appear between 6 to 18 months after birth<sup>2</sup> and clinically RTT presents with impairments in brain functioning leading to language and learning regression, hand stereotypies (hand washing/wringing) and developmental stagnation. RTT is predominantly found in young females with an incidence of about 1: 10,000 live births<sup>3</sup> and so far 57 cases of RTT have been documented in males<sup>4</sup>. The prevalence is underscored by the high clinical variability of the disease and hence the frequency could be underestimated. Loss of function in the methyl-CpG binding protein 2 (*MeCP2*) gene is responsible for the disorder in the vast majority of cases<sup>5</sup>, with rarer cases being attributed to mutations in *CDKL5* and *FOXP1* gene<sup>6,7</sup>. More recently, mutations in other less known candidate genes have emerged such as those encoding ankyrin repeat proteins and neuronal acetylcholine receptor subunits<sup>8</sup>. *MeCP2* is a highly conserved nuclear protein in the mammalian brain<sup>9</sup> and notably the disorder is reversible in mice models of RTT<sup>10</sup> and in *MECP2* duplication syndrome<sup>11</sup>.

*MeCP2* acts as a critical epigenetic modulator in the mammalian brain, controlling overlapping mechanisms such as DNA methylation and post-translational mechanisms<sup>12</sup>. Through differential post-translational modification at serine 164<sup>13</sup>, *MeCP2* may help in limiting transcriptional noise<sup>14</sup> of other genes. For example, mutations in the gene *switch-insensitive 3 family member A (SIN3A)*, a *MeCP2* interactor and transcriptional repressor – crucial for cortical integrity, causes intellectual disability and ASD<sup>15</sup> and the *MeCP2*<sup>R306C</sup> mutation prevents *MeCP2* from interacting with the NCoR/histone deacetylase 3 (HDAC3) complex resulting in impediments in social and cognitive functioning in animal models<sup>16</sup>. *MeCP2* has complex genome level modalities, and the general opinion is that loss of *MeCP2* impacts other genes crucial for post-natal neuronal development. This seems to be the

1  
2  
3 significant driver for the classical RTT clinical phenotype. Genes in neuronal development  
4  
5 tend to be long (100 kb or larger)<sup>17</sup> and as the transcriptional repression function of MeCP2 is  
6  
7 biased towards longer genes<sup>18</sup>, it is likely that impairments of long genes associated with  
8  
9 neuronal development dictates the functional and developmental versatility of MeCP2 seen in  
10  
11 RTT. This has a knock-on effect on the homeostasis of excitatory and inhibitory  
12  
13 pathways<sup>19,20</sup> in RTT brains leading to the clinical versatility that is commonly observed.

14  
15 MECP2 being an X-linked gene, has an impact on the phenotype of RTT patients and the  
16  
17 clinical severity. The X chromosome inactivation can cause uneven expression of wild type  
18  
19 and mutant alleles resulting in skewed patterns of RTT phenotype severity<sup>21,22</sup>, and the degree  
20  
21 of DNA-methylation-dependent long gene repression<sup>18</sup>. The range of severity in RTT is  
22  
23 therefore broad and ranges from lethal neonatal encephalopathy to milder forms (where  
24  
25 symptoms are less severe); hence assessment and treatment must be individually tailored to  
26  
27 each affected person.  
28  
29  
30

### 31 *Pre-existing measures in RTT*

32  
33 As far as we are aware, no complete all-embracing instrument has been developed for  
34  
35 individuals with RTT that has the ability to capture longitudinal pharmacological,  
36  
37 behavioural, genetic and psychosocial information, as well as an ability to correlate this with  
38  
39 the physiological aspects of the disease. At present there are no datasets or instruments that  
40  
41 provide such information. Previous datasets/instruments have been inconsistent and provide  
42  
43 limited information on the behavioural and physiological facets of the disease. Whilst, some  
44  
45 might provide information on the genetic diagnoses of individuals with RTT, there is a lack  
46  
47 of consistency. First, RettBase, collected mainly molecular genetic data from the Australian  
48  
49 cohort of RTT patients<sup>23</sup>. Some other instruments have included both genetic and clinical  
50  
51 data, although the clinical data was limited. InterRETT, an Australian Rett syndrome  
52  
53 database, was based on data collection by distributing a questionnaire to families<sup>24</sup>. The  
54  
55  
56  
57  
58  
59  
60

1  
2  
3 Italian Rett Database and Biobank consisted of 357 patients and had 20 structured and seven  
4  
5 descriptive clinical items along with 17 structured genetic items<sup>25</sup>. The British Isles Rett  
6  
7 Syndrome Survey, included 275 British Rett patients and had 271 structured and 94  
8  
9 descriptive clinical items, and six structured genetic items<sup>26</sup>. An American survey collected  
10  
11 data on the natural history of the disease that allowed researchers and physicians to access  
12  
13 comprehensive patient data<sup>27</sup>. These datasets were preserved and integrated into the Rett  
14  
15 Networked Database<sup>26</sup> and offers an amalgamated data repository for researchers to access  
16  
17 anonymized patient information. Elsewhere, the Japanese RTT database (JRDB) includes the  
18  
19 clinical data from 102 females with a median age of 11 years old<sup>28</sup>.

22  
23 Large cross-sectional studies investigating the genotype-phenotype relationships have  
24  
25 revealed divergence in the phenotype seen in individuals with RTT<sup>29</sup>. Certain deletions  
26  
27 dictate a more severe phenotype when it comes to motor abilities<sup>29,30</sup> and cardio-respiratory  
28  
29 phenotypes<sup>31</sup>. This has paved the way for specific questionnaires to be developed and  
30  
31 validated such as the Rett Syndrome Gross Motor Scale<sup>32</sup> to measure the gross motor abilities  
32  
33 in individuals with RTT and a modified version of the International Scoring System<sup>33</sup> in RTT  
34  
35 to assess the clinical impact of the common symptoms. Whilst these instruments have their  
36  
37 merits and would be invaluable for pinpointing specific outcomes in RTT such as gross motor  
38  
39 deficits and cardio-respiratory function, they are limited in their scope and have not been  
40  
41 evaluated for capturing clinically meaningful change of key symptomatology longitudinally.  
42  
43 Moreover, as autonomic dysfunction does not appear to be governed by any specific mutation  
44  
45 in RTT<sup>31</sup>, assessing the autonomic dysfunction in individuals in RTT is a pressing clinical  
46  
47 concern.  
48  
49

51  
52 Autonomic dysfunction is a pivotal factor that requires consideration when managing patients  
53  
54 with rare disorders such as RTT. From a clinical perspective, this situation is often found in  
55  
56 treatment non-responders and those with significant functional disability. Autonomic  
57  
58  
59  
60



1  
2  
3 dysfunction co-occurs in the context of emotional and behavioural dysregulation, and  
4  
5 recently using wearable sensor technology, we have shown that Emotional, Behavioural and  
6  
7 Autonomic Dysregulation (EBAD) is a crucial factor that needs to be considered when  
8  
9 managing patients with RTT<sup>34,35</sup>. Although autonomic dysfunction has been investigated in  
10  
11 individuals with RTT<sup>36-39</sup>, the progression of autonomic dysfunction and the developmental  
12  
13 trajectory of EBAD has never been researched. Moreover, the components of EBAD in an all  
14  
15 encompassing questionnaire that can map across other symptomatology longitudinally in  
16  
17 individuals with RTT has not previously been shown.  
18  
19

## 20 21 **Aim**

22  
23 The objective of this protocol is to develop and validate a comprehensive multi-system  
24  
25 questionnaire (Rett Evaluation of Symptoms and Treatments – REST questionnaire) that can  
26  
27 profile the symptomatology of patients with RTT by capturing clinically meaningful data  
28  
29 across the lifespan allowing better understanding of patient needs. In parallel, information  
30  
31 collected using wearable sensor technology<sup>34,35</sup> will be linked to data obtained from the  
32  
33 REST questionnaire, genetic data and also information about available psychosocial support  
34  
35 from the patient and their family, to form a comprehensive Tailored Rett Intervention and  
36  
37 Assessment Longitudinal (TRIAL) database. Using the data obtained from the new REST  
38  
39 questionnaire, physiological measurements (using wearable sensor technology), genetic and  
40  
41 clinically derived psychosocial support data, the TRIAL database will streamline treatment  
42  
43 approaches to expedite triaging of care by signposting patients to correct specialists earlier  
44  
45 than is currently happening (Figure 1). Specifically, the functionality of the multi-modal  
46  
47 HealthTracker™ platform will be exploited so that the data from the TRIAL database can be  
48  
49 used to develop a parent/carer alert system to signal when it may be useful to request  
50  
51 unscheduled clinician appointments. Using this functionality, the TRIAL database will also  
52  
53  
54  
55  
56  
57  
58  
59  
60

1  
2  
3 be able to stratify patients to inform adaptive clinical trial design, by allowing pre-existing  
4 datasets to be used so that rare disease trials can be done in a more cost-effective manner.  
5  
6

### 7 **Methods and Analyses**

8  
9 The title of this questionnaire was based on the feedback of the focus groups involving  
10 parents and carers of children with RTT from the parent based charities such as Reverse Rett  
11 UK, and clinician feedback. It will incorporate elements from previous scales<sup>32,33</sup> and  
12 standardised RTT questionnaires – data from the Natural History Study<sup>40</sup>, Rett Syndrome  
13 Behaviour Questionnaire (RSBQ)<sup>41</sup> and the modified version of the Rett Syndrome Severity  
14 Scale (RSSS)<sup>42</sup>. It is anticipated that the questionnaire will not take more than 30 minutes to  
15 complete.  
16  
17  
18  
19  
20  
21  
22  
23

24 The United States (US) Food and Drug Administration (FDA) Guidance for Patient-reported  
25 Outcome Measures (PROM)<sup>43</sup> will be used as a template to guide the methodology in the  
26 study. It was described in Santosh *et al.* (2016)<sup>44</sup> and will follow an iterative framework that  
27 will involve item/concept identification, item/concept elicitation in parent/carer mediated  
28 focus groups, clinician feedback, web based presentation of questionnaires initial scale  
29 development, cognitive interviews, instrument refinement and instrument validation.  
30  
31  
32  
33  
34  
35  
36  
37

### 38 ***Stage 1: Qualitative Development of the Rett Evaluation of Symptoms and Treatment*** 39 ***(REST) questionnaire***

#### 40 ***Concept identification***

41  
42 For this initial phase, a systematic literature review will be conducted according to the  
43 “Preferred Reporting Items for Systematic Reviews and Meta-Analyses (PRISMA)<sup>45</sup> to  
44 identify signs and symptoms that are deemed to be problematic in RTT. A draft version will  
45 be reviewed by expert clinicians who have substantial experience in RTT and Autism  
46 Spectrum Disorder (ASD). Common themes will be identified and draft version of the  
47 questionnaire will be prepared based on their feedback.  
48  
49  
50  
51  
52  
53  
54  
55  
56  
57  
58  
59  
60

### *Concept elicitation*

This stage will involve parents/carers of individuals aged 6 months to 40 years with RTT. A series of focus groups anticipated to last about 1.5 hours will be conducted as part of the concept elicitation stage. These focus groups will include parents/carers of individuals with RTT from the parent based charities such as Reverse Rett, UK, and clinicians who see RTT patients. The groups will follow a semi-structured format using open-ended questions to allow participants to discuss their experiences and views. Some of the focus groups will be on item generation whilst others may centre on reviewing draft versions of the questionnaire identifying pertinent themes. Focus groups will be audio recorded and each group will include approximately 4-6 parents of children with RTT. Up to two researchers may be present for the focus groups, which will be led by a Consultant Child and Adolescent Psychiatrist/Specialist. All participants will also be asked to complete a demographic questionnaire.

### *Web based presentation of questionnaires on the HealthTracker™ platform*

HealthTracker™, a web-based health monitoring platform<sup>46</sup>, has been successfully trialed in multi-centric European Union FP7 studies<sup>47,48</sup> and also in a questionnaire development and validation study<sup>49</sup>. Parents and carers will be shown how the REST questionnaire might appear on the HealthTracker™ platform, how the response options to the questionnaire could be presented (i.e. Likert scale or slider bar) and whether a choice of single or multiple choice questions would be appropriate. The various views of the focus groups will be used to choose the most optimal web-based visualization of the questionnaire.

### *Tool review*

As far as the authors are aware, no questionnaire exists that not only is RTT focused but can capture a broad range of problematic themes, for example, the developmental trajectory of EBAD. Nor do these existing questionnaires/scales attempt to marry this with the

1  
2  
3 physiological measurements from the wearable sensor technology. At this stage, a further  
4 literature review will be conducted to identify any themes that may have been missed during  
5 the focus groups and whether any further areas of RTT symptomatology that were not  
6 highlighted in the focus groups needs to be addressed. In addition, parents/carers from  
7 Reverse Rett, UK, will be consulted and any feedback incorporated into the tool review stage.

#### 14 *Cognitive interviews*

15  
16 Following the focus groups, study participants will be sent a copy of the draft version of the  
17 questionnaire (via email or post). Once this part has been completed, a draft operating beta  
18 version of the questionnaire will be finalised.

#### 22 ***Stage 2: Validation of the Rett Evaluation of Symptoms and Treatments (REST)*** 23 ***questionnaire***

24  
25  
26  
27 This stage of the study will involve parents/carers of individuals aged 6 months to 40 years  
28 with RTT. Questionnaires to assess the longitudinal trajectory of symptomatology in rare  
29 diseases have proven to be difficult to validate<sup>50,51</sup>. To broach this conundrum, it is important  
30 to focus on the symptoms and not just the clinical diagnosis, and be able to evaluate the  
31 symptom level across other comparable patient groups. RTT is associated with a high  
32 penetrance of ASD and at the neuronal level share many salient features<sup>52</sup>. Both RTT and  
33 ASD exhibit deficits in social behaviour and speech and in both cases individuals may share  
34 common stereotypical behaviours<sup>53</sup>. Due to these similarities and based on consultation with  
35 clinicians with expertise in ASD, as a comparator group, this stage of the study will also  
36 include parents/carers/partners of individuals aged 6 months to 40 years with ASD with  
37 significant intellectual disability. It will also involve clinicians who see patients with RTT  
38 and ASD who will test the clinician version of the questionnaire. Participants (parents/carers  
39 and clinicians) will be recruited to complete the respective versions of the Rett Evaluation of  
40 Symptoms and Treatments (REST) questionnaire as well as other standardised questionnaires  
41  
42  
43  
44  
45  
46  
47  
48  
49  
50  
51  
52  
53  
54  
55  
56  
57  
58  
59  
60

1  
2  
3 – namely the RSSS and the RSBQ (Table 1). The RSSS<sup>42,54</sup> and the RSBQ<sup>41,42,55</sup> have  
4  
5 previously been used in studies with RTT patients. Pertinent information will also be taken  
6  
7 from the RTT Natural History Study<sup>40</sup>. It is anticipated that 25 participants in the RTT cohort  
8  
9 and 25 in the ASD with significant intellectual disability cohort will complete the  
10  
11 questionnaire battery. Although there is significant symptom overlap in patients with RTT  
12  
13 and ASD, participants in the ASD cohort will be asked to complete only the relevant  
14  
15 questions in the questionnaire battery that would be applicable and relevant to them.  
16  
17

18 The questionnaire battery will be presented to study participants in HealthTracker<sup>TM</sup>, a multi-  
19  
20 modal web-based portal for remote online completion using developmentally appropriate  
21  
22 interfaces. Participants will be given a unique ID number and log-in information and will be  
23  
24 asked to complete the questionnaires independently. The research team will be able to  
25  
26 support participants with questionnaire completion should they need it. Where applicable,  
27  
28 participants will also be able to complete paper versions of the questionnaires if they request  
29  
30 them. Participant medical records will be accessed only by members of the study team to  
31  
32 validate the questionnaire against details of diagnoses obtained from patient case notes as  
33  
34 well as against the Development and Well-being Assessment (DAWBA)<sup>56</sup>, and  
35  
36 treatment/medication status if they are available in case notes. Patient records will also be  
37  
38 used to gain genetic information on the specific mutation and diagnosis. Consent will be  
39  
40 obtained to access medical notes.  
41  
42

43  
44  
45 All participants will be asked to complete the questionnaire battery, at baseline, again after 1  
46  
47 week and then between 4 and 6 months after first completion to assess questionnaire stability.  
48

### 49 ***Stage 3: Wearable Sensor Technology***

50  
51 The use of wearable sensor technology to improve treatment outcomes has gathered  
52  
53 momentum in recent years<sup>57</sup> and is currently being used to develop new outcome measures in  
54  
55 patients with complex neurodisability such as Amyotrophic Lateral Sclerosis<sup>58</sup>. We have  
56  
57  
58  
59  
60

1  
2  
3 shown that wearable sensor technology can assist in the management of EBAD in individuals  
4  
5 with rare and complex genetic disorders<sup>59</sup>, such as RTT<sup>34,35</sup>, to assist in improving treatment  
6  
7 outcomes. In the context of this study, the outcomes of the wearable sensor technology will  
8  
9 marry into the outcomes of the newly developed questionnaire (REST), with psychosocial  
10  
11 and genetic data to create the TRIAL database. The technology will be evaluated in  
12  
13 individuals with RTT, ASD and healthy controls.  
14

### 15 ***Sample size***

#### 16 *Justification for Sample Size*

17  
18 Owing to the small sample population of individuals with rare and complex genetic disorders,  
19  
20 formal modelling to obtain sample size estimates will not be readily applicable. In this view,  
21  
22 focus groups will be used to understand the nature of the problem and the acceptability of  
23  
24 various measures and their presentation to potential research participants. The qualitative  
25  
26 modification and new development of the questionnaire will be done by running focus groups  
27  
28 and the sample size was calculated based on the requirements needed for field testing.  
29  
30  
31  
32  
33

#### 34 *Stage 1: Questionnaire Development Stage*

35  
36 It is anticipated that the total number of participants for the questionnaire development stage  
37  
38 of the study will be between 10-20 (including participants and clinicians).  
39  
40

#### 41 *Stage 2: Questionnaire Validation Stage*

42  
43 The total number of participants for the questionnaire validation stage of the study will be 50  
44  
45 participants (25 RTT cohort and 25 ASD cohort).  
46  
47

#### 48 *Stage 3: Wearable Sensor Technologies Stage*

49  
50 The total number of participants for the wearable technology stage of the study is expected to  
51  
52 be similar as those who participated in the validation phase of the study. This part of the  
53  
54 study will also include a matched healthy control group.  
55

#### 56 *Stage 4: Longitudinal monitoring in RTT patients*

1  
2  
3 Longitudinal data capture on a 3 monthly basis from 80 - 100 parents/carers of individuals  
4  
5 with RTT will be undertaken using the REST questionnaire over a 12-18 month period.  
6  
7 Ethics submission for stage 4 of the study will be done after stages 1-3 have been completed.  
8

### 9 10 ***Recruitment***

11 Information sheets (and age appropriate information sheets where relevant) will be provided  
12  
13 for all participants, in addition to consent forms. Information sheets will emphasise that  
14  
15 participant involvement in the research is voluntary and they have the right to withdraw from  
16  
17 the research at any time, without giving a reason. In addition, participants will be advised that  
18  
19 participating or withdrawing from the research will have no impact on their usual care that  
20  
21 they are currently receiving, or will receive in the future. A minimum of 24 hours will be  
22  
23 given between providing study information and recruitment of participants into the study.  
24  
25  
26

### 27 ***Stage 1: Questionnaire Development Stage Recruitment***

28  
29 Parents/carers of individuals with RTT and clinicians who work with individuals with RTT  
30  
31 will be recruited. Due to the group-based nature of the focus groups, parents/carers or  
32  
33 clinicians who have not provided consent will not be able to partake in focus groups and will  
34  
35 be excluded. The focus groups will comprise of parents/carers of individuals with RTT and  
36  
37 clinicians working with patients with RTT. Depending on the nature of the focus groups  
38  
39 about 4-6 participants will take part in each focus group.  
40  
41  
42

### 43 ***Questionnaire Development Stage - Inclusion Criteria***

- 44
- 45 • Parents/carers/partners/relatives of individuals aged 6 months to 40 years with  
46  
47 RTT.
  - 48  
49 • Clinicians who work within healthcare settings in South London and Maudsley  
50  
51 (SLaM) NHS Foundation Trust that see children and/or adults with RTT and  
52  
53 associated developmental conditions.
  - 54  
55 • Without any exclusion for concurrent stable medication.  
56  
57  
58  
59  
60

1  
2  
3 *Questionnaire Development Stage - Exclusion Criteria*  
4

- 5 • Parents/carers whom do not have a reasonable level of English. This is because a  
6 reasonable level of English will be required to engage in the focus groups.  
7  
8

9  
10 ***Stage 2: Questionnaire Validation Stage Recruitment***

11 For this stage of the study, parents/carers of individuals with RTT and those with ASD will  
12 be recruited via clinician/researcher invite. Study participants will be under the care of a  
13 service within SLaM NHS Foundation Trust. Where relevant,  
14 parents/carers/partners/relatives of individuals with RTT and ASD will be asked to provide  
15 details of their clinician at the time of consent so that they can also be contacted by the  
16 research team and invited to take part.  
17  
18  
19  
20  
21  
22  
23  
24

25 *Questionnaire Validation Stage - Inclusion Criteria*  
26

- 27 • Parents/carers of individuals aged 6 months to 40 years with RTT or ASD.  
28  
29

30 *Questionnaire Validation Stage - Exclusion Criteria*  
31

- 32 • If parents/carers of individuals aged 6 months to 40 years with RTT or ASD are not  
33 able to (or expected to not be able to) complete questionnaires they will be excluded  
34 from the study.  
35  
36  
37  
38 • Parents/carers who do not have a reasonable level of English will be excluded from  
39 the validation stage of the study. This is because a reasonable level will be required to  
40 complete questionnaires which will only be available in English at the validation  
41 stage. A research assistant may assist the Parent/carer in completion.  
42  
43  
44  
45  
46  
47

48 ***Stage 3: Wearable Sensor Technologies Stage Recruitment***

49 Individuals aged between 5 to 40 years with RTT and ASD, and  
50 parents/carers/partners/relatives of individuals with RTT and ASD will be recruited via  
51 clinician/researcher invite. Information sheets (and age appropriate information sheets where  
52 relevant) will be provided for all participants, in addition to consent forms and where  
53  
54  
55  
56  
57  
58  
59  
60



1  
2  
3 applicable assent forms. Healthy controls will be recruited via clinician/researcher invite  
4  
5 using widely used and appropriate advertising channels.  
6

7 *Wearable Sensor Technologies Stage - Inclusion Criteria*  
8

9  
10 RTT

- 11 • Females aged 5 - 40 years with confirmed diagnosis of RTT (via  
12 clinician/researcher invite).  
13
- 14 • Parents/carers/partners/relatives of individuals aged 5 - 40 years with RTT.  
15  
16  
17

18 ASD

- 19 • Males and females aged 5 - 40 years with ASD (via clinician/researcher invite).  
20  
21
- 22 • Parents/carers/partners/relatives of individuals aged 5 - 40 years with ASD.  
23  
24  
25  
26

27 Healthy Controls

- 28 • Males and females aged 5 - 40 years considered to be healthy for their age (via  
29 clinician/researcher invite).  
30  
31
- 32 • Are capable of understanding and complying with the requirements of the  
33 protocol.  
34  
35  
36  
37

38 *Wearable Sensor Technologies Stage - Exclusion Criteria*  
39

40 RTT

- 41 • Individuals aged 5 - 40 years with RTT who are not able to (or expected to not be  
42 able to) wear the wearable sensor technology will be excluded from the study.  
43  
44
- 45 • Parents/carers/partners/relatives of individuals aged 5 - 40 years with RTT who do  
46 not have a reasonable level of English.  
47  
48  
49  
50

51 ASD

- 52 • Individuals aged 5 - 40 years with ASD who are not able to (or expected to not be  
53 able to) wear the sensor technology will be excluded from the study.  
54  
55  
56  
57  
58  
59  
60

- Parents/carers/partners/relatives of individuals aged 5 - 40 years with ASD who do not have a reasonable level of English.

#### Healthy Controls

- Individuals who are not able to (or expected to not be able to) wear the sensor technology will be excluded from the study.
- Individuals who do not have a reasonable level of English.

### **Analyses Plan**

#### ***Questionnaire Development***

Data obtained from the focus groups will be recorded securely and transcribed accurately, paying close attention to the identified themes and issues. The analysis will be performed as described previously<sup>44</sup>. In brief, the focus group data will be organised into clinically meaningful themes using thematic and content analysis. Following this, to manage the qualitative data generated from the focus groups, NVivo software will be used and the data analysis will be guided by the framework for thematic analysis<sup>60</sup>.

#### ***Questionnaire Validation***

The quantitative data will be analysed using the latest version of the SPSS statistical package (IBM SPSS Statistics for Windows. Armonk, NY: IBM Corp.).

#### ***Internal Consistency***

Internal consistency of the measures will be reported using Cronbach's alpha. Alpha coefficients  $\geq 0.85$  will be indicative of reasonable evidence of internal reliability<sup>61</sup>. Where applicable, 'alpha if deleted analyses' will be performed to see if omitting any item(s) from the (subthemes of the) questionnaire would strengthen the measure.

#### ***Test-retest reliability***

1  
2  
3 Intra-class correlation (ICC) will be used to assess test-retest reliability on subscale and total  
4 scores as described<sup>62</sup>. Given the exploratory nature of this study, weighted Cohen's kappa  
5 values will also be determined to assess test-retest reliability at the item level. The ICC will  
6 also be performed after 4 to 6 months after initial completion of the questionnaire to assess  
7 the long term stability of the new questionnaire.  
8  
9

### 10 11 12 13 *Validity*

14  
15  
16 Validity (discriminative power) of the new questionnaire will be assessed using Receiver  
17 Operating Characteristic (ROC) analyses as described in Santosh et al. (2016)<sup>44</sup>. As there are  
18 no gold standard questionnaires for patients with RTT, where applicable the ROC analyses  
19 will also be performed on the scores on the RTT Natural History Study<sup>40</sup>, the RSBQ<sup>41</sup> and the  
20 RSSS<sup>42</sup>. Where necessary and if data are available, ANOVA (general linear model) will be  
21 performed with grouping variable DAWBA diagnoses (coded in 1 for positive and coded 0  
22 for negative diagnosis) so that the differences in REST scoring can be assessed.  
23  
24  
25  
26  
27  
28  
29  
30  
31

### 32 33 *Factor analysis*

34  
35 Studies involving small sample sizes have often been plagued by the inappropriate use of  
36 Exploratory Factor Analysis (EFA) or Principal Component Analysis (PCA) to identify  
37 clinically meaningful factor items<sup>63</sup>. Many recommendations have been put forward  
38 regarding sample sizes but there does not seem to be an overall consensus<sup>64</sup>. Some have  
39 suggested improbable sample sizes that would not be feasible for studies of rare and complex  
40 genetic diseases<sup>65</sup>. In these instances, methods to reveal the multi-dimensional aspects of  
41 factor structure are not as straightforward. Recently, the Regularized Exploratory Factor  
42 Analysis (REFA) was introduced<sup>66</sup> that is recommended over EFA and PCA, when samples  
43 sizes are less than 50. Despite this new approach, it is unclear whether the REFA would be  
44 applicable for a multidimensional questionnaire in a condition with many variables. In the  
45 context of the new questionnaire, the robustness of the REST will be evaluated using tools  
46  
47  
48  
49  
50  
51  
52  
53  
54  
55  
56  
57  
58  
59  
60

1  
2  
3 applicable for smaller samples sizes<sup>66</sup> and those used in exploratory studies as described  
4  
5 recently<sup>67</sup>.  
6  
7

## 8 9 **Dissemination**

10  
11 The goal of this study is to develop and validate a new RTT questionnaire. The REST  
12  
13 questionnaire will reduce the burden and improve the overall healthcare delivery of  
14  
15 individuals with RTT and when coupled with the data from the wearable sensor technology  
16  
17 as well as psychosocial and genetic information will be used to construct the TRIAL  
18  
19 database. Using the functionality of the HealthTracker<sup>TM</sup> platform the TRIAL database will  
20  
21 provide all the necessary information to clinicians and researchers about different aspects of  
22  
23 the disease and serve as a barometer for improving treatment pathways in individuals. This  
24  
25 will allow algorithms to be developed alerting parent/carers to request unscheduled clinician  
26  
27 appointments when symptoms deviate significantly from one another thereby streamlining  
28  
29 the patient care pathway. Rare disorders such as RTT have a limited patient population and it  
30  
31 is therefore crucial for patients to be stratified using phenotype and biomarkers (such as those  
32  
33 obtained through wearable sensor monitoring). Adaptive clinical trial design using Bayesian  
34  
35 methodology has been suggested to augment the statistical power and decrease the number of  
36  
37 patients required for a rare disease trial<sup>51</sup>. In this view, the TRIAL database will serve for the  
38  
39 recruitment of patients into clinical trials as baseline information would already be available  
40  
41 so the clinical trial can be conducted with fewer patients and in a more cost-effective manner.  
42  
43 Results stemming from this study will be disclosed unreservedly and the findings published  
44  
45 in scientific journals and will also be presented in meetings and conferences for professionals,  
46  
47 patients as well as carers and families. Reverse Rett UK will lead on wider dissemination of  
48  
49 the applied research findings to engage policy-makers, key professional groups and service  
50  
51 managers, and parents/carers of children with RTT.  
52  
53  
54  
55  
56  
57  
58  
59  
60

## Funding

We thank Reverse Rett UK for funding this research study (Ref No: PCCTABR)

## Author Contributions

JS drafted, wrote the manuscript, and wrote the documentation required for ethical approval of the study. KL provided important intellectual review of the manuscript and reviewed the documentation required for ethical approval of the study. FF reviewed the statistical components and reviewed the manuscript. PS secured funding and conceived the study, and revised the manuscript critically for important intellectual content.

## Acknowledgements

We are indebted to Reverse Rett UK for their helpful comments and suggestions on the study design.

## Conflicts of Interest

PS is the co-inventor of the HealthTracker™ and is a Director and shareholder in HealthTracker Ltd. FF is a Data Analyst and KL is a Project Manager employed by HealthTracker Ltd respectively.

JS is on the Professional Advisory Board for Reverse Rett UK and acts as a Scientific Advisor.

## References

1. Rett A. (1966). On a unusual brain atrophy syndrome in hyperammonemia in childhood. *Wiener Medizinische Wochenschrift*. 116: 723–726.
2. Zoghbi HY. (2016). Rett Syndrome and the Ongoing Legacy of Close Clinical Observation. *Cell*. 167: 293-297.
3. Neul JL, Kaufmann WE, Glaze DG. et al. (2010). Rett syndrome: revised diagnostic criteria and nomenclature. *Ann. Neurol*. 68: 944-50.
4. Reichow B, George-Puskar A, Lutz T. et al. (2015). Brief report: systematic review of Rett syndrome in males. *J. Autism Dev. Disord*. 45: 3377-83.
5. Bienvenu T, Carrie A, de Roux N. et al. (2000). MECP2 mutations account for most cases of typical forms of Rett syndrome. *Human Molecular Genetics*. 9: 1377-84.
6. Evans JC, Archer HL, Colley JP et al. (2005). Early onset seizures and Rett-like features associated with mutations in CDKL5. *European Journal of Human Genetics*. 13: 1113–1120.
7. Philippe C, Amsallem D, Francannet C. et al. (2010). Phenotypic variability in Rett syndrome associated with FOXP1 mutations in females. *Journal of Medical Genetics*. 47: 59–65.
8. Lucariello M, Vidal E, Vidal S. et al. (2016). Whole exome sequencing of Rett syndrome-like patients reveals the mutational diversity of the clinical phenotype. *Hum. Genet*. 135: 1343-1354.
9. Lewis JD, Meehan RR, Henzel WJ. et al. (1992). Purification, sequence, and cellular localization of a novel chromosomal protein that binds to methylated DNA. *Cell*. 69: 905-14.
10. Guy J, Gan J, Selfridge J. et al. (2007). Reversal of neurological defects in a mouse model of Rett syndrome. *Science*. 315: 1143-7.
11. Sztainberg Y, Chen HM, Swann JW. et al. (2015). Reversal of phenotypes in MECP2 duplication mice using genetic rescue or antisense oligonucleotides. *Nature*. 528: 123-6.

- 1  
2  
3 12. Katz DM, Bird A, Coenraads M. et al. (2016). Rett Syndrome: Crossing the Threshold to  
4 Clinical Translation. *Trends Neurosci.* 39: 100-13.  
5  
6  
7 13. Stefanelli G, Gandaglia A, Costa M. et al. (2016). Brain phosphorylation of MeCP2 at  
8 serine 164 is developmentally regulated and globally alters its chromatin association. *Sci.*  
9 *Rep.* 2016 Jun 21; 6:28295.  
10  
11  
12 14. Skene PJ, Illingworth RS, Webb S. et al. (2010). Neuronal MeCP2 is expressed at near  
13 histone-octamer levels and globally alters the chromatin state. *Mol. Cell.* 37: 457-68.  
14  
15  
16 15. Witteveen JS, Willemsen MH, Dombroski TC. et al. (2016). Haploinsufficiency of  
17 MeCP2-interacting transcriptional co-repressor SIN3A causes mild intellectual disability by  
18 affecting the development of cortical integrity. *Nat Genet.* 2016 Jul 11:1-11.  
19  
20  
21 16. Nott A, Cheng J, Gao F. et al. (2016). Histone deacetylase 3 associates with MeCP2 to  
22 regulate FOXO and social behavior. *Nat. Neurosci.* 19: 1497-1505.  
23  
24  
25 17 Zylka MJ, Simon JM, Philpot BD. (2015). Gene length matters in neurons. *Neuron.* 286:  
26 353-5.  
27  
28  
29 18. Gabel HW, Kinde B, Stroud H. et al. (2015). Disruption of DNA-methylation-dependent  
30 long gene repression in Rett syndrome. *Nature.* 522: 89-93.  
31  
32  
33 19. Meng X, Wang W, Lu H. et al. (2016). Manipulations of MeCP2 in glutamatergic  
34 neurons highlight their contributions to Rett and other neurological disorders. *Elife.* 21; 5. pii:  
35 e14199.  
36  
37  
38 20. Ure K, Lu H, Wang W. et al. (2016). Restoration of Mecp2 expression in GABAergic  
39 neurons is sufficient to rescue multiple disease features in a mouse model of Rett Syndrome.  
40 *Elife.* 21; 5. pii: e14198.  
41  
42  
43 21. Gibson JH, Williamson SL, Arbuckle S & Christodoulou J. (2005). X chromosome  
44 inactivation patterns in brain in Rett syndrome: Implications for the disease phenotype. *Brain*  
45 *Development.* 27: 266–270.  
46  
47  
48  
49  
50  
51  
52  
53  
54  
55  
56  
57  
58  
59  
60

- 1  
2  
3 22. Xinhua B, Shengling J, Fuying S, Hong P, Meirong L. & Wu XR. (2008). X chromosome  
4 inactivation in Rett Syndrome and its correlations with MECP2 mutations and phenotype.  
5 Journal of Child Neurology. 23: 22–25.  
6  
7  
8  
9 23. Christodoulou J, Grimm A, Maher T, Bennetts B. RettBASE. (2003). The IRSA MECP2  
10 variation database-a new mutation database in evolution. Hum. Mutat. 21: 466-72.  
11  
12  
13 24. Louise S, Fyfe S, Bebbington A. et al. (2009). InterRett, a model for international data  
14 collection in a rare genetic disorder. Research in Autism Spectrum Disorders. 2009 3(3).  
15  
16  
17 25. Sampieri K, Meloni I, Scala E. et al. (2007). Italian Rett database and biobank. Human  
18 Mutation. 28: 329-35.  
19  
20  
21  
22 26. Grillo E, Villard L, Clarke A, et al. (2012). Rett networked database: an integrated  
23 clinical and genetic network of Rett syndrome databases. Human Mutation. 33: 1031-6.  
24  
25  
26 27. Percy AK, Lane JB, Childers J et al. (2007). Rett syndrome: North American database.  
27 Journal Child Neurology. 22: 1338-41.  
28  
29  
30  
31 28. Itoh M, Saikusa T, Tanioka T. et al. (2016). A study of Methyl-CpG Binding Protein 2  
32 mutations and locomotion ability; Consideration from Japanese Rett Syndrome Database.  
33 Rett Syndrome – RTT50.1. Wiener Medizinische Wochenschrift 11-12.  
34  
35  
36 29. Bebbington A, Anderson A, Ravine D et al. (2008). Investigating genotype-phenotype  
37 relationships in Rett syndrome using an international data set. Neurology. 70: 868–75.  
38  
39  
40 30. Neul JL, Fang P, Barrish J. (2008), et al. Specific mutations in methyl-CpG-binding  
41 protein 2 confer different severity in Rett syndrome. Neurology. 70 (16 Part 1):1313–21.  
42  
43  
44 31. Halbach N, Smeets EE, Julu P. et al. (2016). Neurophysiology versus clinical genetics in  
45 Rett syndrome: A multicenter study. Am. J. Med .Genet A. 170: 2301-9.  
46  
47  
48 32. Downs J, Stahlhut M, Wong K. et al. (2016). Validating the Rett Syndrome Gross Motor  
49 Scale. PLoS One. 11: e0147555.  
50  
51  
52  
53  
54  
55  
56  
57  
58  
59  
60



- 1  
2  
3 33. Kerr AM, Nomura Y, Armstrong D. et al. (2001). Guidelines for reporting clinical  
4 features in cases with MECP2 mutations. *Brain Dev.* 23: 208-1.  
5  
6  
7 34. Singh J and Santosh P (2016). Psychopharmacology of Neurodevelopmental Disorders in  
8 Children in *Child and Adolescent Psychiatry: Asian Perspectives*. Edition 1, Springer.  
9 Nature.  
10  
11  
12  
13 35. Santosh PJ, Bell L, Lievesley K, Singh J, Fiori F (2016). Paradoxical Physiological  
14 Responses to Propranolol in a Rett Syndrome Patient: A Case Report. *BMC Paediatrics* (in  
15 press).  
16  
17  
18  
19  
20 36. Julu PO, Kerr AM, Hansen S. et al. (1997). Functional evidence of brain stem immaturity  
21 in Rett syndrome. *Eur. Child Adolesc. Psychiatry.* 6 Suppl 1: 47-54.  
22  
23  
24 37. Julu PO, Kerr AM, Apartopoulos F. et al. (2001). Characterisation of breathing and  
25 associated central autonomic dysfunction in the Rett disorder. *Arch Dis. Child.* 85: 29–37.  
26  
27  
28 38. Julu PO & Witt Engerstrom I. (2005). Assessment of the maturity-related brainstem  
29 functions reveals the heterogeneous phenotypes and facilitates clinical management of Rett  
30 syndrome. *Brain & Development.* 27 (Suppl. 1): S43–S53.  
31  
32  
33 39. Julu PO, Engerström IW, Hansen S (2008). Cardiorespiratory challenges in Rett's  
34 syndrome. *Lancet.* 371: 1981-3.  
35  
36  
37 40. Neul JL, Lane JB, Lee HS et al. (2014). Developmental delay in Rett syndrome: data  
38 from the natural history study. *J. Neurodev. Disord.* 6: 20.  
39  
40  
41 41. Mount RH, Charman T, Hastings RP. et al (2002). The Rett Syndrome Behaviour  
42 Questionnaire (RSBQ): refining the behavioural phenotype of Rett syndrome. *Journal of*  
43 *Child Psychology and Psychiatry.* 43: 1099–110.  
44  
45  
46 42. Kaufmann WE, Tierney E, Rohde CA. et al. (2012). Social impairments in Rett  
47 syndrome: characteristics and relationship with clinical severity. *Journal Intellectual*  
48 *Disability Research.* 56 (3), 233-47.  
49  
50  
51  
52  
53  
54  
55  
56  
57  
58  
59  
60

- 1  
2  
3 43. US Department of Health and Human Services Food and Drug Administration. Guidance  
4 for industry: patient-reported outcome measures: use in medical product development to  
5 support labelling claims. Secondary Guidance for industry: patient-reported outcome  
6 measures: use in medical product development to support labelling claims. 2009.  
7 <http://www.fda.gov/downloads/Drugs/GuidanceComplianceRegulatoryInformation/Guidance>  
8 [s/UCM193282.pdf](http://www.fda.gov/downloads/Drugs/GuidanceComplianceRegulatoryInformation/Guidance)  
9  
10  
11  
12  
13  
14  
15  
16 44. Santosh P, Tarver J, Gibbons F. et al. (2016). Protocol for the development and validation  
17 of a questionnaire to assess concerning behaviours and mental health in individuals with  
18 autism spectrum disorders: the Assessment of Concerning Behaviour (ACB) scale. *BMJ*  
19 *Open*. 6: e010693.  
20  
21  
22  
23  
24  
25 45. Liberati A, Altman DG, Tetzlaff J. et al. (2009). The PRISMA statement for reporting  
26 systematic reviews and meta-analyses of studies that evaluate health care interventions:  
27 explanation and elaboration. *Annals of Internal Medicine*. 151: W-65.  
28  
29  
30  
31  
32 46. <https://www.healthtracker.co.uk>  
33  
34 47. Santosh P. STOP study aims to monitor suicidality. (2014) *EU Research* 36–39.  
35  
36 48. [http://cordis.europa.eu/project/rcn/110200\\_en.html](http://cordis.europa.eu/project/rcn/110200_en.html)  
37  
38 49. Santosh P, Gringras P, Baird G. et al. (2015). Development and psychometric properties  
39 of the parent version of the Profile of Neuropsychiatric Symptoms (PONS) in children and  
40 adolescents. *BMC Pediatrics* 15: 62.  
41  
42  
43  
44 50, Lilford RJ, Thornton JG, Braunholtz D. (1995). Clinical trials and rare diseases: a way  
45 out of a conundrum. *BMJ* 311: 1621–1625.  
46  
47  
48  
49 51. Hampson LV, Whitehead J, Eleftheriou D. et al. (2015). Elicitation of expert prior  
50 opinion: application to the MYPAN trial in childhood polyarteritis nodosa. *PLoS One*. 30;  
51 10: e0120981.  
52  
53  
54  
55  
56  
57  
58  
59  
60

- 1  
2  
3 52. Theoharides TC, Athanassiou M, Panagiotidou S, Doyle R. (2015). Dysregulated brain  
4 immunity and neurotrophin signaling in Rett syndrome and autism spectrum disorders. *J.*  
5  
6 *Neuroimmunol.* 279: 33-8.  
7  
8  
9  
10 53. Neul, J.L. The relationship of Rett syndrome and MECP2 disorders to autism. (2012).  
11 *Dialogues Clin. Neurosci.* 14, 253–262.  
12  
13  
14 54. Carter JC, Lanham DC, Pham D. et al. (2008). Selective cerebral volume reduction in  
15 Rett syndrome: a multiple-approach MR imaging study. *AJNR Am. J Neuroradiol.* 29: 436-  
16  
17 41.  
18  
19  
20  
21 55. Robertson L, Hall SE, Jacoby P. et al. (2006). The association between behavior and  
22 genotype in Rett syndrome using the Australian Rett Syndrome Database. *Am. J. Med.*  
23 *Genet. B. Neuropsychiatr. Genet.* 141B: 177-83.  
24  
25  
26  
27 56. Goodman R, Ford T, Richards H. et al. (2000). The Development and Well-Being  
28 Assessment: description and initial validation of an integrated assessment of child and  
29 adolescent psychopathology. *J. Child Psychol. Psychiatry* 41: 645–55.  
30  
31  
32  
33  
34 57. <http://www.proteus.com/>  
35  
36  
37 58. <https://clinicaltrials.gov/ct2/show/NCT02447952>  
38  
39 59. Santosh PJ, Bell L, Fiori F, Singh J. (2016). Pediatric Antipsychotic Use and Outcomes  
40 Monitoring. *J. Child Adolesc. Psychopharmacol.* 2016 Sep 8.  
41  
42  
43 60. Braun V. & Clarke V. (2006). Using thematic analysis in psychology. *Qualitative*  
44 *Research in Psychology.* 3: 77-101.  
45  
46  
47 61. Portney LG, Watkins MP. (2009). *Foundations of clinical research: Applications to*  
48 *practice.* 3rd ed. Upper Saddle River, N.J.: Pearson/Prentice Hall.  
49  
50  
51  
52 62. Weir JP. (2005). Quantifying test-retest reliability using the intraclass correlation  
53 coefficient and the SEM. *Journal of Strength and Conditioning Research / National Strength*  
54 *& Conditioning Association.* 19: 231–40.  
55  
56  
57  
58  
59  
60

- 1  
2  
3 63. MacCallum RC. & Austin JT. (2000). Applications of structural equation modeling in  
4 psychological research. *Annual Review of Psychology*. 51, 201–226.  
5  
6  
7 64. de Winter JCF, Dodou, D and. Wieringa PA (2009). Exploratory Factor Analysis with  
8 small sample sizes. *Multivariate Behavioral Research*. 44: 147–181.  
9  
10  
11 65. Rouquette A. & Falissard B. (2011). Sample size requirements for the internal validation  
12 of psychiatric scales. *International Journal of Methods in Psychiatric Research*. 20: 235-249.  
13  
14  
15 66. Jung S & Soonmook K. (2011). Exploratory factor analysis for small samples. *Behaviour*  
16  
17  
18  
19  
20 Res. 43: 701-709.  
21  
22 67. Vindras P, Desmurget M, Baraduc P. (2012). When One Size Does Not Fit All: A Simple  
23  
24  
25  
26  
27  
28  
29  
30  
31  
32  
33  
34  
35  
36  
37  
38  
39  
40  
41  
42  
43  
44  
45  
46  
47  
48  
49  
50  
51  
52  
53  
54  
55  
56  
57  
58  
59  
60

Figure 1: Flow diagram illustrating the sequence of steps showing how data obtained from the TRIAL database can be used to provide timely intervention to streamline treatment outcomes in patients with RTT syndrome

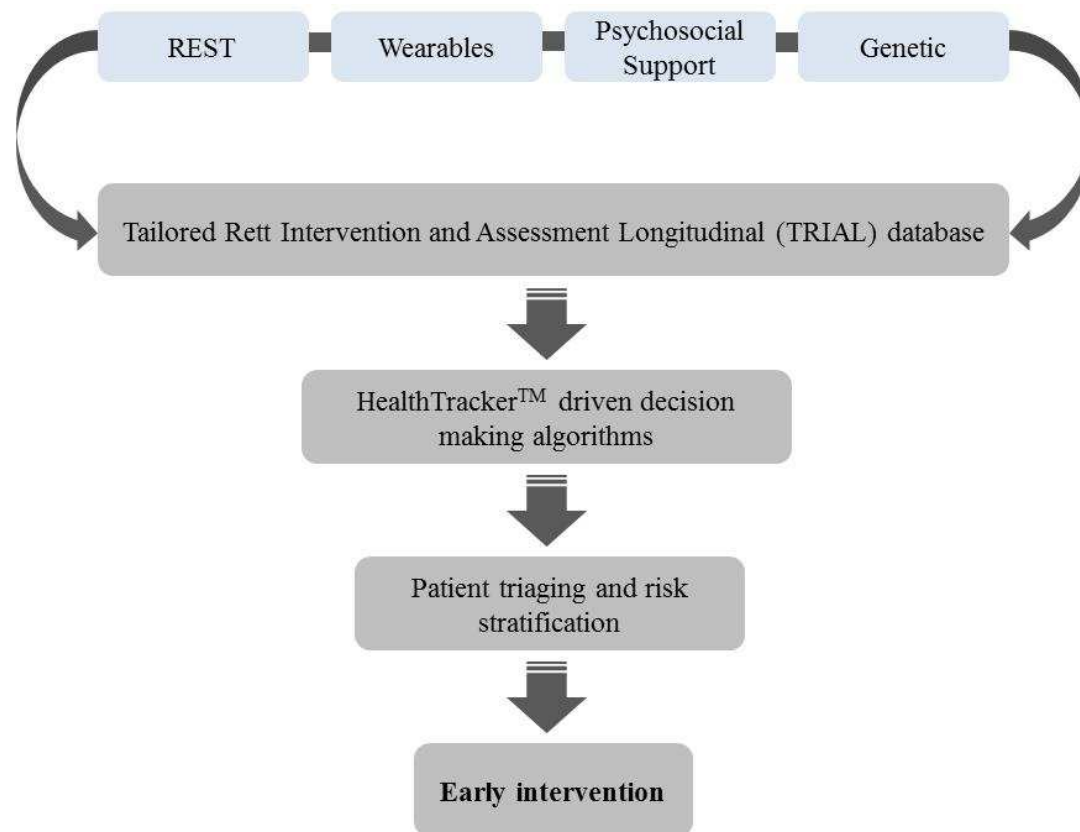

Abbreviations: REST (Rett Evaluation of Symptoms and Treatments) questionnaire; RTT (Rett Syndrome); TRIAL (Tailored Rett Intervention and Assessment Longitudinal) database

Notes:

The term 'wearables' has been coined for wearable sensor technology

Genetic and psychosocial information will be captured as part of the REST questionnaire

Table 1: Measures to be administered during Stage 2 (Validation) and Stage 3 (Wearable Sensor Technology) of the Study

| Measure                                                         | Key Information                                                                                                                                                                                                                                                                                                                                       | Administered to:    |                     |                  |                                     |                                             |                      |
|-----------------------------------------------------------------|-------------------------------------------------------------------------------------------------------------------------------------------------------------------------------------------------------------------------------------------------------------------------------------------------------------------------------------------------------|---------------------|---------------------|------------------|-------------------------------------|---------------------------------------------|----------------------|
|                                                                 |                                                                                                                                                                                                                                                                                                                                                       | Individual with RTT | Individual with ASD | Healthy Subjects | Parent/Carer of Child with RTT/*ASD | Parent/Carer/Partner of Adult with RTT/*ASD | Clinician/Researcher |
| Rett Natural History study <sup>40</sup>                        | 542 individuals with classical RTT and 96 with atypical RTT provide information on clinical severity of RTT                                                                                                                                                                                                                                           |                     |                     |                  |                                     |                                             | X                    |
| Rett Syndrome Behavioural Questionnaire (RSBQ) <sup>41</sup>    | Provides an accurate measure of the behavioural features of RTT                                                                                                                                                                                                                                                                                       |                     |                     |                  | X                                   | X                                           |                      |
| Rett Syndrome Severity Score (RSSS) <sup>42</sup>               | Provides information on the overall clinical severity and severity across individual parameters: <ul style="list-style-type: none"> <li>• frequency and manageability of seizures;</li> <li>• respiratory abnormalities</li> <li>• scoliosis;</li> <li>• ability to walk;</li> <li>• hand use;</li> <li>• speech;</li> <li>• sleep hygiene</li> </ul> |                     |                     |                  | X                                   | X                                           |                      |
| Rett Evaluation of Symptoms and Treatments (REST) questionnaire | TBC                                                                                                                                                                                                                                                                                                                                                   |                     |                     |                  | X                                   | X                                           | X                    |
| Wearable Sensor Technology                                      | TBC                                                                                                                                                                                                                                                                                                                                                   | X                   | X                   | X                |                                     |                                             |                      |
| Anticipated Administration Time (minutes)                       |                                                                                                                                                                                                                                                                                                                                                       | 30                  | 30                  | 30               | ~60                                 | ~60                                         | ~60                  |

\* Participants in the ASD cohort will be asked to complete only the relevant questions in the questionnaire battery that would be applicable and relevant to them  
Abbreviations: ASD (Autism Spectrum Disorder); REST (Rett Evaluation of Symptoms and Treatments) questionnaire; RSBQ (Rett Syndrome Behavioural Questionnaire); RSSS (Rett Syndrome Severity Score); RTT (Rett Syndrome)

# BMJ Open

## Protocol for the Development and Validation of the Rett Evaluation of Symptoms and Treatments (REST) Questionnaire

|                                 |                                                                                                                                                                                                                                                                                                                                                                                                                                                                                                                                                                                                                                                                                                                                               |
|---------------------------------|-----------------------------------------------------------------------------------------------------------------------------------------------------------------------------------------------------------------------------------------------------------------------------------------------------------------------------------------------------------------------------------------------------------------------------------------------------------------------------------------------------------------------------------------------------------------------------------------------------------------------------------------------------------------------------------------------------------------------------------------------|
| Journal:                        | <i>BMJ Open</i>                                                                                                                                                                                                                                                                                                                                                                                                                                                                                                                                                                                                                                                                                                                               |
| Manuscript ID                   | bmjopen-2016-015342.R1                                                                                                                                                                                                                                                                                                                                                                                                                                                                                                                                                                                                                                                                                                                        |
| Article Type:                   | Protocol                                                                                                                                                                                                                                                                                                                                                                                                                                                                                                                                                                                                                                                                                                                                      |
| Date Submitted by the Author:   | 07-Mar-2017                                                                                                                                                                                                                                                                                                                                                                                                                                                                                                                                                                                                                                                                                                                                   |
| Complete List of Authors:       | Singh, Jatinder; Institute of Psychiatry, Psychology & Neuroscience, Department of Child and Adolescent Psychiatry<br>Lievesley, Kate; Institute of Psychiatry, Psychology & Neuroscience, Department of Child and Adolescent Psychiatry<br>Fiori, Federico; Institute of Psychiatry, Psychology & Neuroscience, Department of Child and Adolescent Psychiatry; Centre for Interventional Paediatric Psychopharmacology and Rare Diseases, South London and Maudsley NHS Foundation Trust<br>Santosh , Paramala; Institute of Psychiatry, Psychology & Neuroscience, Department of Child and Adolescent Psychiatry; Centre for Interventional Paediatric Psychopharmacology and Rare Diseases, South London and Maudsley NHS Foundation Trust |
| <b>Primary Subject Heading</b>: | Mental health                                                                                                                                                                                                                                                                                                                                                                                                                                                                                                                                                                                                                                                                                                                                 |
| Secondary Subject Heading:      | Paediatrics, Patient-centred medicine                                                                                                                                                                                                                                                                                                                                                                                                                                                                                                                                                                                                                                                                                                         |
| Keywords:                       | Child & adolescent psychiatry < PSYCHIATRY, Protocols & guidelines < HEALTH SERVICES ADMINISTRATION & MANAGEMENT, MENTAL HEALTH                                                                                                                                                                                                                                                                                                                                                                                                                                                                                                                                                                                                               |
|                                 |                                                                                                                                                                                                                                                                                                                                                                                                                                                                                                                                                                                                                                                                                                                                               |

SCHOLARONE™  
Manuscripts

# Protocol for the Development and Validation of the Rett Evaluation of Symptoms and Treatments (REST) Questionnaire

Singh J<sup>1</sup>, Lievesley K<sup>1,3</sup>, Fiori F<sup>1,2,3</sup>, Santosh P<sup>1,2,3</sup>

## Affiliations:

<sup>1</sup>Department of Child and Adolescent Psychiatry, King's College London, London, UK

<sup>2</sup>Centre for Interventional Paediatric Psychopharmacology and Rare Diseases, South London  
and Maudsley NHS Foundation Trust, London, UK

<sup>3</sup>HealthTracker Ltd, Gillingham, Kent, United Kingdom

## Corresponding author:

Dr Paramala Santosh,

Centre for Interventional Paediatric Psychopharmacology and Rare Diseases (CIPPRD)

Research Team,

4 Windsor Walk, Denmark Hill,

London SE5 8BB,

United Kingdom

E-mail: [paramala.1.santosh@kcl.ac.uk](mailto:paramala.1.santosh@kcl.ac.uk)

## Key Words

Biomarkers; HealthTracker<sup>TM</sup>; Questionnaire Development and Validation; Rett Syndrome;  
Tailored Rett Intervention and Assessment Longitudinal (TRIAL) database; Wearable Sensor  
Technology



## Abstract

**Introduction:** Rett Syndrome (RTT) is a pervasive neurodevelopmental disorder that presents with deficits in brain functioning leading to language and learning regression, characteristic hand stereotypies and developmental delay. Different mutations in the gene implicated in RTT - methyl-CpG-binding protein 2 (*MECP2*) establishes RTT as a disorder with divergent symptomology ranging from individuals with severe to milder phenotypes. A reliable and single multidimensional questionnaire is needed that can embrace all symptoms, and the relationships between them, and can map clinically meaningful data to symptomatology across the lifespan in RTT patients. This standalone questionnaire will be used for signposting areas for better practice. The questionnaire will also be able to marry with the physiological aspects of the disease obtained using wearable sensor technology as well as genetic and psychosocial data to stratify patients. Taken together, this will empower clinicians and researchers with the confidence to delineate between different aspects of disorder symptomatology in order to streamline care pathways for individuals or for those patients entering clinical trials. This protocol describes the anticipated development and validation of the Rett Evaluation of Symptoms and Treatments (REST) questionnaire, which when linked with the outcomes of the wearable sensor technology, will serve as a barometer for longitudinal patient monitoring in patients with RTT.

**Methods and Analysis:** The United States (US) Food and Drug Administration (FDA) Guidance for Patient-reported Outcome Measures (PROM) will be used as a template to inform the methodology of the study. It will follow an iterative framework that will include item/concept identification, item/concept elicitation in parent/carer mediated focus groups, expert clinician feedback, web based presentation of questionnaires, initial scale development, instrument refinement and instrument validation.

1  
2  
3  
4  
5  
6  
7  
8  
9  
10  
11  
12  
13  
14  
15  
16  
17  
18  
19  
20  
21  
22  
23  
24  
25  
26  
27  
28  
29  
30  
31  
32  
33  
34  
35  
36  
37  
38  
39  
40  
41  
42  
43  
44  
45  
46  
47  
48  
49  
50  
51  
52  
53  
54  
55  
56  
57  
58  
59  
60

**Ethics and dissemination:** The study has received favourable opinion from the NHS Research Ethics Committee (REC): NHS Research Ethics Committee (REC) – London, Bromley Research Ethics Committee (reference: 15/LO/1772).

For peer review only

## Strengths and Limitations of the Study:

Strengths of this Study are:

- It will follow the FDA framework for Patient Reported Outcome Measures.
- The new questionnaire will correlate behavioural data with the physiological aspects of the disease.
- It will gather feedback from parent-based charities such as Reverse Rett UK.
- The new questionnaire will capture clinically meaningful change of symptomatology in individuals with RTT across the lifespan.
- It will enable the streamlining of treatment and expedite triaging of care by signposting patients to correct specialists sooner to enable timely intervention.
- The use of HealthTracker™, a multi-modal eHealth web-based monitoring platform, will make the questionnaire as user friendly as possible and allows it to be tailored to individual participant.

Limitation of this Study:

- A limitation is that the questionnaire battery will be completed remotely so the extent to which participants feel comfortable using the Internet and computers may affect completion rates.
- Participation might be time consuming for families.

## Introduction

Rett Syndrome (RTT) can trace its genesis to a clinical waiting room in Vienna (1965)<sup>1</sup> where Dr. Rett first observed the clinical signs and symptoms of RTT. Symptoms usually appear between 6 to 18 months after birth<sup>2</sup> and clinically RTT presents with impairments in brain functioning leading to language and learning regression, hand stereotypies (hand washing/wringing) and developmental stagnation. RTT is predominantly found in young females with an incidence of about 1: 10,000 live births<sup>3</sup>. There are geographical variations<sup>4</sup> with one Australian study indicating a prevalence of about 1:9000<sup>5</sup>. The prevalence is probably underscored by the high clinical variability of the disease and hence the frequency could be underestimated. Loss of function in the methyl-CpG binding protein 2 (*MECP2*) gene is responsible for the disorder in the vast majority of cases<sup>6</sup>, with rarer cases being attributed to mutations in *CDKL5* and *FOXG1* gene<sup>7,8</sup> leading to atypical or variant RTT. More recently, mutations in other less known candidate genes have emerged such as those encoding ankyrin repeat proteins and neuronal acetylcholine receptor subunits<sup>9</sup>. MeCP2 is a highly conserved nuclear protein abundant in the mammalian brain<sup>10</sup> and notably the disorder is reversible in mice models of RTT<sup>11</sup>.

MeCP2 acts as a critical epigenetic modulator in the mammalian brain, controlling overlapping mechanisms such as DNA methylation and post-translational mechanisms<sup>12</sup>. Through differential post-translational modification at serine 164<sup>13</sup>, MeCP2 may help in limiting transcriptional noise<sup>14</sup> of other genes. For example, mutations in the gene *switch-insensitive 3 family member A (SIN3A)*, a *MECP2* interactor and transcriptional repressor – crucial for cortical integrity, causes intellectual disability and ASD<sup>15</sup> and the *MECP2*<sup>R306C</sup> mutation prevents MeCP2 from interacting with the NCoR/histone deacetylase 3 (HDAC3) complex resulting in impediments in social and cognitive functioning in animal models<sup>16</sup>. *MeCP2* has complex genome level modalities, and the general opinion is that loss of the

1  
2  
3 transcriptional repressor function of *MECP2* impacts other genes crucial for post-natal  
4 neuronal development and has led others to suggest that this leads to a sub-optimal brain<sup>17</sup>.  
5  
6 This seems to be the significant driver for the classical RTT clinical phenotype. Genes in  
7 neuronal development tend to be long (100 kb or larger)<sup>18</sup> and as the transcriptional  
8 repression function of *MECP2* is biased towards longer genes<sup>19</sup>, it is likely that impairments  
9 of long genes associated with neuronal development dictates the functional and  
10 developmental versatility of the MeCP2 protein seen in RTT. This has a knock-on effect on  
11 the homeostasis of excitatory and inhibitory pathways<sup>20,21</sup> in RTT brains leading to the  
12 clinical versatility that is commonly observed.  
13  
14  
15  
16  
17  
18  
19  
20  
21

22 *MECP2* being an X-linked gene, has an impact on the phenotype of RTT patients and the  
23 clinical severity. The X chromosome inactivation can cause uneven expression of wild type  
24 and mutant alleles resulting in skewed patterns of RTT phenotype severity<sup>22,23</sup>, and the degree  
25 of DNA-methylation-dependent long gene repression<sup>19</sup>. The range of functional ability in  
26 RTT patients is therefore broad and depending upon the type of genetic mutation ranges from  
27 patients with severe functional impairments to those with milder symptoms<sup>24</sup>; hence  
28 assessment and care pathways must be individually tailored to each affected person.  
29  
30  
31  
32  
33  
34  
35  
36

37 Although there have been considerable advances in understanding the genetics and into the  
38 genetic testing of RTT, the diagnosis of RTT is based on the 2010 revised consensus clinical  
39 criteria<sup>3</sup> (see Table 1 in Neul et al., 2010) and recommends that all individuals with RTT  
40 should be first be assessed according to the revised clinical criteria followed by a thorough  
41 genetic test for *MECP2*. Given that about 3-5% of RTT individuals who fulfil the diagnostic  
42 clinical criteria do not have *MECP2* mutations, and this is even higher for atypical RTT  
43 cases<sup>25</sup>, more recently clinical predictors that can facilitate a clinician's decision making to  
44 order genetic testing for RTT have been provided<sup>26</sup>. This showed that the likelihood of a  
45 having a positive *MECP2* test was greatest in patients with partial or complete attenuation of  
46  
47  
48  
49  
50  
51  
52  
53  
54  
55  
56  
57  
58  
59  
60

1  
2  
3 hand skills. Impairments in gait and hand stereotypies were also strong predictors. Of interest  
4 was that loss of speech did not discriminate whether an individual was *MECP2+* or *MECP2-*.

5  
6  
7 *Pre-existing measures in RTT*

8  
9 As far as we are aware, no complete instrument has been developed for individuals with RTT  
10 that has the ability to capture longitudinal pharmacological, behavioural, genetic and  
11 psychosocial information, as well as an ability to correlate this with the physiological aspects  
12 of the disease. Previous datasets/instruments have been inconsistent and provide limited  
13 information on the behavioural and physiological facets of the disease. Whilst, some might  
14 provide information on the genetic diagnoses of individuals with RTT, there is a lack of  
15 consistency. First, RettBase, collected mainly molecular genetic data from the Australian  
16 cohort of RTT patients<sup>27</sup>. Some other instruments have included both genetic and clinical  
17 data, although the clinical data was limited. InterRETT, an Australian Rett syndrome  
18 database, was based on data collection by distributing a questionnaire to families<sup>28</sup>. The  
19 Italian Rett Database and Biobank consisted of 357 patients and had 20 structured and seven  
20 descriptive clinical items along with 17 structured genetic items<sup>29</sup>. The British Isles Rett  
21 Syndrome Survey, included 275 British Rett patients and had 271 structured and 94  
22 descriptive clinical items, and six structured genetic items<sup>30</sup>. An American survey collected  
23 data on the natural history of the disease that allowed researchers and physicians to access  
24 comprehensive patient data on more than 1000 individuals with RTT<sup>31,32</sup>. These datasets were  
25 preserved and integrated into the Rett Networked Database<sup>30</sup> and offers an amalgamated data  
26 repository for researchers to access anonymized patient information. Elsewhere, the Japanese  
27 RTT database (JRDB) includes the clinical data from 102 females with a median age of 11  
28 years old<sup>33</sup>.

29  
30  
31  
32  
33  
34  
35  
36  
37  
38  
39  
40  
41  
42  
43  
44  
45  
46  
47  
48  
49  
50  
51  
52  
53  
54  
55  
56  
57  
58  
59  
60  
61  
62  
63  
64  
65  
66  
67  
68  
69  
70  
71  
72  
73  
74  
75  
76  
77  
78  
79  
80  
81  
82  
83  
84  
85  
86  
87  
88  
89  
90  
91  
92  
93  
94  
95  
96  
97  
98  
99  
100  
101  
102  
103  
104  
105  
106  
107  
108  
109  
110  
111  
112  
113  
114  
115  
116  
117  
118  
119  
120  
121  
122  
123  
124  
125  
126  
127  
128  
129  
130  
131  
132  
133  
134  
135  
136  
137  
138  
139  
140  
141  
142  
143  
144  
145  
146  
147  
148  
149  
150  
151  
152  
153  
154  
155  
156  
157  
158  
159  
160  
161  
162  
163  
164  
165  
166  
167  
168  
169  
170  
171  
172  
173  
174  
175  
176  
177  
178  
179  
180  
181  
182  
183  
184  
185  
186  
187  
188  
189  
190  
191  
192  
193  
194  
195  
196  
197  
198  
199  
200  
201  
202  
203  
204  
205  
206  
207  
208  
209  
210  
211  
212  
213  
214  
215  
216  
217  
218  
219  
220  
221  
222  
223  
224  
225  
226  
227  
228  
229  
230  
231  
232  
233  
234  
235  
236  
237  
238  
239  
240  
241  
242  
243  
244  
245  
246  
247  
248  
249  
250  
251  
252  
253  
254  
255  
256  
257  
258  
259  
260  
261  
262  
263  
264  
265  
266  
267  
268  
269  
270  
271  
272  
273  
274  
275  
276  
277  
278  
279  
280  
281  
282  
283  
284  
285  
286  
287  
288  
289  
290  
291  
292  
293  
294  
295  
296  
297  
298  
299  
300  
301  
302  
303  
304  
305  
306  
307  
308  
309  
310  
311  
312  
313  
314  
315  
316  
317  
318  
319  
320  
321  
322  
323  
324  
325  
326  
327  
328  
329  
330  
331  
332  
333  
334  
335  
336  
337  
338  
339  
340  
341  
342  
343  
344  
345  
346  
347  
348  
349  
350  
351  
352  
353  
354  
355  
356  
357  
358  
359  
360  
361  
362  
363  
364  
365  
366  
367  
368  
369  
370  
371  
372  
373  
374  
375  
376  
377  
378  
379  
380  
381  
382  
383  
384  
385  
386  
387  
388  
389  
390  
391  
392  
393  
394  
395  
396  
397  
398  
399  
400  
401  
402  
403  
404  
405  
406  
407  
408  
409  
410  
411  
412  
413  
414  
415  
416  
417  
418  
419  
420  
421  
422  
423  
424  
425  
426  
427  
428  
429  
430  
431  
432  
433  
434  
435  
436  
437  
438  
439  
440  
441  
442  
443  
444  
445  
446  
447  
448  
449  
450  
451  
452  
453  
454  
455  
456  
457  
458  
459  
460  
461  
462  
463  
464  
465  
466  
467  
468  
469  
470  
471  
472  
473  
474  
475  
476  
477  
478  
479  
480  
481  
482  
483  
484  
485  
486  
487  
488  
489  
490  
491  
492  
493  
494  
495  
496  
497  
498  
499  
500  
501  
502  
503  
504  
505  
506  
507  
508  
509  
510  
511  
512  
513  
514  
515  
516  
517  
518  
519  
520  
521  
522  
523  
524  
525  
526  
527  
528  
529  
530  
531  
532  
533  
534  
535  
536  
537  
538  
539  
540  
541  
542  
543  
544  
545  
546  
547  
548  
549  
550  
551  
552  
553  
554  
555  
556  
557  
558  
559  
560  
561  
562  
563  
564  
565  
566  
567  
568  
569  
570  
571  
572  
573  
574  
575  
576  
577  
578  
579  
580  
581  
582  
583  
584  
585  
586  
587  
588  
589  
590  
591  
592  
593  
594  
595  
596  
597  
598  
599  
600  
601  
602  
603  
604  
605  
606  
607  
608  
609  
610  
611  
612  
613  
614  
615  
616  
617  
618  
619  
620  
621  
622  
623  
624  
625  
626  
627  
628  
629  
630  
631  
632  
633  
634  
635  
636  
637  
638  
639  
640  
641  
642  
643  
644  
645  
646  
647  
648  
649  
650  
651  
652  
653  
654  
655  
656  
657  
658  
659  
660  
661  
662  
663  
664  
665  
666  
667  
668  
669  
670  
671  
672  
673  
674  
675  
676  
677  
678  
679  
680  
681  
682  
683  
684  
685  
686  
687  
688  
689  
690  
691  
692  
693  
694  
695  
696  
697  
698  
699  
700  
701  
702  
703  
704  
705  
706  
707  
708  
709  
710  
711  
712  
713  
714  
715  
716  
717  
718  
719  
720  
721  
722  
723  
724  
725  
726  
727  
728  
729  
730  
731  
732  
733  
734  
735  
736  
737  
738  
739  
740  
741  
742  
743  
744  
745  
746  
747  
748  
749  
750  
751  
752  
753  
754  
755  
756  
757  
758  
759  
760  
761  
762  
763  
764  
765  
766  
767  
768  
769  
770  
771  
772  
773  
774  
775  
776  
777  
778  
779  
780  
781  
782  
783  
784  
785  
786  
787  
788  
789  
790  
791  
792  
793  
794  
795  
796  
797  
798  
799  
800  
801  
802  
803  
804  
805  
806  
807  
808  
809  
810  
811  
812  
813  
814  
815  
816  
817  
818  
819  
820  
821  
822  
823  
824  
825  
826  
827  
828  
829  
830  
831  
832  
833  
834  
835  
836  
837  
838  
839  
840  
841  
842  
843  
844  
845  
846  
847  
848  
849  
850  
851  
852  
853  
854  
855  
856  
857  
858  
859  
860  
861  
862  
863  
864  
865  
866  
867  
868  
869  
870  
871  
872  
873  
874  
875  
876  
877  
878  
879  
880  
881  
882  
883  
884  
885  
886  
887  
888  
889  
890  
891  
892  
893  
894  
895  
896  
897  
898  
899  
900  
901  
902  
903  
904  
905  
906  
907  
908  
909  
910  
911  
912  
913  
914  
915  
916  
917  
918  
919  
920  
921  
922  
923  
924  
925  
926  
927  
928  
929  
930  
931  
932  
933  
934  
935  
936  
937  
938  
939  
940  
941  
942  
943  
944  
945  
946  
947  
948  
949  
950  
951  
952  
953  
954  
955  
956  
957  
958  
959  
960  
961  
962  
963  
964  
965  
966  
967  
968  
969  
970  
971  
972  
973  
974  
975  
976  
977  
978  
979  
980  
981  
982  
983  
984  
985  
986  
987  
988  
989  
990  
991  
992  
993  
994  
995  
996  
997  
998  
999  
1000

Capture of disease severity and sensitivity to change throughout the lifespan in patients are  
important elements that need to be considered when developing clinically meaningful

1  
2  
3 outcome measures. The Unified Parkinson Disease Rating Scale, (UPDRS) is a good example  
4  
5 of an outcome measure that is effective and can capture disease severity and clinically  
6  
7 meaningful change of symptoms of Parkinson's disease<sup>34</sup>. With rare diseases, the Sanfilippo  
8  
9 Behaviour Rating Scale (SBRS), a 68 item questionnaire developed using 44 families, is also  
10  
11 effective and can map the behavioural phenotype of children with Sanfilippo syndrome to  
12  
13 disease progression and/or results from treatment across the lifespan<sup>35</sup>. In RTT, the current  
14  
15 outcome measures are inadequate in their ability to capture disease severity across the  
16  
17 lifespan, although others have made significant headway in this area. The 37 item motor-  
18  
19 behavioral assessment (MBA) incorporates historical items with items from direct clinician  
20  
21 evaluations and has been used to describe clinical severity in RTT<sup>36,37</sup>, whilst the Rett  
22  
23 Syndrome Behavioral Questionnaire (RSBQ), a validated checklist, was designed to  
24  
25 differentiate individuals with RTT compared to those with severe intellectual disability<sup>38</sup>.  
26  
27 Other measures tested in RTT include the Anxiety Depression and Mood Scale (ADAMS)<sup>39</sup>,  
28  
29 the clinician based International Scoring System (ISS)<sup>40,41</sup> to evaluate the disease severity,  
30  
31 Vineland Adaptive Behaviour scale<sup>42</sup>, the 13 item Rett Clinical Severity Scale (RCSS)<sup>37,43</sup>  
32  
33 and its modified version<sup>42</sup>. Others have developed RTT specific anchors such as for the  
34  
35 Clinical Global Impression Severity (CGI-S) scale based on scores from the RCSS for  
36  
37 improved outcome measures in clinical trials<sup>44</sup>. Quality of Life (QOL) measures such as the  
38  
39 Child Health Questionnaire-P50 have also been used in RTT<sup>45</sup> including a recent Phase II  
40  
41 open label clinical trial using glatiramer acetate<sup>46</sup>. Some of these measures such as the MBA,  
42  
43 RSBQ, ADAMS and RCSS have been implemented into clinical trials to evaluate the effect  
44  
45 of Insulin-like Growth Factor (IGF-1)<sup>47</sup> or Sarizotan<sup>48</sup> in individuals with RTT, or to develop  
46  
47 a novel scoring tool (Rett Severity Score [RSS]) to assess the impact of IGF-1 treatment in  
48  
49 RTT<sup>41</sup>. Other scales such as the Mullen Scales for Early Learning used in other rare  
50  
51 disorders<sup>49</sup>, have also been adapted for use in RTT<sup>47</sup>. These measures are not without their  
52  
53  
54  
55  
56  
57  
58  
59  
60

1  
2  
3 faults. Some have suggested that the MPA can be difficult to use with some items that  
4 describe disease regression having not been validated<sup>24</sup>. This is important given that in some  
5  
6  
7  
8  
9  
10  
11  
12  
13  
14  
15  
16  
17  
18  
19  
20  
21  
22  
23  
24  
25  
26  
27  
28  
29  
30  
31  
32  
33  
34  
35  
36  
37  
38  
39  
40  
41  
42  
43  
44  
45  
46  
47  
48  
49  
50  
51  
52  
53  
54  
55  
56  
57  
58  
59  
60

faults. Some have suggested that the MPA can be difficult to use with some items that describe disease regression having not been validated<sup>24</sup>. This is important given that in some RTT patients, disease regression has been described as being transient or often goes unrecognised<sup>50</sup>. Others such as the RSBQ although are suitable to measure some aspects of behaviour such as mood and anxiety<sup>51</sup> might not be able to capture the salient features of behaviour as an outcome measure in a clinical trial in RTT patients. Furthermore, there is differing reliability of anxiety scales in RTT, with ADAMS especially its Social Avoidance subscale having the best psychometric properties in comparison to the RSBQ<sup>52</sup>. Whilst no outcome measure will be perfect, these studies have paved the way for more sensitive outcome measures to be developed such as the validated 15 item Gross Motor Scale for individuals with RTT<sup>53</sup>.

#### *Autonomic Function in RTT*

Large cross-sectional studies investigating the genotype-phenotype relationships have revealed divergence in the phenotype seen in individuals with RTT<sup>54,55</sup>. These were the first studies of sufficient sample size that bestowed important information on the genotype and phenotype relationships in RTT, and have been elegantly summarised elsewhere<sup>24</sup>. Some mutations or variants dictate a more severe phenotype when it comes to motor abilities<sup>24,54,55</sup> and cardio-respiratory phenotypes<sup>24,56</sup>. Moreover, at present it is unknown whether autonomic dysfunction is governed by any specific mutation in RTT<sup>24,56</sup>. Assessing the autonomic dysfunction in individuals in RTT is therefore a pressing clinical concern.

Autonomic dysfunction is a pivotal factor that requires consideration when managing patients with rare disorders such as RTT. From our clinical experience when managing patients in the Centre for Interventional Paediatric Psychopharmacology and Rare Diseases (CIPPRD)<sup>57</sup>, autonomic dysfunction is often found in patients who do not respond to treatment and those with significant functional disability. Autonomic dysfunction co-occurs in the context of



1  
2  
3 emotional and behavioural dysregulation, and recently using wearable sensor technology, we  
4  
5 have shown that Emotional, Behavioural and Autonomic Dysregulation (EBAD) is a crucial  
6  
7 factor that needs to be considered when managing patients with RTT<sup>58,59</sup>. Although  
8  
9 autonomic dysfunction has been investigated in individuals with RTT<sup>60-63</sup>, the progression of  
10  
11 autonomic dysfunction and the developmental trajectory of EBAD has never been researched.  
12  
13 Moreover, the components of EBAD in a questionnaire that can map across other  
14  
15 symptomatology longitudinally in individuals with RTT has not previously been shown.

### 17 18 **Aim**

19  
20 The objective of this protocol is to develop and validate a comprehensive multi-system  
21  
22 questionnaire (Rett Evaluation of Symptoms and Treatments – REST) that can profile the  
23  
24 symptomatology of patients with RTT and is sensitive to change across the lifespan allowing  
25  
26 better understanding of patient needs. In parallel, information collected using wearable sensor  
27  
28 technology<sup>58,59</sup> will be linked to data obtained from the REST questionnaire, genetic data and  
29  
30 also information about available psychosocial support from the patient and their family, to  
31  
32 form a comprehensive Tailored Rett Intervention and Assessment Longitudinal (TRIAL)  
33  
34 database. The TRIAL database will streamline treatment approaches to expedite triaging of  
35  
36 care by signposting patients to correct specialists earlier than is currently happening (Figure  
37  
38 1). Specifically, the functionality of the multi-modal HealthTracker™ platform will be  
39  
40 exploited so that anonymised data from the TRIAL database can be used to develop a  
41  
42 parent/carer alert system to signal when it may be useful to request unscheduled clinician  
43  
44 appointments. Using this functionality, the TRIAL database will also be able to stratify  
45  
46 patients to inform adaptive clinical trial design, by allowing pre-existing datasets to be used  
47  
48 so that rare disease trials can be done in a more cost-effective manner.  
49  
50  
51

### 52 53 **Methods and Analyses**

1  
2  
3 The title of this questionnaire was based on the feedback of the focus groups involving  
4 parents and carers of children with RTT from the parent based charities such as Reverse Rett  
5 UK, and clinician feedback. It will incorporate elements from previous scales<sup>40,52</sup> and  
6 standardised RTT questionnaires – data from the Natural History Study<sup>3</sup>, Rett Syndrome  
7 Behaviour Questionnaire (RSBQ)<sup>38</sup> and the modified version of the Rett Syndrome Severity  
8 Scale (RSSS)<sup>42</sup>. It is anticipated that the questionnaire will not take more than 30 minutes to  
9 complete.  
10

11  
12 The United States (US) Food and Drug Administration (FDA) Guidance for Patient-reported  
13 Outcome Measures (PROM)<sup>64</sup> will be used as a template to guide the methodology in the  
14 study. It was described in Santosh *et al.* (2016)<sup>65</sup> and will follow an iterative framework that  
15 will involve item/concept identification, item/concept elicitation in parent/carer mediated  
16 focus groups, clinician feedback, web based presentation of questionnaires initial scale  
17 development, instrument refinement and instrument validation.  
18  
19

### 20 ***Stage 1: Qualitative Development of the Rett Evaluation of Symptoms and Treatment*** 21 ***(REST) questionnaire***

#### 22 *Concept identification*

23 For this initial phase, a systematic literature review will be conducted according to the  
24 “Preferred Reporting Items for Systematic Reviews and Meta-Analyses (PRISMA)<sup>66</sup> to  
25 identify signs and symptoms that are deemed to be problematic in RTT. A draft version will  
26 be reviewed by expert clinicians who have substantial experience in RTT and Autism  
27 Spectrum Disorder (ASD). Common themes will be identified and draft version of the  
28 questionnaire will be prepared based on their feedback.  
29

#### 30 *Concept elicitation*

31 This stage will involve parents/carers of individuals aged between 6 to 40 years with RTT. A  
32 series of focus groups anticipated to last about 1.5 hours will be conducted as part of the  
33  
34  
35  
36  
37  
38  
39  
40  
41  
42  
43  
44  
45  
46  
47  
48  
49

1  
2  
3 concept elicitation stage. These focus groups will include parents/carers of individuals with  
4  
5 RTT from the parent based charities such as Reverse Rett, UK, and clinicians who see RTT  
6  
7 patients. The groups will follow a semi-structured format using open-ended questions to  
8  
9 allow participants to discuss their experiences and views. Some of the focus groups will be on  
10  
11 item generation whilst others may centre on reviewing draft versions of the questionnaire  
12  
13 identifying pertinent themes. Focus groups will be audio recorded and each group will  
14  
15 include approximately 4-6 parents of children with RTT. Up to two researchers may be  
16  
17 present for the focus groups, which will be led by a Consultant Child and Adolescent  
18  
19 Psychiatrist/Specialist. All participants will also be asked to complete a demographic  
20  
21 questionnaire.  
22  
23

#### 24 *Web based presentation of questionnaires on the HealthTracker™ platform*

25  
26 HealthTracker™, a web-based health monitoring platform<sup>67</sup>, has been successfully trialled in  
27  
28 multi-centric European Union FP7 studies<sup>68,69</sup> and also in a questionnaire development and  
29  
30 validation study<sup>70</sup>. Parents and carers will be shown how the REST questionnaire might  
31  
32 appear on the HealthTracker™ platform, how the response options to the questionnaire could  
33  
34 be presented and whether a choice of single or multiple choice questions would be  
35  
36 appropriate. The various views of the focus groups will be used to choose the most optimal  
37  
38 web-based visualization of the questionnaire.  
39  
40

#### 41 *Tool review*

42  
43 As far as the authors are aware, no questionnaire exists that not only is RTT focused but can  
44  
45 capture a broad range of problematic themes, in particular, the developmental trajectory of  
46  
47 EBAD. Nor do these existing questionnaires/scales attempt to marry this with the  
48  
49 physiological measurements from the wearable sensor technology. At this stage, a further  
50  
51 literature review will be conducted to identify any themes that may have been missed during  
52  
53 the focus groups and whether any further areas of RTT symptomatology that were not  
54  
55  
56  
57  
58  
59

1  
2  
3 highlighted in the focus groups needs to be addressed. In addition, parents/carers from  
4 Reverse Rett, UK, will be consulted and any feedback incorporated into the tool review stage.  
5  
6 Following the focus groups, study participants will be sent a copy of the draft version of the  
7 questionnaire (via email or post). Once this part has been completed, a draft operating beta  
8 version of the questionnaire will be finalised.  
9  
10  
11  
12

13 ***Stage 2: Validation of the Rett Evaluation of Symptoms and Treatments (REST)***  
14 ***questionnaire***  
15

16  
17 This stage of the study will involve parents/carers of individuals aged between 6 to 40 years  
18 with RTT. Questionnaires to assess the longitudinal trajectory of symptomatology in rare  
19 diseases have proven to be difficult to validate<sup>71,72</sup>. To broach this conundrum, it is important  
20 to focus on the symptoms and not just the clinical diagnosis, and be able to evaluate the  
21 symptom level across other comparable patient groups. At the neuronal level, the brains of  
22 RTT and ASD patients share many core features<sup>73</sup>. Both RTT and ASD exhibit behaviours  
23 that might overlap i.e. there are deficits in social behaviour and speech and in both cases  
24 individuals may share common stereotypical behaviours<sup>74</sup>. Due to these similarities and based  
25 on consultation with clinicians with expertise in ASD, as a comparator group, this stage of  
26 the study will also include parents/carers/partners of individuals aged between 6 to 40 years  
27 with ASD with significant intellectual disability. It will also involve clinicians who see  
28 patients with RTT and ASD who will test the clinician version of the questionnaire.  
29  
30 Participants (parents/carers and clinicians) will be recruited to complete the respective  
31 versions of the Rett Evaluation of Symptoms and Treatments (REST) questionnaire as well as  
32 other standardised questionnaires – namely the RSSS and the RSBQ (Table 1). The  
33 RSSS<sup>37,42,43,75</sup> and the RSBQ<sup>38,51</sup> have previously been used in studies with RTT patients.  
34  
35 Pertinent information will also be taken from the RTT Natural History Study<sup>31,32</sup>. It is  
36 anticipated that 50 participants in the RTT cohort and 50 in the ASD with significant  
37  
38  
39  
40  
41  
42  
43  
44  
45  
46  
47  
48  
49  
50  
51  
52  
53  
54  
55  
56  
57  
58  
59  
60

1  
2  
3 intellectual disability cohort will complete the questionnaire battery. Although there is  
4 significant symptom overlap in patients with RTT and ASD, participants in the ASD cohort  
5 will be asked to complete only the relevant questions in the questionnaire battery that would  
6 be applicable and relevant to them.  
7  
8  
9

10  
11 The questionnaire battery will be presented to study participants in HealthTracker™, a multi-  
12 modal web-based portal for remote online completion using developmentally appropriate  
13 interfaces. Participants will be given a unique ID number and log-in information and will be  
14 asked to complete the questionnaires independently. The research team will be able to  
15 support participants with questionnaire completion should they need it. Where applicable,  
16 participants will also be able to complete paper versions of the questionnaires if they request  
17 them. Participant medical records will be accessed only by members of the study team to  
18 validate the questionnaire against details of diagnoses obtained from patient case notes as  
19 well as against the Development and Well-being Assessment (DAWBA)<sup>76</sup>, and  
20 treatment/medication status if they are available in case notes. Patient records will also be  
21 used to gain genetic information on the specific mutation and diagnosis. Consent will be  
22 obtained to access medical notes.  
23  
24  
25  
26  
27  
28  
29  
30  
31  
32  
33  
34  
35  
36

37 All participants will be asked to complete the questionnaire battery, at baseline, again after 1  
38 week and then between 4 and 6 months after first completion to assess questionnaire stability.  
39  
40

### 41 ***Stage 3: Wearable Sensor Technology***

42  
43 The use of wearable sensor technology to improve treatment outcomes has gathered  
44 momentum in recent years<sup>77</sup> and is currently being used to develop new outcome measures in  
45 patients with complex neurodisability such as Amyotrophic Lateral Sclerosis<sup>78</sup>. Using  
46 wearable sensor technology as a PROM is not without its challenges. In RTT, wearable  
47 technology has been used to explore respiratory and cardiac function in observational  
48 studies<sup>79,80</sup> and in two recent clinical trials<sup>46,47</sup>, however, inherently captured biometric data  
49  
50  
51  
52  
53  
54  
55  
56  
57  
58  
59

1  
2  
3 can be noisy especially from quasi-periodic oscillations from cardiac rhythms. Wrist worn  
4  
5 devices might be particularly susceptible to this type of noise. To mitigate these issues, we  
6  
7 have applied the methods described previously<sup>81,82</sup> to analyse heart rate variability and  
8  
9 electrodermal activity as metrics when evaluating wrist sensor biometric data and autonomic  
10  
11 function in a 15 year old girl with RTT. We were able to demonstrate a recalibration of the  
12  
13 autonomic equilibrium from pre-treatment to post-treatment using buspirone (30 mg/day)<sup>58</sup>,  
14  
15 and subsequent improvement in EBAD in this girl. Quasi-periodic oscillations cannot be  
16  
17 easily quantified using conventional methods. To manage this phase-rectified signal  
18  
19 averaging (PRSA)<sup>83</sup> may be used in conjunction with spectral factorization and applied to the  
20  
21 beat-to-beat RR interval data, which is particularly prone to extraneous noise. This  
22  
23 methodology coupled with EDA assessment will provide more sensitive methods to capture  
24  
25 changes in autonomic physiology in patients with RTT. In the context of this study, the  
26  
27 outcomes of the wearable sensor technology will marry into the outcomes of the newly  
28  
29 developed questionnaire (REST), with psychosocial and genetic data to create the TRIAL  
30  
31 database. The technology will be evaluated in individuals with RTT, ASD and healthy  
32  
33 controls.  
34  
35

### 36 ***Sample size***

#### 37 *Justification for Sample Size*

38  
39  
40 Owing to the small sample population of individuals with rare and complex genetic disorders,  
41  
42 formal modelling to obtain sample size estimates will not be readily applicable.  
43  
44

#### 45 *Stage 1: Questionnaire Development Stage*

46  
47  
48 It is anticipated that the total number of participants for the questionnaire development stage  
49  
50 of the study will be between 10-20 (including participants and clinicians). In our experience,  
51  
52 focus groups involving families with children with rare diseases are well versed with the  
53  
54 problems associated with the condition in question. Often, the themes that need to be  
55  
56  
57  
58

1  
2  
3 addressed get saturated after a couple of focus groups, leading to us getting the basic structure  
4  
5 of the items needed to be tested in Stage 2.

#### 6 7 *Stage 2: Questionnaire Validation Stage*

8  
9 The total number of participants for the questionnaire validation stage of the study will be  
10  
11 150 participants (n=100 RTT cohort and n=50 ASD cohort). The number in the ASD cohort  
12  
13 will be split so that 25 parents/carers will either have a male or female diagnosed with ASD.  
14

#### 15 16 *Stage 3: Wearable Sensor Technologies Stage*

17  
18 The total number of participants for the wearable technology stage of the study is expected to  
19  
20 be 100 participants (n=50 RTT cohort and n=50 [25 male and 25 female] ASD cohort). This  
21  
22 part of the study will also include a matched healthy control group.  
23

#### 24 25 *Stage 4: Longitudinal monitoring in RTT patients*

26  
27 Longitudinal data capture on a 3 monthly basis from 80 - 100 parents/carers of individuals  
28  
29 with RTT will be undertaken using the REST questionnaire over a 12-18 month period.  
30  
31 Ethics submission for stage 4 of the study will be done after stages 1-3 have been completed.  
32

#### 33 34 ***Recruitment***

35  
36 Information sheets (and age appropriate information sheets where relevant) will be provided  
37  
38 for all participants, in addition to consent forms. Information sheets will emphasise that  
39  
40 participant involvement in the research is voluntary and they have the right to withdraw from  
41  
42 the research at any time, without giving a reason. In addition, participants will be advised that  
43  
44 participating or withdrawing from the research will have no impact on their usual care that  
45  
46 they are currently receiving, or will receive in the future. A minimum of 24 hours will be  
47  
48 given between providing study information and recruitment of participants into the study.  
49

#### 50 51 ***Stage 1: Questionnaire Development Stage Recruitment***

52  
53 Parents/carers of individuals with RTT and clinicians who work with individuals with RTT  
54  
55 will be recruited. Due to the group-based nature of the focus groups, parents/carers or  
56  
57

1  
2  
3 clinicians who have not provided consent will not be able to partake in focus groups and will  
4  
5 be excluded. The focus groups will comprise of parents/carers of individuals with RTT and  
6  
7 clinicians working with patients with RTT. Depending on the nature of the focus groups  
8  
9 about 4-6 participants will take part in each focus group.  
10

#### 11 *Questionnaire Development Stage - Inclusion Criteria*

- 12
- 13
- 14 • Parents/carers/partners/relatives of individuals aged between 6 to 40 years with RTT.
- 15
- 16 • Clinicians who work within healthcare settings in South London and Maudsley
- 17 (SLaM) NHS Foundation Trust that see children and/or adults with RTT and
- 18 associated developmental conditions.
- 19
- 20
- 21
- 22 • Without any exclusion for concurrent stable medication.
- 23

#### 24 *Questionnaire Development Stage - Exclusion Criteria*

- 25
- 26
- 27 • Parents/carers whom do not have a reasonable level of English. This is because a
- 28 reasonable level of English will be required to engage in the focus groups.
- 29
- 30

#### 31 ***Stage 2: Questionnaire Validation Stage Recruitment***

32  
33 For this stage of the study, parents/carers of individuals with RTT and those with ASD will  
34  
35 be recruited via clinician/researcher invite. Study participants will be under the care of a  
36  
37 service within SLaM NHS Foundation Trust. Where relevant,  
38  
39 parents/carers/partners/relatives of individuals with RTT and ASD will be asked to provide  
40  
41 details of their clinician at the time of consent so that they can also be contacted by the  
42  
43 research team and invited to take part.  
44

#### 45 *Questionnaire Validation Stage - Inclusion Criteria*

- 46
- 47
- 48 • Parents/carers of individuals aged between 6 to 40 years with RTT or ASD.
- 49
- 50
- 51
- 52
- 53
- 54
- 55
- 56
- 57
- 58



### *Questionnaire Validation Stage - Exclusion Criteria*

- If parents/carers of individuals aged between 6 to 40 years with RTT or ASD are not able to (or expected to not be able to) complete questionnaires they will be excluded from the study.
- Parents/carers who do not have a reasonable level of English will be excluded from the validation stage of the study. This is because a reasonable level will be required to complete questionnaires which will only be available in English at the validation stage. A research assistant may assist the Parent/carer in completion.

### ***Stage 3: Wearable Sensor Technologies Stage Recruitment***

Individuals aged between 6 to 40 years with RTT and ASD, and parents/carers/partners/relatives of individuals with RTT and ASD will be recruited via clinician/researcher invite. Information sheets (and age appropriate information sheets where relevant) will be provided for all participants, in addition to consent forms and where applicable assent forms. Healthy controls will be recruited via clinician/researcher invite using widely used and appropriate advertising channels.

### *Wearable Sensor Technologies Stage - Inclusion Criteria*

#### RTT

- Females aged 6 - 40 years with confirmed diagnosis of RTT (via clinician/researcher invite).
- Parents/carers/partners/relatives of individuals aged 6 - 40 years with RTT.

#### ASD

- Males and females aged 6 - 40 years with ASD (via clinician/researcher invite).
- Parents/carers/partners/relatives of individuals aged 6 - 40 years with ASD.

#### Healthy Controls

- Males and females aged 6 - 40 years considered to be healthy for their age (via clinician/researcher invite).
- Are capable of understanding and complying with the requirements of the protocol.

#### *Wearable Sensor Technologies Stage - Exclusion Criteria*

##### RTT

- Individuals aged 6 - 40 years with RTT who are not able to (or expected to not be able to) wear the wearable sensor technology will be excluded from the study.
- Parents/carers/partners/relatives of individuals aged 6 - 40 years with RTT who do not have a reasonable level of English.

##### ASD

- Individuals (aged 6 - 40 years with ASD who are not able to (or expected to not be able to) wear the sensor technology will be excluded from the study.
- Parents/carers/partners/relatives of individuals aged 6 - 40 years with ASD who do not have a reasonable level of English.

##### Healthy Controls

- Individuals who are not able to (or expected to not be able to) wear the sensor technology will be excluded from the study.
- Individuals who do not have a reasonable level of English.

#### **Analyses Plan**

##### ***Questionnaire Development***

Data obtained from the focus groups will be recorded securely and transcribed accurately, paying close attention to the identified themes and issues. The analysis will be performed as described previously<sup>65</sup>. In brief, the focus group data will be organised into clinically

1  
2  
3 meaningful themes using thematic and content analysis. Following this, to manage the  
4 qualitative data generated from the focus groups, NVivo software will be used and the data  
5 analysis will be guided by the framework for thematic analysis<sup>84</sup>.  
6  
7

### 8 9 ***Questionnaire Validation***

10  
11 The quantitative data will be analysed using the latest version of the SPSS statistical package  
12 (IBM SPSS Statistics for Windows. Armonk, NY: IBM Corp.).  
13

#### 14 15 *Internal Consistency*

16  
17 Internal consistency of the measures will be reported using Cronbach's alpha. Alpha  
18 coefficients  $\geq 0.85$  will be indicative of reasonable evidence of internal reliability<sup>85</sup>. Where  
19 applicable, 'alpha if deleted analyses' will be performed to see if omitting any item(s) from  
20 the (subthemes of the) questionnaire would strengthen the measure.  
21  
22  
23  
24  
25

#### 26 27 *Test-retest reliability*

28  
29 Intra-class correlation (ICC) will be used to assess test-retest reliability on subscale and total  
30 scores as described<sup>86</sup>. Given the exploratory nature of this study, weighted Cohen's kappa  
31 values will also be determined to assess test-retest reliability at the item level. The ICC will  
32 also be performed after 4 to 6 months after initial completion of the questionnaire to assess  
33 the long term stability of the new questionnaire.  
34  
35  
36  
37  
38

#### 39 40 *Validity*

41  
42 Validity (discriminative power) of the new questionnaire will be assessed using Receiver  
43 Operating Characteristic (ROC) analyses as described in Santosh et al. (2016)<sup>65</sup>. As there are  
44 no gold standard questionnaires for patients with RTT, where applicable the ROC analyses  
45 will also be performed on the scores on the RTT Natural History Study, the RSBQ and the  
46 RSSS. Where necessary and if data are available, ANOVA (general linear model) will be  
47 performed with grouping variable DAWBA diagnoses (coded in 1 for positive and coded 0  
48 for negative diagnosis) so that the differences in REST scoring can be assessed.  
49  
50  
51  
52  
53  
54  
55  
56  
57  
58

### *Factor analysis*

Studies involving small sample sizes have often been plagued by the inappropriate use of Exploratory Factor Analysis (EFA) or Principal Component Analysis (PCA) to identify clinically meaningful factor items<sup>87</sup>. Many recommendations have been put forward regarding sample sizes but there does not seem to be an overall consensus<sup>88</sup>. Some have suggested improbable sample sizes that would not be feasible for studies of rare and complex genetic diseases<sup>89</sup>. In these instances, methods to reveal the multi-dimensional aspects of factor structure are not as straightforward. Recently, the Regularized Exploratory Factor Analysis (REFA) was introduced<sup>90</sup> that is recommended over EFA and PCA, when samples sizes are less than 50. Despite this new approach, it is unclear whether the REFA would be applicable for a multidimensional questionnaire in a condition with many variables. In the context of the new questionnaire, the robustness of the REST will be evaluated using tools applicable for smaller samples sizes<sup>90</sup> and those used in exploratory studies as described recently<sup>91</sup>.

### ***Gender Differences***

In Stage 3 (Wearable Sensor Technologies Stage), if the data meet the requirements for parametric testing, the general linear model (GLM) (ANOVA) covaried for gender will be applied to the RTT and ASD cohorts.

### **Dissemination**

The goal of this study is to develop and validate a new RTT questionnaire. The REST questionnaire will reduce the burden and improve the overall healthcare delivery of individuals with RTT and when coupled with the data from the wearable sensor technology as well as psychosocial and genetic information will be used to construct the TRIAL database. Using the functionality of the HealthTracker<sup>TM</sup> platform the TRIAL database will provide all the necessary information to clinicians and researchers about different aspects of

1  
2  
3 the disease and serve as a barometer for improving treatment pathways in individuals. This  
4 will allow algorithms to be developed alerting parent/carers to request unscheduled clinician  
5 appointments when symptoms deviate significantly from one another thereby streamlining  
6 the patient care pathway. Rare disorders such as RTT have a limited patient population and it  
7 is therefore crucial for patients to be stratified using phenotype and biomarkers (such as those  
8 obtained through wearable sensor monitoring). Adaptive clinical trial design using Bayesian  
9 methodology has been suggested to augment the statistical power and decrease the number of  
10 patients required for a rare disease trial<sup>72</sup>. In this view, the TRIAL database will serve for the  
11 recruitment of patients into clinical trials as baseline information would already be available  
12 so the clinical trial can be conducted with fewer patients and in a more cost-effective manner.  
13 Results stemming from this study will be disclosed unreservedly and the findings published  
14 in scientific journals and will also be presented in meetings and conferences for professionals,  
15 patients as well as carers and families. Reverse Rett UK will lead on wider dissemination of  
16 the applied research findings to engage policy-makers, key professional groups and service  
17 managers, and parents/carers of children with RTT.

### 35 **Funding**

36 We thank Reverse Rett UK for funding this research study (Ref No: PCCTABR)

### 41 **Author Contributions**

42 JS drafted, wrote and revised the manuscript, and wrote the documentation required for  
43 ethical approval of the study. KL provided important intellectual review of the manuscript  
44 and reviewed the documentation required for ethical approval of the study. FF reviewed the  
45 statistical components and reviewed the manuscript. PS secured funding and conceived the  
46 study, and revised the manuscript critically for important intellectual content.

### **Acknowledgements**

We are indebted to Reverse Rett UK for their helpful comments and suggestions on the study design.

### **Conflicts of Interest**

PS is the co-inventor of the HealthTracker™ and is a Director and shareholder in HealthTracker Ltd. FF is a Data Analyst and KL is a Project Manager employed by HealthTracker Ltd respectively.

JS is on the Professional Advisory Board for Reverse Rett UK and acts as a Scientific Advisor.

## References

1. Rett A. (1966). On a unusual brain atrophy syndrome in hyperammonemia in childhood. *Wiener Medizinische Wochenschrift*. 116: 723–726.
2. Zoghbi HY. (2016). Rett Syndrome and the Ongoing Legacy of Close Clinical Observation. *Cell*. 167: 293-297.
3. Neul JL, Kaufmann WE, Glaze DG. et al. (2010). Rett syndrome: revised diagnostic criteria and nomenclature. *Ann. Neurol*. 68: 944-50.
4. Vorsanova GS, Iourov YI, Yurov BY. (2004). Neurological, genetic and epigenetic features of Rett syndrome. *J. Ped. Neurol*. 2: 179-190.
5. Fehr S, Bebbington A, Nassar N. et al. (2011). Trends in the diagnosis of Rett syndrome in Australia. *Pediatr. Res*. 70: 313-319.
6. Bienvenu T, Carrie A, de Roux N. et al. (2000). MECP2 mutations account for most cases of typical forms of Rett syndrome. *Human Molecular Genetics*. 9: 1377-84.
7. Evans JC, Archer HL, Colley JP et al. (2005). Early onset seizures and Rett-like features associated with mutations in CDKL5. *European Journal of Human Genetics*. 13: 1113–1120.
8. Philippe C, Amsallem D, Francannet C. et al. (2010). Phenotypic variability in Rett syndrome associated with FOXP1 mutations in females. *Journal of Medical Genetics*. 47: 59–65.
9. Lucariello M, Vidal E, Vidal S. et al. (2016). Whole exome sequencing of Rett syndrome-like patients reveals the mutational diversity of the clinical phenotype. *Hum. Genet*. 135: 1343-1354.
10. Lewis JD, Meehan RR, Henzel WJ. *et al.* (1992). Purification, sequence, and cellular localization of a novel chromosomal protein that binds to methylated DNA. *Cell*. 69: 905-14.
11. Guy J, Gan J, Selfridge J. et al. (2007). Reversal of neurological defects in a mouse model of Rett syndrome. *Science*. 315: 1143-7.

12. Katz DM, Bird A, Coenraads M. et al. (2016). Rett Syndrome: Crossing the Threshold to Clinical Translation. *Trends Neurosci.* 39: 100-113.
13. Stefanelli G, Gandaglia A, Costa M. et al. (2016). Brain phosphorylation of MeCP2 at serine 164 is developmentally regulated and globally alters its chromatin association. *Sci. Rep.* 2016 Jun 21; 6:28295.
14. Skene PJ, Illingworth RS, Webb S. et al. (2010). Neuronal MeCP2 is expressed at near histone-octamer levels and globally alters the chromatin state. *Mol. Cell.* 37: 457-68.
15. Witteveen JS, Willemsen MH, Dombroski TC. et al. (2016). Haploinsufficiency of MeCP2-interacting transcriptional co-repressor SIN3A causes mild intellectual disability by affecting the development of cortical integrity. *Nat Genet.* 2016 Jul 11:1-11.
16. Nott A, Cheng J, Gao F. et al. (2016). Histone deacetylase 3 associates with MeCP2 to regulate FOXO and social behavior. *Nat. Neurosci.* 19: 1497-1505.
17. Shah RR, Bird AP. (2017) MeCP2 mutations: progress towards understanding and treating Rett syndrome. *Genome Med.* 9: 17.
18. Zylka MJ, Simon JM, Philpot BD. (2015). Gene length matters in neurons. *Neuron.* 286: 353-5.
19. Gabel HW, Kinde B, Stroud H. et al. (2015). Disruption of DNA-methylation-dependent long gene repression in Rett syndrome. *Nature.* 522: 89-93.
20. Meng X, Wang W, Lu H. et al. (2016). Manipulations of MeCP2 in glutamatergic neurons highlight their contributions to Rett and other neurological disorders. *Elife.* 21; 5. pii: e14199.
21. Ure K, Lu H, Wang W. et al. (2016). Restoration of MeCP2 expression in GABAergic neurons is sufficient to rescue multiple disease features in a mouse model of Rett Syndrome. *Elife.* 21; 5. pii: e14198.



- 1  
2  
3 22. Gibson JH, Williamson SL, Arbuckle S & Christodoulou J. (2005). X chromosome  
4 inactivation patterns in brain in Rett syndrome: Implications for the disease phenotype. *Brain*  
5 *Development*. 27: 266–270.  
6  
7  
8  
9 23. Xinhua B, Shengling J, Fuying S, Hong P, Meirong L. & Wu XR. (2008). X chromosome  
10 inactivation in Rett Syndrome and its correlations with MECP2 mutations and phenotype.  
11 *Journal of Child Neurology*. 23: 22–25.  
12  
13  
14  
15 24. Leonard H, Cobb S, Downs J. (2017). Clinical and biological progress over 50 years in  
16 Rett syndrome. *Nat. Rev. Neurol*. 13: 37-51.  
17  
18  
19  
20 25. Dolce A, Ben-Zeev B, Naidu S, Kossoff EH. (2013). Rett syndrome and epilepsy: an  
21 update for child neurologists. *Pediatr. Neurol*. 48: 337-345.  
22  
23  
24 26. Knight VM, Horn PS, Gilbert DL, Standridge SM. (2016). The Clinical Predictors That  
25 Facilitate a Clinician's Decision to Order Genetic Testing for Rett Syndrome. *Pediatr. Neurol*.  
26  
27 63: 66-70.  
28  
29  
30 27. Christodoulou J, Grimm A, Maher T, Bennetts B. RettBASE. (2003). The IRSA MECP2  
31 variation database-a new mutation database in evolution. *Hum. Mutat*. 21: 466-72.  
32  
33  
34 28. Louise S, Fyfe S, Bebbington A. et al. (2009). InterRett, a model for international data  
35 collection in a rare genetic disorder. *Research in Autism Spectrum Disorders*. 2009 3(3).  
36  
37  
38 29. Sampieri K, Meloni I, Scala E. et al. (2007). Italian Rett database and biobank. *Human*  
39 *Mutation*. 28: 329-35.  
40  
41  
42  
43 30. Grillo E, Villard L, Clarke A, et al. (2012). Rett networked database: an integrated  
44 clinical and genetic network of Rett syndrome databases. *Human Mutation*. 33: 1031-6.  
45  
46  
47 31. Percy AK, Lane JB, Childers J et al. (2007). Rett syndrome: North American database.  
48 *Journal Child Neurology*. 22: 1338-41.  
49  
50  
51 32. Percy A, Neul J, Glaze D. et al. (2010). Rett syndrome diagnostic criteria: Lessons from  
52 the Natural History Study. *Ann Neurol*. 68: 951–955.  
53  
54  
55  
56  
57  
58

- 1  
2  
3 33. Itoh M, Saikusa T, Tanioka T. et al. (2016). A study of Methyl-CpG Binding Protein 2  
4 mutations and locomotion ability; Consideration from Japanese Rett Syndrome Database.  
5 Rett Syndrome – RTT50.1. Wiener Medizinische Wochenschrift 11-12.  
6  
7  
8  
9 34. Lang AE, Eberly S, Goetz CG et al. (2013). Movement disorder society unified Parkinson  
10 disease rating scale experiences in daily living: longitudinal changes and correlation with  
11 other assessments. *Mov. Disord.* 28: 1980-1986.  
12  
13  
14 35. Shapiro EG, Nestrasil I, Ahmed A. et al. (2015) Quantifying behaviors of children with  
15 Sanfilippo syndrome: the Sanfilippo Behavior Rating Scale. *Mol. Genet. Metab.* 114: 594-  
16 598.  
17  
18  
19 36. FitzGerald PM, Jankovic J. & Percy AK. (1990). Rett syndrome and associated  
20 movement disorders. *Mov. Disord.* 5: 195–202.  
21  
22  
23 37. Tarquinio DC, Motil KJ, Hou W. et al. (2012). Growth failure and outcome in Rett  
24 syndrome: specific growth references. *Neurology* 79: 1653–61.  
25  
26  
27 38. Mount RH, Charman T, Hastings RP, Reilly S, Cass H (2002). The Rett Syndrome  
28 Behaviour Questionnaire (RSBQ): Refining the behavioural phenotype of Rett syndrome. *J.*  
29 *Child. Psychol. Psychiatry* 43: 1099–1110.  
30  
31  
32 39. Esbensen AJ, Rojahn J, Aman MG, Ruedrich S (2003). Reliability and validity of an  
33 assessment instrument for anxiety, depression, and mood among individuals with mental  
34 retardation. *J. Autism Dev. Disord.* 33: 617–629.  
35  
36  
37 40. Kerr A. M., Nomura Y., Armstrong D., et al. (2001). Guidelines for reporting clinical  
38 features in cases with MECP2 mutations. *Brain & Development.* 23: 208–211.  
39  
40  
41 41. Pini G, Congiu L, Benincasa A. et al. (2016). Illness Severity, Social and Cognitive  
42 Ability, and EEG Analysis of Ten Patients with Rett Syndrome Treated with Mecasermin  
43 (Recombinant Human IGF-1). *Autism Res. Treat.* Epub 2016 Jan 26.  
44  
45  
46  
47  
48  
49  
50  
51  
52  
53  
54  
55  
56  
57  
58  
59

- 1  
2  
3 42. Kaufmann WE, Tierney E, Rohde CA. et al. (2012). Social impairments in Rett  
4 syndrome: Characteristics and relationship with clinical severity. *J. Intellect. Disabil. Res.* 56:  
5 233–247.  
6  
7  
8  
9 43. Tarquinio DC, Hou W, Berg et al. (2017). Longitudinal course of epilepsy in Rett  
10 syndrome and related disorders. *Brain.* 140: 306-318.  
11  
12  
13 44. Neul JL, Glaze DG, Percy AK. et al. (2015). Improving Treatment Trial Outcomes for  
14 Rett Syndrome: The Development of Rett-specific Anchors for the Clinical Global  
15 Impression Scale. *J. Child Neurol.* 30: 1743-1748.  
16  
17  
18 45. Lane JB, Lee HS, Smith LW. et al. (2011). Clinical severity and quality of life in children  
19 and adolescents with Rett syndrome. *Neurology.* 77:1812-1818.  
20  
21  
22 46. Djukic A, Holtzer R, Shinnar S. et al. (2016). Pharmacologic Treatment of Rett Syndrome  
23 With Glatiramer Acetate. *Pediatr. Neurol.* 61: 51-57.  
24  
25  
26 47. Khwaja OS, Ho E, Barnes KV. et al. (2014). Safety, pharmacokinetics, and preliminary  
27 assessment of efficacy of mecasermin (recombinant human IGF-1) for the treatment of Rett  
28 syndrome. *Proc. Natl. Acad. Sci. U S A.* 111:4596-4601.  
29  
30  
31 48. <https://www.clinicaltrials.gov/ct2/show/NCT02790034?term=newron&rank=2> (accessed  
32 25 February 2017).  
33  
34  
35 49. Kolevzon A, Bush L, Wang AT. et al. (2014). A pilot controlled trial of insulin-like  
36 growth factor-1 in children with Phelan-McDermid syndrome. *Mol. Autism.* 5: 54.  
37  
38  
39 50. Naidu S, Johnston MV. (2011). Neurodevelopmental disorders: Clinical criteria for Rett  
40 syndrome. *Nat. Rev. Neurol.* 7: 312-314  
41  
42  
43 51. Robertson L, Hall SE, Jacoby P. et al. (2006). The association between behavior and  
44 genotype in Rett syndrome using the Australian Rett Syndrome Database. *Am. J. Med.*  
45 *Genet. B. Neuropsychiatr Genet.* 141B (2): 177-183.  
46  
47  
48  
49  
50  
51  
52  
53  
54  
55  
56  
57  
58  
59  
60

- 1  
2  
3 52. Barnes KV, Coughlin FR, O'Leary HM. et al. (2015). Anxiety-like behavior in Rett  
4 syndrome: characteristics and assessment by anxiety scales. *J. Neurodev. Disord.* 7(1): 30.  
5  
6  
7 53. Downs J, Stahlhut M, Wong K. et al. (2016). Validating the Rett Syndrome Gross Motor  
8 Scale. *PLoS One.* 11: e0147555.  
9  
10  
11 54. Bebbington A, Anderson A, Ravine D. et al. (2008). Investigating genotype-phenotype  
12 relationships in Rett syndrome using an international data set. *Neurology.* 70: 868–75.  
13  
14  
15 55. Neul JL, Fang P, Barrish J. (2008), et al. Specific mutations in methyl-CpG-binding  
16 protein 2 confer different severity in Rett syndrome. *Neurology.* 70 (16 Part 1):1313–21.  
17  
18  
19 56. Halbach N, Smeets EE, Julu P. et al. (2016). Neurophysiology versus clinical genetics in  
20 Rett syndrome: A multicenter study. *Am. J. Med .Genet A.* 170: 2301-9.  
21  
22  
23 57. Santosh PJ, Bell L, Fiori F, Singh J. (2016). Pediatric Antipsychotic Use and Outcomes  
24 Monitoring. *J. Child Adolesc. Psychopharmacol.* Sep 8.  
25  
26  
27 58. Singh J and Santosh P (2017). Psychopharmacology of Neurodevelopmental Disorders in  
28 Children, pp. 325-362 in *Child and Adolescent Psychiatry: Asian Perspectives.* Edition 1,  
29 Springer. Nature.  
30  
31  
32 59. Santosh PJ, Bell L, Lievesley K, Singh J, Fiori F (2016). Paradoxical Physiological  
33 Responses to Propranolol in a Rett Syndrome Patient: A Case Report. *BMC Paediatrics*  
34 29;16: 194.  
35  
36  
37 60. Julu PO, Kerr AM, Hansen S. et al. (1997). Functional evidence of brain stem immaturity  
38 in Rett syndrome. *Eur. Child Adolesc. Psychiatry.* 6 Suppl 1: 47-54.  
39  
40  
41 61. Julu PO, Kerr AM, Apartopoulos F. et al. (2001). Characterisation of breathing and  
42 associated central autonomic dysfunction in the Rett disorder. *Arch Dis. Child.* 85: 29–37.  
43  
44  
45 62. Julu PO & Witt Engerstrom I. (2005). Assessment of the maturity-related brainstem  
46 functions reveals the heterogeneous phenotypes and facilitates clinical management of Rett  
47 syndrome. *Brain & Development.* 27 (Suppl. 1): S43–S53.  
48  
49  
50  
51  
52  
53  
54  
55  
56  
57  
58  
59

- 1  
2  
3 63. Julu PO, Engerström IW, Hansen S (2008). Cardiorespiratory challenges in Rett's  
4 syndrome. *Lancet*. 371: 1981-3.  
5  
6  
7 64. US Department of Health and Human Services Food and Drug Administration. Guidance  
8 for industry: patient-reported outcome measures: use in medical product development to  
9 support labelling claims. Secondary Guidance for industry: patient-reported outcome  
10 measures: use in medical product development to support labelling claims. 2009.  
11 <http://www.fda.gov/downloads/Drugs/GuidanceComplianceRegulatoryInformation/Guidance>  
12 [s/UCM193282.pdf](http://www.fda.gov/downloads/Drugs/GuidanceComplianceRegulatoryInformation/Guidance)  
13  
14  
15 65. Santosh P, Tarver J, Gibbons F. et al. (2016). Protocol for the development and validation  
16 of a questionnaire to assess concerning behaviours and mental health in individuals with  
17 autism spectrum disorders: the Assessment of Concerning Behaviour (ACB) scale. *BMJ*  
18 *Open*. 6: e010693.  
19  
20  
21 66. Liberati A, Altman DG, Tetzlaff J. et al. (2009). The PRISMA statement for reporting  
22 systematic reviews and meta-analyses of studies that evaluate health care interventions:  
23 explanation and elaboration. *Annals of Internal Medicine*. 151: W-65.  
24  
25  
26 67. <https://www.healthtracker.co.uk>  
27  
28  
29 68. Santosh P. STOP study aims to monitor suicidality. (2014) *EU Research* 36–39.  
30  
31 69. [http://cordis.europa.eu/project/rcn/110200\\_en.html](http://cordis.europa.eu/project/rcn/110200_en.html) (accessed 25 February 2017)  
32  
33  
34 70. Santosh P, Gringras P, Baird G. et al. (2015). Development and psychometric properties  
35 of the parent version of the Profile of Neuropsychiatric Symptoms (PONS) in children and  
36 adolescents. *BMC Pediatrics* 15: 62.  
37  
38  
39 71, Lilford RJ, Thornton JG, Braunholtz D. (1995). Clinical trials and rare diseases: a way  
40 out of a conundrum. *BMJ* 311: 1621–1625.  
41  
42  
43  
44  
45  
46  
47  
48  
49  
50  
51  
52  
53  
54  
55  
56  
57  
58  
59  
60

- 1  
2  
3 72. Hampson LV, Whitehead J, Eleftheriou D. et al. (2015). Elicitation of expert prior  
4 opinion: application to the MYPAN trial in childhood polyarteritis nodosa. PLoS One. 30;  
5 10: e0120981.  
6  
7  
8  
9 73. Theoharides TC, Athanassiou M, Panagiotidou S, Doyle R. (2015). Dysregulated brain  
10 immunity and neurotrophin signaling in Rett syndrome and autism spectrum disorders. J.  
11 Neuroimmunol. 279: 33-8.  
12  
13  
14  
15 74. Neul, J.L. The relationship of Rett syndrome and MECP2 disorders to autism. (2012).  
16 Dialogues Clin. Neurosci. 14, 253–262.  
17  
18  
19 75. Carter JC, Lanham DC, Pham D. et al. (2008). Selective cerebral volume reduction in  
20 Rett syndrome: a multiple-approach MR imaging study. AJNR Am. J Neuroradiol. 29: 436-  
21 41.  
22  
23  
24  
25  
26 76. Goodman R, Ford T, Richards H. et al. (2000). The Development and Well-Being  
27 Assessment: description and initial validation of an integrated assessment of child and  
28 adolescent psychopathology. J. Child Psychol. Psychiatry 41: 645–55.  
29  
30  
31  
32  
33 77. <http://www.proteus.com/> (accessed 25 February 2017)  
34  
35 78. <https://clinicaltrials.gov/ct2/show/NCT02447952> (accessed 25 February 2017)  
36  
37 79. Weese-Mayer DE, Lieske SP, Boothby CM. et al. (2006). Autonomic nervous system  
38 dysregulation: breathing and heart rate perturbation during wakefulness in young girls with  
39 Rett syndrome. Pediatr Res. 60: 443-449.  
40  
41  
42  
43 80. Weese-Mayer DE, Lieske SP, Boothby CM. et al. (2008). Autonomic dysregulation in  
44 young girls with Rett Syndrome during night-time in-home recordings. Pediatr. Pulmonol.  
45 43: 1045-1060.  
46  
47  
48  
49 81. Tarvainen MP, Niskanen JP, Lipponen JA. et al. (2014). Kubios HRV--heart rate  
50 variability analysis software. Comput. Methods Programs Biomed. 113: 210-20.  
51  
52  
53  
54  
55  
56  
57  
58  
59  
60

- 1  
2  
3 82. Benedek M, Kaernbach C. (2010). A continuous measure of phasic electrodermal  
4 activity. *J. Neurosci. Methods.* 190: 80-91.  
5  
6  
7 83. Bauer A, Kantelhardt WJ, Bunde A. et al. (2006). Phase-rectified signal averaging detects  
8 quasi-periodicities in non-stationary data. *Physica A: Statistical Mechanics and its*  
9 *Applications.* 364: 423-434.  
10  
11  
12  
13 84. Braun V. & Clarke V. (2006). Using thematic analysis in psychology. *Qualitative*  
14 *Research in Psychology.* 3: 77-101.  
15  
16  
17 85. Portney LG, Watkins MP. (2009). *Foundations of clinical research: Applications to*  
18 *practice.* 3rd ed. Upper Saddle River, N.J.: Pearson/Prentice Hall.  
19  
20  
21  
22 86. Weir JP. (2005). Quantifying test-retest reliability using the intraclass correlation  
23 coefficient and the SEM. *Journal of Strength and Conditioning Research / National Strength*  
24 *& Conditioning Association.* 19: 231–40.  
25  
26  
27  
28 87. MacCallum RC. & Austin JT. (2000). Applications of structural equation modeling in  
29 psychological research. *Annual Review of Psychology.* 51, 201–226.  
30  
31  
32  
33 88, de Winter JCF, Dodou, D, Wieringa PA (2009). Exploratory Factor Analysis with small  
34 sample sizes. *Multivariate Behavioral Research.* 44: 147–181.  
35  
36  
37  
38 89. Rouquette A. & Falissard B. (2011). Sample size requirements for the internal validation  
39 of psychiatric scales. *International Journal of Methods in Psychiatric Research.* 20: 235-249.  
40  
41  
42 90. Jung S & Soonmook K. (2011). Exploratory factor analysis for small samples. *Behaviour*  
43 *Res.* 43: 701-709.  
44  
45  
46 91. Vindras P, Desmurget M, Baraduc P. (2012). When One Size Does Not Fit All: A Simple  
47 Statistical Method to Deal with Across-Individual Variations of Effects. *PLoS One.* 7:  
48 e39059.  
49  
50  
51  
52  
53  
54  
55  
56  
57  
58  
59  
60

1  
2  
3 Figure 1: Flow diagram illustrating the sequence of steps showing how data obtained from  
4 the TRIAL database can be used to provide timely intervention to streamline treatment  
5 outcomes in patients with RTT syndrome  
6  
7  
8  
9

10 **INSERT FIGURE 1 HERE**  
11  
12

13 Abbreviations: REST (Rett Evaluation of Symptoms and Treatments) questionnaire; RTT (Rett Syndrome);  
14 TRIAL (Tailored Rett Intervention and Assessment Longitudinal) database  
15

16 Notes:

17 The term 'wearables' has been coined for wearable sensor technology

18 Genetic and psychosocial information will be captured as part of the REST questionnaire  
19  
20  
21  
22  
23  
24  
25  
26  
27  
28  
29  
30  
31  
32  
33  
34  
35  
36  
37  
38  
39  
40  
41  
42  
43  
44  
45  
46  
47  
48  
49  
50  
51  
52  
53  
54  
55  
56  
57  
58  
59  
60



Table 1: Measures to be administered during Stage 2 (Validation) and Stage 3 (Wearable Sensor Technology) of the Study

| Measure                                                         | Key Information                                                                                                                                                                                                                                                                                                                                       | Administered to:    |                     |                  |                                     |                                             |                      |
|-----------------------------------------------------------------|-------------------------------------------------------------------------------------------------------------------------------------------------------------------------------------------------------------------------------------------------------------------------------------------------------------------------------------------------------|---------------------|---------------------|------------------|-------------------------------------|---------------------------------------------|----------------------|
|                                                                 |                                                                                                                                                                                                                                                                                                                                                       | Individual with RTT | Individual with ASD | Healthy Subjects | Parent/Carer of Child with RTT/*ASD | Parent/Carer/Partner of Adult with RTT/*ASD | Clinician/Researcher |
| Rett Natural History study <sup>32</sup>                        | More than 1000 participants with RTT providing information on important aspects of disorder symptomatology                                                                                                                                                                                                                                            |                     |                     |                  |                                     |                                             | X                    |
| Rett Syndrome Behavioural Questionnaire (RSBQ) <sup>38</sup>    | Provides an accurate measure of the behavioural features of RTT                                                                                                                                                                                                                                                                                       |                     |                     |                  | X                                   | X                                           |                      |
| Rett Syndrome Severity Score (RSSS) <sup>42</sup>               | Provides information on the overall clinical severity and severity across individual parameters: <ul style="list-style-type: none"> <li>• frequency and manageability of seizures;</li> <li>• respiratory abnormalities</li> <li>• scoliosis;</li> <li>• ability to walk;</li> <li>• hand use;</li> <li>• speech;</li> <li>• sleep hygiene</li> </ul> |                     |                     |                  |                                     |                                             | X                    |
| Rett Evaluation of Symptoms and Treatments (REST) questionnaire | A multidimensional questionnaire that can capture clinically meaningful data across the lifespan in individuals with RTT and improve treatment pathways                                                                                                                                                                                               |                     |                     |                  | X                                   | X                                           | X                    |
| Wearable Sensor Technology                                      | Captures real-time biometric physiological data (heart rate variability, skin conductance, blood volume pressure, perspiration and temperature)                                                                                                                                                                                                       | X                   | X                   | X                |                                     |                                             |                      |
| Anticipated                                                     |                                                                                                                                                                                                                                                                                                                                                       | 30                  | 30                  | 30               | ~60                                 | ~60                                         | ~60                  |

1  
2  
3  
4  
5  
6  
7  
8  
9  
10  
11  
12  
13  
14  
15  
16  
17  
18  
19  
20  
21  
22  
23  
24  
25  
26  
27  
28  
29  
30  
31  
32  
33  
34  
35  
36  
37  
38  
39  
40  
41  
42  
43  
44  
45  
46  
47

|                               |  |  |  |  |  |  |  |
|-------------------------------|--|--|--|--|--|--|--|
| Administration Time (minutes) |  |  |  |  |  |  |  |
|-------------------------------|--|--|--|--|--|--|--|

\* Participants in the ASD cohort will be asked to complete only the relevant questions in the questionnaire battery that would be applicable and relevant to them  
 Abbreviations: ASD (Autism Spectrum Disorder); REST (Rett Evaluation of Symptoms and Treatments) questionnaire; RSBQ (Rett Syndrome Behavioural Questionnaire); RSSS (Rett Syndrome Severity Score); RTT (Rett Syndrome)

For peer review only

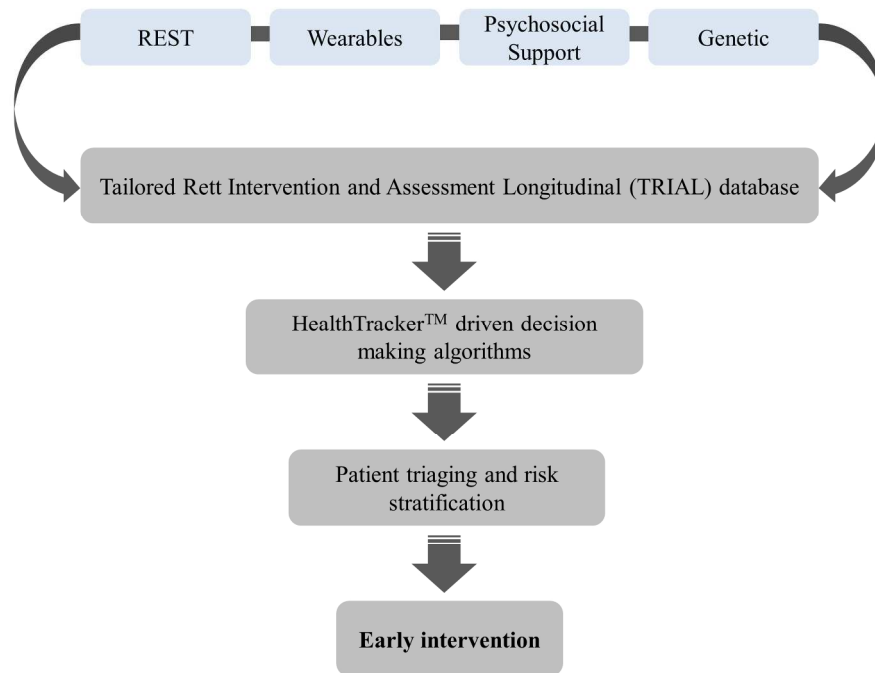

45  
46  
47  
48  
49

Figure 1: Flow diagram illustrating the sequence of steps showing how data obtained from the TRIAL database can be used to provide timely intervention to streamline treatment outcomes in patients with RTT syndrome

50  
51

Abbreviations: REST (Rett Evaluation of Symptoms and Treatments) questionnaire; RTT (Rett Syndrome); TRIAL (Tailored Rett Intervention and Assessment Longitudinal) database

52

Notes:

53  
54  
55  
56  
57  
58  
59  
60

The term 'wearables' has been coined for wearable sensor technology  
Genetic and psychosocial information will be captured as part of the REST questionnaire

1  
2  
3  
4  
5  
6  
7  
8  
9  
10  
11  
12  
13  
14  
15  
16  
17  
18  
19  
20  
21  
22  
23  
24  
25  
26  
27  
28  
29  
30  
31  
32  
33  
34  
35  
36  
37  
38  
39  
40  
41  
42  
43  
44  
45  
46  
47  
48  
49  
50  
51  
52  
53  
54  
55  
56  
57  
58  
59  
60

190x254mm (300 x 300 DPI)

For peer review only

# BMJ Open

## Development of the Tailored Rett Intervention and Assessment Longitudinal (TRIAL) database and the Rett Evaluation of Symptoms and Treatments (REST) Questionnaire

|                                 |                                                                                                                                                                                                                                                                                                                                                                                                                                                                                                                                                                                                                                                                                                                                               |
|---------------------------------|-----------------------------------------------------------------------------------------------------------------------------------------------------------------------------------------------------------------------------------------------------------------------------------------------------------------------------------------------------------------------------------------------------------------------------------------------------------------------------------------------------------------------------------------------------------------------------------------------------------------------------------------------------------------------------------------------------------------------------------------------|
| Journal:                        | <i>BMJ Open</i>                                                                                                                                                                                                                                                                                                                                                                                                                                                                                                                                                                                                                                                                                                                               |
| Manuscript ID                   | bmjopen-2016-015342.R2                                                                                                                                                                                                                                                                                                                                                                                                                                                                                                                                                                                                                                                                                                                        |
| Article Type:                   | Protocol                                                                                                                                                                                                                                                                                                                                                                                                                                                                                                                                                                                                                                                                                                                                      |
| Date Submitted by the Author:   | 12-Apr-2017                                                                                                                                                                                                                                                                                                                                                                                                                                                                                                                                                                                                                                                                                                                                   |
| Complete List of Authors:       | Singh, Jatinder; Institute of Psychiatry, Psychology & Neuroscience, Department of Child and Adolescent Psychiatry<br>Lievesley, Kate; Institute of Psychiatry, Psychology & Neuroscience, Department of Child and Adolescent Psychiatry<br>Fiori, Federico; Institute of Psychiatry, Psychology & Neuroscience, Department of Child and Adolescent Psychiatry; Centre for Interventional Paediatric Psychopharmacology and Rare Diseases, South London and Maudsley NHS Foundation Trust<br>Santosh , Paramala; Institute of Psychiatry, Psychology & Neuroscience, Department of Child and Adolescent Psychiatry; Centre for Interventional Paediatric Psychopharmacology and Rare Diseases, South London and Maudsley NHS Foundation Trust |
| <b>Primary Subject Heading</b>: | Mental health                                                                                                                                                                                                                                                                                                                                                                                                                                                                                                                                                                                                                                                                                                                                 |
| Secondary Subject Heading:      | Paediatrics, Patient-centred medicine                                                                                                                                                                                                                                                                                                                                                                                                                                                                                                                                                                                                                                                                                                         |
| Keywords:                       | Child & adolescent psychiatry < PSYCHIATRY, Protocols & guidelines < HEALTH SERVICES ADMINISTRATION & MANAGEMENT, MENTAL HEALTH                                                                                                                                                                                                                                                                                                                                                                                                                                                                                                                                                                                                               |
|                                 |                                                                                                                                                                                                                                                                                                                                                                                                                                                                                                                                                                                                                                                                                                                                               |

SCHOLARONE™  
Manuscripts

# Development of the Tailored Rett Intervention and Assessment Longitudinal (TRIAL) database and the Rett Evaluation of Symptoms and Treatments (REST) Questionnaire

Singh J<sup>1</sup>, Lievesley K<sup>1,3</sup>, Fiori F<sup>1,2,3</sup>, Santosh P<sup>1,2,3</sup>

## Affiliations:

<sup>1</sup>Department of Child and Adolescent Psychiatry, King's College London, London, UK

<sup>2</sup>Centre for Interventional Paediatric Psychopharmacology and Rare Diseases, South London and Maudsley NHS Foundation Trust, London, UK

<sup>3</sup>HealthTracker Ltd, Gillingham, Kent, United Kingdom

## Corresponding author:

Dr Paramala Santosh,

Centre for Interventional Paediatric Psychopharmacology and Rare Diseases (CIPPRD)

Research Team,

4 Windsor Walk, Denmark Hill,

London SE5 8BB,

United Kingdom

E-mail: [paramala.1.santosh@kcl.ac.uk](mailto:paramala.1.santosh@kcl.ac.uk)

## Key Words

Biomarkers; HealthTracker<sup>TM</sup>; Questionnaire Development and Validation; Rett Syndrome; Tailored Rett Intervention and Assessment Longitudinal (TRIAL) database; Wearable Sensor Technology

## Abstract

**Introduction:** Rett Syndrome (RTT) is a pervasive neurodevelopmental disorder that presents with deficits in brain functioning leading to language and learning regression, characteristic hand stereotypies and developmental delay. Different mutations in the gene implicated in RTT - methyl-CpG-binding protein 2 (*MECP2*) establishes RTT as a disorder with divergent symptomology ranging from individuals with severe to milder phenotypes. A reliable and single multidimensional questionnaire is needed that can embrace all symptoms, and the relationships between them, and can map clinically meaningful data to symptomatology across the lifespan in RTT patients. As part of the HealthTracker™-based Tailored Rett Intervention and Assessment Longitudinal (TRIAL) database, the Rett Evaluation of Symptoms and Treatments (REST) Questionnaire will be able to marry with the physiological aspects of the disease obtained using wearable sensor technology, along with genetic and psychosocial data to stratify patients. Taken together, the web-based TRIAL database will empower clinicians and researchers with the confidence to delineate between different aspects of disorder symptomatology to streamline care pathways for individuals or for those patients entering clinical trials. This protocol describes the anticipated development of the REST questionnaire and the TRIAL database which links with the outcomes of the wearable sensor technology, and will serve as a barometer for longitudinal patient monitoring in patients with RTT.

**Methods and Analysis:** The US FDA Guidance for Patient-reported Outcome Measures (PROM) will be used as a template to inform the methodology of the study. It will follow an iterative framework that will include item/concept identification, item/concept elicitation in parent/carer mediated focus groups, expert clinician feedback, web based presentation of questionnaires, initial scale development, instrument refinement and instrument validation.

1  
2  
3  
4  
5  
6  
7  
8  
9  
10  
11  
12  
13  
14  
15  
16  
17  
18  
19  
20  
21  
22  
23  
24  
25  
26  
27  
28  
29  
30  
31  
32  
33  
34  
35  
36  
37  
38  
39  
40  
41  
42  
43  
44  
45  
46  
47  
48  
49  
50  
51  
52  
53  
54  
55  
56  
57  
58  
59  
60

**Ethics and dissemination:** The study has received favourable opinion from the NHS Research Ethics Committee (REC): NHS Research Ethics Committee (REC) – London, Bromley Research Ethics Committee (reference: 15/LO/1772).

For peer review only



## Strengths and Limitations of the Study:

Strengths of this Study are:

- The development of the Rett Evaluation of Symptoms and Treatments (REST) questionnaire will follow the FDA framework for Patient Reported Outcome Measures.
- The new questionnaire will capture clinically meaningful change of symptomatology in individuals with Rett Syndrome (RTT) across the lifespan.
- The HealthTracker™-based TRIAL database will link the behavioural data with the physiological aspects of the disease.
- It will gather feedback from parent-based charities such as Reverse Rett UK.
- The TRIAL database will enable the streamlining of treatment and expedite triaging of care by signposting patients to correct specialists sooner to enable timely intervention.
- The use of HealthTracker™, a multi-modal eHealth web-based monitoring platform, will make the TRIAL database as user friendly as possible and allows it to be tailored to the individual participant.
- The TRIAL database has the potential to be used globally, allowing for quicker development of decision-support analytics and personalized care.

Limitation of this Study:

- The questionnaire battery will be completed remotely so the extent to which participants feel comfortable using the Internet and computers may affect completion rates.
- Participation might be time consuming for families.

## Introduction

Rett Syndrome (RTT) can trace its genesis to a clinical waiting room in Vienna (1965)<sup>1</sup> where Dr. Rett first observed the clinical signs and symptoms of RTT. Symptoms usually appear between 6 to 18 months after birth<sup>2</sup> and clinically RTT presents with impairments in brain functioning leading to language and learning regression, hand stereotypies (hand washing/wringing) and developmental stagnation. RTT is predominantly found in young females with an incidence of about 1: 10,000 live births<sup>3</sup>. There are geographical variations<sup>4</sup> with one Australian study indicating a prevalence of about 1:9000<sup>5</sup>. The prevalence is probably underscored by the high clinical variability of the disease and hence the frequency could be underestimated. Loss of function in the methyl-CpG binding protein 2 (*MECP2*) gene is responsible for the disorder in the vast majority of cases<sup>6</sup>, with rarer cases being attributed to mutations in *CDKL5* and *FOXG1* gene<sup>7,8</sup> leading to atypical or variant RTT. More recently, mutations in other less known candidate genes have emerged such as those encoding ankyrin repeat proteins and neuronal acetylcholine receptor subunits<sup>9</sup>. MeCP2 is a highly conserved nuclear protein abundant in the mammalian brain<sup>10</sup> and notably the disorder is reversible in mice models of RTT<sup>11</sup>.

MeCP2 acts as a critical epigenetic modulator in the mammalian brain, controlling overlapping mechanisms such as DNA methylation and post-translational mechanisms<sup>12</sup>. Through differential post-translational modification at serine 164<sup>13</sup>, MeCP2 may help in limiting transcriptional noise<sup>14</sup> of other genes. For example, mutations in the gene *switch-insensitive 3 family member A* (*SIN3A*), a *MECP2* interactor and transcriptional repressor – crucial for cortical integrity, causes intellectual disability and ASD<sup>15</sup> and the *MECP2*<sup>R306C</sup> mutation prevents MeCP2 from interacting with the NCoR/histone deacetylase 3 (HDAC3) complex resulting in impediments in social and cognitive functioning in animal models<sup>16</sup>. *MeCP2* has complex genome level modalities, and the general opinion is that loss of the

1  
2  
3 transcriptional repressor function of *MECP2* impacts other genes crucial for post-natal  
4 neuronal development and has led others to suggest that this leads to a sub-optimal brain<sup>17</sup>.  
5  
6 This seems to be the significant driver for the classical RTT clinical phenotype. Genes in  
7 neuronal development tend to be long (100 kb or larger)<sup>18</sup> and as the transcriptional  
8 repression function of *MECP2* is biased towards longer genes<sup>19</sup>, it is likely that impairments  
9 of long genes associated with neuronal development dictates the functional and  
10 developmental versatility of the MeCP2 protein seen in RTT. This has a knock-on effect on  
11 the homeostasis of excitatory and inhibitory pathways<sup>20,21</sup> in RTT brains leading to the  
12 clinical versatility that is commonly observed.

13  
14  
15  
16  
17  
18  
19  
20  
21  
22 *MECP2* being an X-linked gene, has an impact on the phenotype of RTT patients and the  
23 clinical severity. The X chromosome inactivation can cause uneven expression of wild type  
24 and mutant alleles resulting in skewed patterns of RTT phenotype severity<sup>22,23</sup>, and the degree  
25 of DNA-methylation-dependent long gene repression<sup>19</sup>. The range of functional ability in  
26 RTT patients is therefore broad and depending upon the type of genetic mutation ranges from  
27 patients with severe functional impairments to those with milder symptoms<sup>24</sup>; hence  
28 assessment and care pathways must be individually tailored to each affected person.

29  
30  
31  
32  
33  
34  
35  
36  
37 Although there have been considerable advances in understanding the genetics and into the  
38 genetic testing of RTT, the diagnosis of RTT is based on the 2010 revised consensus clinical  
39 criteria<sup>3</sup> (see Table 1 in Neul *et al.*, 2010) and recommends that all individuals with RTT  
40 should be first be assessed according to the revised clinical criteria followed by a thorough  
41 genetic test for *MECP2*. Given that about 3-5% of RTT individuals who fulfil the diagnostic  
42 clinical criteria do not have *MECP2* mutations, and this is even higher for atypical RTT  
43 cases<sup>25</sup>, more recently clinical predictors that can facilitate a clinician's decision making to  
44 order genetic testing for RTT have been provided<sup>26</sup>. This showed that the likelihood of a  
45 having a positive *MECP2* test was greatest in patients with partial or complete attenuation of  
46  
47  
48  
49  
50  
51  
52  
53  
54  
55  
56  
57  
58  
59  
60

1  
2  
3 hand skills. Impairments in gait and hand stereotypies were also strong predictors. Of interest  
4 was that loss of speech did not discriminate whether an individual was *MECP2+* or *MECP2-*.

5  
6  
7 *Pre-existing measures in RTT*

8  
9 As far as we are aware, no complete instrument has been developed for individuals with RTT  
10 that can capture longitudinal pharmacological, behavioural, genetic and psychosocial  
11 information, as well as an ability to correlate this with the physiological aspects of the  
12 disease. Previous datasets/instruments have been inconsistent and provide limited information  
13 on the behavioural and physiological facets of the disease. Whilst, some might provide  
14 information on the genetic diagnoses of individuals with RTT, there is a lack of consistency.  
15 First, RettBase, collected mainly molecular genetic data from the Australian cohort of RTT  
16 patients<sup>27</sup>. Some other instruments have included both genetic and clinical data, although the  
17 clinical data was limited. InterRETT, an Australian Rett syndrome database, was based on  
18 data collection by distributing a questionnaire to families<sup>28</sup>. The Italian Rett Database and  
19 Biobank consisted of 357 patients and had 20 structured and seven descriptive clinical items  
20 along with 17 structured genetic items<sup>29</sup>. The British Isles Rett Syndrome Survey, included  
21 275 British Rett patients and had 271 structured and 94 descriptive clinical items, and six  
22 structured genetic items<sup>30</sup>. An American survey collected data on the natural history of the  
23 disease that allowed researchers and physicians to access comprehensive patient data on more  
24 than 1000 individuals with RTT<sup>31,32</sup>. These datasets were preserved and integrated into the  
25 Rett Networked Database<sup>30</sup> and offers an amalgamated data repository for researchers to  
26 access anonymized patient information. Elsewhere, the Japanese RTT database (JRDB)  
27 includes the clinical data from 102 females with a median age of 11 years old<sup>33</sup>.

28  
29 Capture of disease severity and sensitivity to change throughout the lifespan in patients are  
30 important elements that need to be considered when developing clinically meaningful  
31 outcome measures. The Unified Parkinson Disease Rating Scale, (UPDRS) is a good example  
32  
33  
34  
35  
36  
37  
38  
39  
40  
41  
42  
43  
44  
45  
46  
47  
48  
49  
50  
51  
52  
53  
54  
55  
56  
57  
58  
59  
60

1  
2  
3 of an outcome measure that is effective and can capture disease severity and clinically  
4 meaningful change of symptoms of Parkinson's disease<sup>34</sup>. With rare diseases, the Sanfilippo  
5 Behaviour Rating Scale (SBRS), a 68-item questionnaire developed using 44 families, is also  
6 effective and can map the behavioural phenotype of children with Sanfilippo syndrome to  
7 disease progression and/or results from treatment across the lifespan<sup>35</sup>. In RTT, the current  
8 outcome measures are inadequate in their ability to capture disease severity across the  
9 lifespan, although others have made significant headway in this area. The 37-item motor-  
10 behavioural assessment (MBA) incorporates historical items with items from direct clinician  
11 evaluations and has been used to describe clinical severity in RTT<sup>36,37</sup>, whilst the Rett  
12 Syndrome Behavioral Questionnaire (RSBQ), a validated checklist, was designed to  
13 differentiate individuals with RTT compared to those with severe intellectual disability<sup>38</sup>.  
14 Other measures tested in RTT include the Anxiety Depression and Mood Scale (ADAMS)<sup>39</sup>,  
15 the clinician based International Scoring System (ISS)<sup>40,41</sup> to evaluate the disease severity,  
16 Vineland Adaptive Behaviour scale<sup>42</sup>, the 13 item Rett Clinical Severity Scale (RCSS)<sup>37,43</sup>  
17 and its modified version<sup>42</sup>. Others have developed RTT specific anchors such as for the  
18 Clinical Global Impression Severity (CGI-S) scale based on scores from the RCSS for  
19 improved outcome measures in clinical trials<sup>44</sup>. Quality of Life (QOL) measures such as the  
20 Child Health Questionnaire-P50 have also been used in RTT<sup>45</sup> including a recent Phase II  
21 open label clinical trial using glatiramer acetate<sup>46</sup>. Some of these measures such as the MBA,  
22 RSBQ, ADAMS and RCSS have been implemented into clinical trials to evaluate the effect  
23 of Insulin-like Growth Factor (IGF-1)<sup>47</sup> or Sarizotan<sup>48</sup> in individuals with RTT, or to develop  
24 a novel scoring tool (Rett Severity Score [RSS]) to assess the impact of IGF-1 treatment in  
25 RTT<sup>41</sup>. Other scales such as the Mullen Scales for Early Learning used in other rare  
26 disorders<sup>49</sup>, have also been adapted for use in RTT<sup>47</sup>. These measures are not without their  
27 faults. Some have suggested that the MBA can be difficult to use with some items that

1  
2  
3 describe disease regression having not been validated<sup>24</sup>. This is important given that in some  
4  
5 RTT patients, disease regression has been described as transient or often goes unrecognised<sup>50</sup>.  
6  
7 Others such as the RSBQ although are suitable to measure some aspects of behaviour such as  
8  
9 mood and anxiety<sup>51</sup> might not be able to capture the salient features of behaviour as an  
10  
11 outcome measure in a clinical trial in RTT patients. Furthermore, there is differing reliability  
12  
13 of anxiety scales in RTT, with ADAMS especially its Social Avoidance subscale having the  
14  
15 best psychometric properties in comparison to the RSBQ<sup>52</sup>. Whilst no outcome measure will  
16  
17 be perfect, these studies have paved the way for more sensitive outcome measures to be  
18  
19 developed such as the validated 15 item Gross Motor Scale for individuals with RTT<sup>53</sup>.

### 22 *Autonomic Function in RTT*

23  
24 Large cross-sectional studies investigating the genotype-phenotype relationships have  
25  
26 revealed divergence in the phenotype seen in individuals with RTT<sup>54,55</sup>. These were the first  
27  
28 studies of sufficient sample size that bestowed important information on the genotype and  
29  
30 phenotype relationships in RTT, and have been elegantly summarised elsewhere<sup>24</sup>. Some  
31  
32 mutations or variants dictate a more severe phenotype when it comes to motor abilities<sup>24,54,55</sup>  
33  
34 and cardio-respiratory phenotypes<sup>24,56</sup>. Moreover, at present it is unknown whether autonomic  
35  
36 dysfunction is governed by any specific mutation in RTT<sup>24,56</sup>. Assessing the autonomic  
37  
38 dysfunction in individuals in RTT is therefore a pressing clinical concern.  
39  
40

41  
42 Autonomic dysfunction is a pivotal factor that requires consideration when managing patients  
43  
44 with rare disorders such as RTT. From our clinical experience when managing patients in the  
45  
46 Centre for Interventional Paediatric Psychopharmacology and Rare Diseases (CIPPRD)<sup>57</sup>,  
47  
48 autonomic dysfunction is often found in patients who do not respond to treatment and those  
49  
50 with significant functional disability. Autonomic dysfunction co-occurs in the context of  
51  
52 emotional and behavioural dysregulation, and recently using wearable sensor technology, we  
53  
54 have shown that Emotional, Behavioural and Autonomic Dysregulation (EBAD) is a crucial  
55  
56  
57  
58

1  
2  
3 factor that needs to be considered when managing patients with RTT<sup>58,59</sup>. Although  
4 autonomic dysfunction has been investigated in individuals with RTT<sup>60-63</sup>, the progression of  
5 autonomic dysfunction and the developmental trajectory of EBAD has never been researched.  
6  
7 Moreover, the components of EBAD in a questionnaire that can map across other  
8  
9  
10  
11  
12  
13  
14  
15  
16  
17  
18  
19  
20  
21  
22  
23  
24  
25  
26  
27  
28  
29  
30  
31  
32  
33  
34  
35  
36  
37  
38  
39  
40  
41  
42  
43  
44  
45  
46  
47  
48  
49  
50  
51  
52  
53  
54  
55  
56  
57  
58  
59  
60

### **Aim**

The objective of this study is to develop and validate a comprehensive multi-system questionnaire (Rett Evaluation of Symptoms and Treatments – REST) that can profile the symptomatology of patients with RTT and is sensitive to change across the lifespan allowing better understanding of patient needs. In parallel, information collected using wearable sensor technology<sup>58,59</sup> will be linked to data obtained from the REST questionnaire, genetic data and information about available psychosocial support from the patient and their family, to form a comprehensive Tailored Rett Intervention and Assessment Longitudinal (TRIAL) database. The TRIAL database will streamline treatment approaches to expedite triaging of care by signposting patients to correct specialists earlier than is currently happening (Figure 1). Specifically, the functionality of the multi-modal HealthTracker™ platform will be exploited so that anonymised data from the TRIAL database can be used to develop a parent/carer alert system to signal when it may be useful to request unscheduled clinician appointments. Using this functionality, the TRIAL database will also be able to stratify patients to inform adaptive clinical trial design, by allowing pre-existing datasets to be used so that rare disease trials can be done in a more cost-effective manner.

### **Methods and Analyses**

The title of this questionnaire was based on the feedback of the focus groups involving parents and carers of children with RTT from the parent based charities such as Reverse Rett UK, and clinician feedback. It will incorporate elements from previous scales<sup>40,52</sup> and

1  
2  
3 standardised RTT questionnaires – data from the Natural History Study<sup>3</sup>, Rett Syndrome  
4 Behaviour Questionnaire (RSBQ)<sup>38</sup> and the modified version of the Rett Syndrome Severity  
5 Scale (RSSS)<sup>42</sup>. It is anticipated that the questionnaire will not take more than 30 minutes to  
6  
7 complete.  
8  
9

10  
11 The United States (US) Food and Drug Administration (FDA) Guidance for Patient-reported  
12 Outcome Measures (PROM)<sup>64</sup> will be used as a template to guide the methodology in the  
13 study. It was described in Santosh *et al.* (2016)<sup>65</sup> and will follow an iterative framework that  
14 will involve item/concept identification, item/concept elicitation in parent/carer mediated  
15 focus groups, clinician feedback, web based presentation of questionnaires, initial scale  
16 development, instrument refinement and instrument validation.  
17  
18

19  
20  
21  
22  
23  
24 ***Stage 1: Qualitative Development of the Rett Evaluation of Symptoms and Treatment***  
25 ***(REST) questionnaire***  
26

27 ***Concept identification***  
28

29  
30 For this initial phase, a systematic literature review will be conducted according to the  
31 “Preferred Reporting Items for Systematic Reviews and Meta-Analyses (PRISMA)<sup>66</sup> to  
32 identify signs and symptoms that are deemed to be problematic in RTT. A draft version will  
33 be reviewed by expert clinicians who have substantial experience in RTT and Autism  
34 Spectrum Disorder (ASD). Common themes will be identified and draft version of the  
35 questionnaire will be prepared based on their feedback.  
36  
37  
38  
39  
40  
41  
42  
43

44 ***Concept elicitation***  
45

46 This stage will involve parents/carers of individuals aged between 6 to 40 years with RTT. A  
47 series of focus groups anticipated to last about 1.5 hours will be conducted as part of the  
48 concept elicitation stage. These focus groups will include parents/carers of individuals with  
49 RTT from the parent-based charities such as Reverse Rett, UK, and clinicians who see RTT  
50 patients. The groups will follow a semi-structured format using open-ended questions to  
51  
52  
53  
54  
55  
56  
57  
58  
59



1  
2  
3 allow participants to discuss their experiences and views. Some of the focus groups will be on  
4 item generation whilst others may centre on reviewing draft versions of the questionnaire  
5 identifying pertinent themes. Focus groups will be audio recorded and each group will  
6 include approximately 4-6 parents/carers of children with RTT. Up to two researchers may be  
7 present for the focus groups, which will be led by a Consultant Child and Adolescent  
8 Psychiatrist/Specialist. All participants will also be asked to complete a demographic  
9 questionnaire.

#### 10 11 12 *Web based presentation of questionnaires on the HealthTracker™ platform*

13  
14 HealthTracker™, a web-based health monitoring platform<sup>67</sup>, has been successfully trialed in  
15 multi-centric European Union FP7 studies<sup>68,69</sup> and in a questionnaire development and  
16 validation study<sup>70</sup>. Parents and carers will be shown how the REST questionnaire might  
17 appear on the HealthTracker™ platform, how the response options to the questionnaire could  
18 be presented and whether a choice of single or multiple-choice questions would be  
19 appropriate. The various views of the focus groups will be used to choose the most optimal  
20 web-based visualization of the questionnaire.

#### 21 22 23 *Tool review*

24  
25 As far as the authors are aware, no questionnaire exists that not only is RTT focused but can  
26 capture a broad range of problematic themes, in particular, the developmental trajectory of  
27 EBAD. Nor do these existing questionnaires/scales attempt to marry this with the  
28 physiological measurements from wearable sensor technology. At this stage, a further  
29 literature review will be conducted to identify any themes that may have been missed during  
30 the focus groups and whether any further areas of RTT symptomatology that were not  
31 highlighted in the focus groups needs to be addressed. In addition, parents/carers from  
32 Reverse Rett, UK, will be consulted and any feedback incorporated into the tool review stage.

1  
2  
3 Following the focus groups, study participants will be sent a copy of the draft version of the  
4 questionnaire (via email or post). Once this part has been completed, a draft operating beta  
5 version of the questionnaire will be finalised.  
6  
7

8  
9 ***Stage 2: Validation of the Rett Evaluation of Symptoms and Treatments (REST)***  
10 ***questionnaire***  
11

12  
13 This stage of the study will involve parents/carers of individuals aged between 6 to 40 years  
14 with RTT. Questionnaires to assess the longitudinal trajectory of symptomatology in rare  
15 diseases have proven to be difficult to validate<sup>71,72</sup>. To broach this conundrum, it is important  
16 to focus on the symptoms and not just the clinical diagnosis, and be able to evaluate the  
17 symptom level across other comparable patient groups. At the neuronal level, the brains of  
18 RTT and ASD patients share many core features<sup>73</sup>. Both RTT and ASD exhibit behaviours  
19 that might overlap i.e. there are deficits in social behaviour and speech and in both cases  
20 individuals may share common stereotypical behaviours<sup>74</sup>. Due to these similarities and based  
21 on consultation with clinicians with expertise in ASD, as a comparator group, this stage of  
22 the study will also include parents/carers/partners of individuals aged between 6 to 40 years  
23 with ASD with significant intellectual disability. It will also involve clinicians who see  
24 patients with RTT and ASD who will test the clinician version of the questionnaire.  
25 Participants (parents/carers and clinicians) will be recruited to complete the respective  
26 versions of the Rett Evaluation of Symptoms and Treatments (REST) questionnaire as well as  
27 other standardised questionnaires – namely the RSSS and the RSBQ (Table 1). The  
28 RSSS<sup>37,42,43,75</sup> and the RSBQ<sup>38,51</sup> have previously been used in studies with RTT patients.  
29 Pertinent information will also be taken from the RTT Natural History Study<sup>31,32</sup>. It is  
30 anticipated that 50 participants in the RTT cohort and 50 in the ASD with significant  
31 intellectual disability cohort will complete the questionnaire battery. Although there is  
32 significant symptom overlap in patients with RTT and ASD, participants in the ASD cohort  
33  
34  
35  
36  
37  
38  
39  
40  
41  
42  
43  
44  
45  
46  
47  
48  
49  
50  
51  
52  
53  
54  
55  
56  
57  
58  
59  
60

1  
2  
3 will be asked to complete only the relevant questions in the questionnaire battery that would  
4 be applicable and relevant to them.  
5

6  
7 The questionnaire battery will be presented to study participants in HealthTracker™, a multi-  
8 modal web-based portal for remote online completion using developmentally appropriate  
9 interfaces. Participants will be given a unique ID number and log-in information and will be  
10 asked to complete the questionnaires independently. The research team will be able to  
11 support participants with questionnaire completion should they need it. Where applicable,  
12 participants will also be able to complete paper versions of the questionnaires if they request  
13 them. Participant medical records will be accessed only by members of the study team to  
14 validate the questionnaire against details of diagnoses obtained from patient case notes as  
15 well as against the Development and Well-being Assessment (DAWBA)<sup>76</sup>, and  
16 treatment/medication status if they are available in case notes. Patient records will also be  
17 used to gain genetic information on the specific mutation and diagnosis. Consent will be  
18 obtained to access medical notes.  
19  
20  
21  
22  
23  
24  
25  
26  
27  
28  
29  
30  
31  
32

33 All participants will be asked to complete the questionnaire battery, at baseline, again after 1  
34 week and then between 4 and 6 months after first completion to assess questionnaire stability.  
35  
36

### 37 ***Stage 3: Wearable Sensor Technology***

38  
39 The use of wearable sensor technology to improve treatment outcomes has gathered  
40 momentum in recent years<sup>77</sup> and is currently being used to develop new outcome measures in  
41 patients with complex neurodisability such as Amyotrophic Lateral Sclerosis<sup>78</sup>. Using  
42 wearable sensor technology as a PROM is not without its challenges. In RTT, wearable  
43 technology has been used to explore respiratory and cardiac function in observational  
44 studies<sup>79,80</sup> and in two recent clinical trials<sup>46,47</sup>, however, inherently captured biometric data  
45 can be noisy especially from quasi-periodic oscillations from cardiac rhythms. Wrist worn  
46 devices might be particularly susceptible to this type of noise. To mitigate these issues, we  
47  
48  
49  
50  
51  
52  
53  
54  
55  
56  
57  
58  
59

1  
2  
3 have applied the methods described previously<sup>81,82</sup> to analyse heart rate variability and  
4  
5 electrodermal activity as metrics when evaluating wrist sensor biometric data and autonomic  
6  
7 function in a 15-year-old girl with RTT. We were able to demonstrate a recalibration of the  
8  
9 autonomic equilibrium from pre-treatment to post-treatment using buspirone (30 mg/day)<sup>58</sup>,  
10  
11 and subsequent improvement in EBAD in this girl. Quasi-periodic oscillations cannot be  
12  
13 easily quantified using conventional methods. To manage this, phase-rectified signal  
14  
15 averaging (PRSA)<sup>83</sup> may be used in conjunction with spectral factorization and applied to the  
16  
17 beat-to-beat RR interval data, which is particularly prone to extraneous noise. This  
18  
19 methodology coupled with EDA assessment will provide more sensitive methods to capture  
20  
21 changes in autonomic physiology in patients with RTT. In the context of this study, the  
22  
23 outcomes of the wearable sensor technology will marry into the outcomes of the newly  
24  
25 developed questionnaire (REST), with psychosocial and genetic data to create the TRIAL  
26  
27 database. The technology will be evaluated in individuals with RTT, ASD and healthy  
28  
29 controls.  
30  
31

### 32 ***Sample size***

#### 33 *Justification for Sample Size*

34  
35 Owing to the small sample population of individuals with rare and complex genetic disorders,  
36  
37 formal modelling to obtain sample size estimates will not be readily applicable.  
38  
39

#### 40 *Stage 1: Questionnaire Development Stage*

41  
42 It is anticipated that the total number of participants for the questionnaire development stage  
43  
44 of the study will be between 10-20 (including participants and clinicians). In our experience,  
45  
46 focus groups involving families with children with rare diseases are well versed with the  
47  
48 problems associated with the condition in question. Often, the themes that need to be  
49  
50 addressed get saturated after a couple of focus groups, leading to us getting the basic structure  
51  
52 of the items needed to be tested in Stage 2.  
53  
54  
55  
56  
57  
58

### *Stage 2: Questionnaire Validation Stage*

The total number of participants for the questionnaire validation stage of the study will be 150 participants (n=100 RTT cohort and n=50 ASD cohort). The number in the ASD cohort will be split so that 25 parents/carers will either have a male or female diagnosed with ASD.

### *Stage 3: Wearable Sensor Technologies Stage*

The total number of participants for the wearable technology stage of the study is expected to be 100 participants (n=50 RTT cohort and n=50 [25 male and 25 female]) ASD cohort). This part of the study will also include a matched healthy control group.

### *Stage 4: Longitudinal monitoring in RTT patients*

Longitudinal data capture on a 3-monthly basis from 80 - 100 parents/carers of individuals with RTT will be undertaken using the REST questionnaire over a 12-18 month period. Ethics submission for stage 4 of the study will be done after stages 1-3 have been completed.

### ***Recruitment***

Information sheets (and age appropriate information sheets where relevant) will be provided for all participants, in addition to consent forms. Information sheets will emphasise that participant involvement in the research is voluntary and they have the right to withdraw from the research at any time, without giving a reason. In addition, participants will be advised that participating or withdrawing from the research will have no impact on their usual care that they are currently receiving, or will receive in the future. A minimum of 24 hours will be given between providing study information and recruitment of participants into the study.

### ***Stage 1: Questionnaire Development Stage Recruitment***

Parents/carers of individuals with RTT and clinicians who work with individuals with RTT will be recruited. Due to the group-based nature of the focus groups, parents/carers or clinicians who have not provided consent will not be able to partake in focus groups and will be excluded. The focus groups will comprise of parents/carers of individuals with RTT and

1  
2  
3 clinicians working with patients with RTT. Depending on the nature of the focus groups  
4  
5 about 4-6 participants will take part in each focus group.  
6

7 *Questionnaire Development Stage - Inclusion Criteria*

- 8  
9  
10  
11  
12  
13  
14  
15  
16  
17  
18  
19
- Parents/carers/partners/relatives of individuals aged between 6 to 40 years with RTT.
  - Clinicians who work within healthcare settings in South London and Maudsley (SLaM) NHS Foundation Trust that see children and/or adults with RTT and associated developmental conditions.
  - Without any exclusion for concurrent stable medication.

20 *Questionnaire Development Stage - Exclusion Criteria*

- 21  
22  
23  
24  
25  
26
- Parents/carers whom do not have a reasonable level of English. This is because a reasonable level of English will be required to engage in the focus groups.

27 ***Stage 2: Questionnaire Validation Stage Recruitment***

28  
29 For this stage of the study, parents/carers of individuals with RTT and those with ASD will  
30  
31 be recruited via clinician/researcher invite. Study participants will be under the care of a  
32  
33 service within SLaM NHS Foundation Trust. Where relevant,  
34  
35 parents/carers/partners/relatives of individuals with RTT and ASD will be asked to provide  
36  
37 details of their clinician at the time of consent so that they can also be contacted by the  
38  
39 research team and invited to take part.  
40  
41

42 *Questionnaire Validation Stage - Inclusion Criteria*

- 43  
44  
45
- Parents/carers of individuals aged between 6 to 40 years with RTT or ASD.

46 *Questionnaire Validation Stage - Exclusion Criteria*

- 47  
48  
49  
50  
51  
52  
53  
54  
55  
56  
57  
58
- If parents/carers of individuals aged between 6 to 40 years with RTT or ASD are not able to (or expected to not be able to) complete questionnaires they will be excluded from the study.

- Parents/carers who do not have a reasonable level of English will be excluded from the validation stage of the study. This is because a reasonable level will be required to complete questionnaires, which will only be available in English at the validation stage. A research assistant may assist the Parent/carer in completion.

### ***Stage 3: Wearable Sensor Technologies Stage Recruitment***

Individuals aged between 6 to 40 years with RTT and ASD, and parents/carers/partners/relatives of individuals with RTT and ASD will be recruited via clinician/researcher invite. Information sheets (and age appropriate information sheets where relevant) will be provided for all participants, in addition to consent forms and where applicable assent forms. Healthy controls will be recruited via clinician/researcher invite using widely used and appropriate advertising channels.

#### *Wearable Sensor Technologies Stage - Inclusion Criteria*

##### RTT

- Females aged 6 - 40 years with confirmed diagnosis of RTT (via clinician/researcher invite).
- Parents/carers/partners/relatives of individuals aged 6 - 40 years with RTT.

##### ASD

- Males and females aged 6 - 40 years with ASD (via clinician/researcher invite).
- Parents/carers/partners/relatives of individuals aged 6 - 40 years with ASD.

##### Healthy Controls

- Males and females aged 6 - 40 years considered to be healthy for their age (via clinician/researcher invite).
- Are capable of understanding and complying with the requirements of the protocol.

### *Wearable Sensor Technologies Stage - Exclusion Criteria*

#### RTT

- Individuals aged 6 - 40 years with RTT who are not able to (or expected to not be able to) wear the wearable sensor technology will be excluded from the study.
- Parents/carers/partners/relatives of individuals aged 6 - 40 years with RTT who do not have a reasonable level of English.

#### ASD

- Individuals (aged 6 - 40 years with ASD who are not able to (or expected to not be able to) wear the sensor technology will be excluded from the study.
- Parents/carers/partners/relatives of individuals aged 6 - 40 years with ASD who do not have a reasonable level of English.

#### Healthy Controls

- Individuals who are not able to (or expected to not be able to) wear the sensor technology will be excluded from the study.
- Individuals who do not have a reasonable level of English.

### **Analyses Plan**

#### ***Questionnaire Development***

Data obtained from the focus groups will be recorded securely and transcribed accurately, paying close attention to the identified themes and issues. The analysis will be performed as described previously<sup>65</sup>. In brief, the focus group data will be organised into clinically meaningful themes using thematic and content analysis. Following this, to manage the qualitative data generated from the focus groups, NVivo software will be used and the data analysis will be guided by the framework for thematic analysis<sup>84</sup>.

#### ***Questionnaire Validation***



1  
2  
3 The quantitative data will be analysed using the latest version of the SPSS statistical package  
4 (IBM SPSS Statistics for Windows. Armonk, NY: IBM Corp.).

#### 5 6 7 *Internal Consistency*

8  
9 Internal consistency of the measures will be reported using Cronbach's alpha. Alpha  
10 coefficients  $\geq 0.85$  will be indicative of reasonable evidence of internal reliability<sup>85</sup>. Where  
11 applicable, 'alpha if deleted analyses' will be performed to see if omitting any item(s) from  
12 the (subthemes of the) questionnaire would strengthen the measure.

#### 13 14 15 16 17 *Test-retest reliability*

18  
19 Intra-class correlation (ICC) will be used to assess test-retest reliability on subscale and total  
20 scores as described<sup>86</sup>. Given the exploratory nature of this study, weighted Cohen's kappa  
21 values will also be determined to assess test-retest reliability at the item level. The ICC will  
22 also be performed after 4 to 6 months after initial completion of the questionnaire to assess  
23 the long-term stability of the new questionnaire.

#### 24 25 26 27 28 29 30 31 *Validity*

32  
33 Validity (discriminative power) of the new questionnaire will be assessed using Receiver  
34 Operating Characteristic (ROC) analyses as described in Santosh et al. (2016)<sup>65</sup>. As there are  
35 no gold standard questionnaires for patients with RTT, where applicable the ROC analyses  
36 will also be performed on the scores on the RTT Natural History Study, the RSBQ and the  
37 RSSS. Where necessary and if data are available, ANOVA (general linear model) will be  
38 performed with grouping variable DAWBA diagnoses (coded in 1 for positive and coded 0  
39 for negative diagnosis) so that the differences in REST scoring can be assessed.

#### 40 41 42 43 44 45 46 47 48 *Factor analysis*

49  
50 Studies involving small sample sizes have often been plagued by the inappropriate use of  
51 Exploratory Factor Analysis (EFA) or Principal Component Analysis (PCA) to identify  
52 clinically meaningful factor items<sup>87</sup>. Many recommendations have been put forward  
53  
54  
55  
56  
57  
58

1  
2  
3 regarding sample sizes but there does not seem to be an overall consensus<sup>88</sup>. Some have  
4 suggested improbable sample sizes that would not be feasible for studies of rare and complex  
5 genetic diseases<sup>89</sup>. In these instances, methods to reveal the multi-dimensional aspects of  
6 factor structure are not as straightforward. Recently, the Regularized Exploratory Factor  
7 Analysis (REFA) was introduced<sup>90</sup> that is recommended over EFA and PCA, when samples  
8 sizes are less than 50. Despite this new approach, it is unclear whether the REFA would be  
9 applicable for a multidimensional questionnaire in a condition with many variables. In the  
10 context of the new questionnaire, the robustness of the REST will be evaluated using tools  
11 applicable for smaller samples sizes<sup>90</sup> and those used in exploratory studies as described  
12 recently<sup>91</sup>.

### 23 ***Gender Differences***

24  
25 In Stage 3 (Wearable Sensor Technologies Stage), if the data meet the requirements for  
26 parametric testing, the general linear model (GLM) (ANOVA) covaried for gender will be  
27 applied to the RTT and ASD cohorts.

### 32 **Study dates**

33  
34 The study is expected to complete by January 2019.

### 37 **Dissemination**

38  
39 The goal of this study is to develop and validate a new RTT questionnaire. Data from the  
40 REST questionnaire will be linked with the data from the wearable sensor technology as well  
41 as psychosocial and genetic information to construct the TRIAL database, which will  
42 improve the overall healthcare delivery for individuals with RTT. Using the functionality of  
43 the HealthTracker<sup>TM</sup> platform, the TRIAL database will provide all the necessary information  
44 to clinicians and researchers about different aspects of the disease and serve as a barometer  
45 for improving treatment pathways in individuals. This will allow algorithms to be developed  
46 alerting parent/carers to request unscheduled clinician appointments when symptoms deviate  
47  
48  
49  
50  
51  
52  
53  
54  
55  
56  
57  
58

1  
2  
3 significantly from one another thereby streamlining the patient care pathway. As the  
4 HealthTracker™-based TRIAL database is web-based, with appropriate funding, it has the  
5 potential to be used globally, allowing for quicker development of decision-support analytics  
6 and personalized care.  
7  
8  
9

10  
11 Rare disorders such as RTT have a limited patient population and it is therefore crucial for  
12 patients to be stratified using phenotype and biomarkers (such as those obtained through  
13 wearable sensor monitoring). Adaptive clinical trial design using Bayesian methodology has  
14 been suggested to augment the statistical power and decrease the number of patients required  
15 for a rare disease trial<sup>72</sup>. In this view, the TRIAL database will serve for the recruitment of  
16 patients into clinical trials, as baseline information would already be available so the clinical  
17 trial can be conducted with fewer patients and in a more cost-effective manner.  
18  
19

20  
21 Results stemming from this study will be disclosed unreservedly and the findings published  
22 in scientific journals and will also be presented in meetings and conferences for professionals,  
23 patients as well as carers and families. Reverse Rett UK will lead on wider dissemination of  
24 the applied research findings to engage policy-makers, key professional groups and service  
25 managers, and parents/carers of children with RTT.  
26  
27

### 28 **Funding**

29  
30 We thank Reverse Rett UK for funding part of this research study (Ref No: PCCTABR) and  
31 HealthTracker Ltd for significantly subsidising the costs for this study.  
32  
33  
34  
35  
36

### 37 **Author Contributions**

38  
39 JS drafted, wrote and revised the manuscript, and wrote the documentation required for  
40 ethical approval of the study. KL provided important intellectual review of the manuscript  
41 and reviewed the documentation required for ethical approval of the study. FF reviewed the  
42  
43  
44  
45  
46  
47  
48  
49  
50  
51  
52  
53  
54  
55  
56  
57  
58

1  
2  
3 statistical components and reviewed the manuscript. PS secured funding and conceived the  
4  
5 study, and revised the manuscript critically for important intellectual content.  
6  
7

### 8 9 **Acknowledgements**

10  
11 We are indebted to Reverse Rett UK for their helpful comments and suggestions on the study  
12  
13 design.  
14

### 15 16 **Conflicts of Interest**

17  
18 PS is the co-inventor of the HealthTracker™ and is the Chief Executive Officer and  
19  
20 shareholder in HealthTracker Ltd. FF is a Data Analyst and KL is a Project Manager  
21  
22 employed by HealthTracker Ltd respectively.  
23

24 JS is on the Professional Advisory Board for Reverse Rett UK and acts as a Scientific  
25  
26 Advisor.  
27  
28  
29  
30  
31  
32  
33  
34  
35  
36  
37  
38  
39  
40  
41  
42  
43  
44  
45  
46  
47  
48  
49  
50  
51  
52  
53  
54  
55  
56  
57  
58

## References

1. Rett A. (1966). On a unusual brain atrophy syndrome in hyperammonemia in childhood. *Wiener Medizinische Wochenschrift*. 116: 723–726.
2. Zoghbi HY. (2016). Rett Syndrome and the Ongoing Legacy of Close Clinical Observation. *Cell*. 167: 293-297.
3. Neul JL, Kaufmann WE, Glaze DG. et al. (2010). Rett syndrome: revised diagnostic criteria and nomenclature. *Ann. Neurol*. 68: 944-950.
4. Vorsanova GS, Iourov YI, Yurov BY. (2004). Neurological, genetic and epigenetic features of Rett syndrome. *J. Ped. Neurol*. 2: 179-190.
5. Fehr S, Bebbington A, Nassar N. et al. (2011). Trends in the diagnosis of Rett syndrome in Australia. *Pediatr. Res*. 70: 313-319.
6. Bienvenu T, Carrie A, de Roux N. et al. (2000). MECP2 mutations account for most cases of typical forms of Rett syndrome. *Human Molecular Genetics*. 9: 1377-1384.
7. Evans JC, Archer HL, Colley JP et al. (2005). Early onset seizures and Rett-like features associated with mutations in CDKL5. *European Journal of Human Genetics*. 13: 1113–1120.
8. Philippe C, Amsallem D, Francannet C. et al. (2010). Phenotypic variability in Rett syndrome associated with FOXP1 mutations in females. *Journal of Medical Genetics*. 47: 59–65.
9. Lucariello M, Vidal E, Vidal S. et al. (2016). Whole exome sequencing of Rett syndrome-like patients reveals the mutational diversity of the clinical phenotype. *Hum. Genet*. 135: 1343-1354.
10. Lewis JD, Meehan RR, Henzel WJ. *et al.* (1992). Purification, sequence, and cellular localization of a novel chromosomal protein that binds to methylated DNA. *Cell*. 69: 905-14.
11. Guy J, Gan J, Selfridge J. et al. (2007). Reversal of neurological defects in a mouse model of Rett syndrome. *Science*. 315: 1143-1147.

12. Katz DM, Bird A, Coenraads M. et al. (2016). Rett Syndrome: Crossing the Threshold to Clinical Translation. *Trends Neurosci.* 39: 100-113.
13. Stefanelli G, Gandaglia A, Costa M. et al. (2016). Brain phosphorylation of MeCP2 at serine 164 is developmentally regulated and globally alters its chromatin association. *Sci. Rep.* 2016 Jun 21; 6:28295.
14. Skene PJ, Illingworth RS, Webb S. et al. (2010). Neuronal MeCP2 is expressed at near histone-octamer levels and globally alters the chromatin state. *Mol. Cell.* 37: 457-468.
15. Witteveen JS, Willemsen MH, Dombroski TC. et al. (2016). Haploinsufficiency of MeCP2-interacting transcriptional co-repressor SIN3A causes mild intellectual disability by affecting the development of cortical integrity. *Nat Genet.* 2016 Jul 11.1-11.
16. Nott A, Cheng J, Gao F. et al. (2016). Histone deacetylase 3 associates with MeCP2 to regulate FOXO and social behavior. *Nat. Neurosci.* 19: 1497-1505.
17. Shah RR, Bird AP. (2017) MeCP2 mutations: progress towards understanding and treating Rett syndrome. *Genome Med.* 9: 17.
18. Zylka MJ, Simon JM, Philpot BD. (2015). Gene length matters in neurons. *Neuron.* 286: 353-355.
19. Gabel HW, Kinde B, Stroud H. et al. (2015). Disruption of DNA-methylation-dependent long gene repression in Rett syndrome. *Nature.* 522: 89-93.
20. Meng X, Wang W, Lu H. et al. (2016). Manipulations of MeCP2 in glutamatergic neurons highlight their contributions to Rett and other neurological disorders. *Elife.* 21; 5. pii: e14199.
21. Ure K, Lu H, Wang W. et al. (2016). Restoration of Mecp2 expression in GABAergic neurons is sufficient to rescue multiple disease features in a mouse model of Rett Syndrome. *Elife.* 21; 5. pii: e14198.

- 1  
2  
3 22. Gibson JH, Williamson SL, Arbuckle S & Christodoulou J. (2005). X chromosome  
4 inactivation patterns in brain in Rett syndrome: Implications for the disease phenotype. *Brain*  
5 *Development*. 27: 266–270.  
6  
7  
8  
9 23. Xinhua B, Shengling J, Fuying S, Hong P, Meirong L. & Wu XR. (2008). X chromosome  
10 inactivation in Rett Syndrome and its correlations with MECP2 mutations and phenotype.  
11 *Journal of Child Neurology*. 23: 22–25.  
12  
13  
14  
15 24. Leonard H, Cobb S, Downs J. (2017). Clinical and biological progress over 50 years in  
16 Rett syndrome. *Nat. Rev. Neurol*. 13: 37-51.  
17  
18  
19  
20 25. Dolce A, Ben-Zeev B, Naidu S, Kossoff EH. (2013). Rett syndrome and epilepsy: an  
21 update for child neurologists. *Pediatr. Neurol*. 48: 337-345.  
22  
23  
24 26. Knight VM, Horn PS, Gilbert DL, Standridge SM. (2016). The Clinical Predictors That  
25 Facilitate a Clinician's Decision to Order Genetic Testing for Rett Syndrome. *Pediatr. Neurol*.  
26 63: 66-70.  
27  
28  
29  
30 27. Christodoulou J, Grimm A, Maher T, Bennetts B. RettBASE. (2003). The IRSA MECP2  
31 variation database-a new mutation database in evolution. *Hum. Mutat*. 21: 466-472.  
32  
33  
34 28. Louise S, Fyfe S, Bebbington A. et al. (2009). InterRett, a model for international data  
35 collection in a rare genetic disorder. *Research in Autism Spectrum Disorders*. 2009 3(3).  
36  
37  
38 29. Sampieri K, Meloni I, Scala E. et al. (2007). Italian Rett database and biobank. *Human*  
39 *Mutation*. 28: 329-335.  
40  
41  
42  
43 30. Grillo E, Villard L, Clarke A, et al. (2012). Rett networked database: an integrated  
44 clinical and genetic network of Rett syndrome databases. *Human Mutation*. 33: 1031-6.  
45  
46  
47 31. Percy AK, Lane JB, Childers J et al. (2007). Rett syndrome: North American database.  
48 *Journal Child Neurology*. 22: 1338-41.  
49  
50  
51 32. Percy A, Neul J, Glaze D. et al. (2010). Rett syndrome diagnostic criteria: Lessons from  
52 the Natural History Study. *Ann Neurol*. 68: 951–955.  
53  
54  
55  
56  
57  
58

- 1  
2  
3 33. Itoh M, Saikusa T, Tanioka T. et al. (2016). A study of Methyl-CpG Binding Protein 2  
4 mutations and locomotion ability; Consideration from Japanese Rett Syndrome Database.  
5 Rett Syndrome – RTT50.1. *Wiener Medizinische Wochenschrift* 11-12.  
6  
7  
8  
9 34. Lang AE, Eberly S, Goetz CG et al. (2013). Movement disorder society unified Parkinson  
10 disease rating scale experiences in daily living: longitudinal changes and correlation with  
11 other assessments. *Mov. Disord.* 28: 1980-1986.  
12  
13  
14  
15 35. Shapiro EG, Nestrasil I, Ahmed A. et al. (2015). Quantifying behaviors of children with  
16 Sanfilippo syndrome: the Sanfilippo Behavior Rating Scale. *Mol. Genet. Metab.* 114: 594-  
17 598.  
18  
19  
20  
21  
22 36. FitzGerald PM, Jankovic J. & Percy AK. (1990). Rett syndrome and associated  
23 movement disorders. *Mov. Disord.* 5: 195–202.  
24  
25  
26 37. Tarquinio DC, Motil KJ, Hou W. et al. (2012). Growth failure and outcome in Rett  
27 syndrome: specific growth references. *Neurology* 79: 1653–1661.  
28  
29  
30  
31 38. Mount RH, Charman T, Hastings RP, Reilly S, Cass H (2002). The Rett Syndrome  
32 Behaviour Questionnaire (RSBQ): Refining the behavioural phenotype of Rett syndrome. *J.*  
33 *Child. Psychol. Psychiatry* 43: 1099–1110.  
34  
35  
36  
37 39. Esbensen AJ, Rojahn J, Aman MG, Ruedrich S (2003). Reliability and validity of an  
38 assessment instrument for anxiety, depression, and mood among individuals with mental  
39 retardation. *J. Autism Dev. Disord.* 33: 617–629.  
40  
41  
42  
43 40. Kerr A. M., Nomura Y., Armstrong D., et al. (2001). Guidelines for reporting clinical  
44 features in cases with MECP2 mutations. *Brain & Development.* 23: 208–211.  
45  
46  
47  
48 41. Pini G, Congiu L, Benincasa A. et al. (2016). Illness Severity, Social and Cognitive  
49 Ability, and EEG Analysis of Ten Patients with Rett Syndrome Treated with Mecasermin  
50 (Recombinant Human IGF-1). *Autism Res. Treat.* Epub 2016 Jan 26.  
51  
52  
53  
54  
55  
56  
57  
58



- 1  
2  
3 42. Kaufmann WE, Tierney E, Rohde CA. et al. (2012). Social impairments in Rett  
4 syndrome: Characteristics and relationship with clinical severity. *J. Intellect. Disabil. Res.* 56:  
5 233–247.  
6  
7  
8  
9 43. Tarquinio DC, Hou W, Berg et al. (2017). Longitudinal course of epilepsy in Rett  
10 syndrome and related disorders. *Brain.* 140: 306-318.  
11  
12  
13 44. Neul JL, Glaze DG, Percy AK. et al. (2015). Improving Treatment Trial Outcomes for  
14 Rett Syndrome: The Development of Rett-specific Anchors for the Clinical Global  
15 Impression Scale. *J. Child Neurol.* 30: 1743-1748.  
16  
17  
18 45. Lane JB, Lee HS, Smith LW. et al. (2011). Clinical severity and quality of life in children  
19 and adolescents with Rett syndrome. *Neurology.* 77: 1812-1818.  
20  
21  
22 46. Djukic A, Holtzer R, Shinnar S. et al. (2016). Pharmacologic Treatment of Rett Syndrome  
23 With Glatiramer Acetate. *Pediatr. Neurol.* 61: 51-57.  
24  
25  
26 47. Khwaja OS, Ho E, Barnes KV. et al. (2014). Safety, pharmacokinetics, and preliminary  
27 assessment of efficacy of mecasermin (recombinant human IGF-1) for the treatment of Rett  
28 syndrome. *Proc. Natl. Acad. Sci. U S A.* 111: 4596-4601.  
29  
30  
31 48. <https://www.clinicaltrials.gov/ct2/show/NCT02790034?term=newron&rank=2> (accessed  
32 25 February 2017).  
33  
34  
35 49. Kolevzon A, Bush L, Wang AT. et al. (2014). A pilot controlled trial of insulin-like  
36 growth factor-1 in children with Phelan-McDermid syndrome. *Mol. Autism.* 5: 54.  
37  
38  
39 50. Naidu S, Johnston MV. (2011). Neurodevelopmental disorders: Clinical criteria for Rett  
40 syndrome. *Nat. Rev. Neurol.* 7: 312-314.  
41  
42  
43 51. Robertson L, Hall SE, Jacoby P. et al. (2006). The association between behavior and  
44 genotype in Rett syndrome using the Australian Rett Syndrome Database. *Am. J. Med.*  
45 *Genet. B. Neuropsychiatr Genet.* 141B (2): 177-183.  
46  
47  
48  
49  
50  
51  
52  
53  
54  
55  
56  
57  
58  
59  
60

- 1  
2  
3 52. Barnes KV, Coughlin FR, O'Leary HM. et al. (2015). Anxiety-like behavior in Rett  
4 syndrome: characteristics and assessment by anxiety scales. *J. Neurodev. Disord.* 7(1): 30.  
5  
6  
7 53. Downs J, Stahlhut M, Wong K. et al. (2016). Validating the Rett Syndrome Gross Motor  
8 Scale. *PLoS One.* 11: e0147555.  
9  
10  
11 54. Bebbington A, Anderson A, Ravine D. et al. (2008). Investigating genotype-phenotype  
12 relationships in Rett syndrome using an international data set. *Neurology.* 70: 868–875.  
13  
14  
15 55. Neul JL, Fang P, Barrish J. (2008), et al. Specific mutations in methyl-CpG-binding  
16 protein 2 confer different severity in Rett syndrome. *Neurology.* 70 (16 Part 1):1313–1321.  
17  
18  
19 56. Halbach N, Smeets EE, Julu P. et al. (2016). Neurophysiology versus clinical genetics in  
20 Rett syndrome: A multicenter study. *Am. J. Med. Genet A.* 170: 2301-2309.  
21  
22  
23 57. Santosh PJ, Bell L, Fiori F, Singh J. (2016). Pediatric Antipsychotic Use and Outcomes  
24 Monitoring. *J. Child Adolesc. Psychopharmacol.* Sep 8.  
25  
26  
27 58. Singh J and Santosh P (2017). Psychopharmacology of Neurodevelopmental Disorders in  
28 Children, pp. 325-362 in *Child and Adolescent Psychiatry: Asian Perspectives.* Edition 1,  
29 Springer. Nature.  
30  
31  
32 59. Santosh PJ, Bell L, Lievesley K, Singh J, Fiori F (2016). Paradoxical Physiological  
33 Responses to Propranolol in a Rett Syndrome Patient: A Case Report. *BMC Paediatrics*  
34 29;16: 194.  
35  
36  
37 60. Julu PO, Kerr AM, Hansen S. et al. (1997). Functional evidence of brain stem immaturity  
38 in Rett syndrome. *Eur. Child Adolesc. Psychiatry.* 6 Suppl 1: 47-54.  
39  
40  
41 61. Julu PO, Kerr AM, Apartopoulos F. et al. (2001). Characterisation of breathing and  
42 associated central autonomic dysfunction in the Rett disorder. *Arch Dis. Child.* 85: 29–37.  
43  
44  
45 62. Julu PO & Witt Engerstrom I. (2005). Assessment of the maturity-related brainstem  
46 functions reveals the heterogeneous phenotypes and facilitates clinical management of Rett  
47 syndrome. *Brain & Development.* 27 (Suppl. 1): S43–S53.  
48  
49  
50  
51  
52  
53  
54  
55  
56  
57  
58  
59

- 1  
2  
3 63. Julu PO, Engerström IW, Hansen S (2008). Cardiorespiratory challenges in Rett's  
4 syndrome. *Lancet*. 371: 1981-1983.  
5  
6  
7 64. US Department of Health and Human Services Food and Drug Administration. Guidance  
8 for industry: patient-reported outcome measures: use in medical product development to  
9 support labelling claims. Secondary Guidance for industry: patient-reported outcome  
10 measures: use in medical product development to support labelling claims. 2009.  
11 <http://www.fda.gov/downloads/Drugs/GuidanceComplianceRegulatoryInformation/Guidance>  
12 [s/UCM193282.pdf](http://www.fda.gov/downloads/Drugs/GuidanceComplianceRegulatoryInformation/Guidance)  
13  
14  
15 65. Santosh P, Tarver J, Gibbons F. et al. (2016). Protocol for the development and validation  
16 of a questionnaire to assess concerning behaviours and mental health in individuals with  
17 autism spectrum disorders: the Assessment of Concerning Behaviour (ACB) scale. *BMJ*  
18 *Open*. 6: e010693.  
19  
20 66. Liberati A, Altman DG, Tetzlaff J. et al. (2009). The PRISMA statement for reporting  
21 systematic reviews and meta-analyses of studies that evaluate health care interventions:  
22 explanation and elaboration. *Annals of Internal Medicine*. 151: W-65.  
23  
24  
25 67. <https://www.healthtracker.co.uk>  
26  
27  
28 68. Santosh P. STOP study aims to monitor suicidality. (2014) *EU Research* 36–39.  
29  
30 69. [http://cordis.europa.eu/project/rcn/110200\\_en.html](http://cordis.europa.eu/project/rcn/110200_en.html) (accessed 25 February 2017)  
31  
32  
33 70. Santosh P, Gringras P, Baird G. et al. (2015). Development and psychometric properties  
34 of the parent version of the Profile of Neuropsychiatric Symptoms (PONS) in children and  
35 adolescents. *BMC Pediatrics* 15: 62.  
36  
37  
38 71, Lilford RJ, Thornton JG, Braunholtz D. (1995). Clinical trials and rare diseases: a way  
39 out of a conundrum. *BMJ* 311: 1621–1625.  
40  
41  
42  
43  
44  
45  
46  
47  
48  
49  
50  
51  
52  
53  
54  
55  
56  
57  
58  
59  
60

- 1  
2  
3 72. Hampson LV, Whitehead J, Eleftheriou D. et al. (2015). Elicitation of expert prior  
4 opinion: application to the MYPAN trial in childhood polyarteritis nodosa. PLoS One. 30;  
5 10: e0120981.  
6  
7  
8  
9 73. Theoharides TC, Athanassiou M, Panagiotidou S, Doyle R. (2015). Dysregulated brain  
10 immunity and neurotrophin signaling in Rett syndrome and autism spectrum disorders. J.  
11 Neuroimmunol. 279: 33-38.  
12  
13  
14  
15 74. Neul, J.L. The relationship of Rett syndrome and MECP2 disorders to autism. (2012).  
16 Dialogues Clin. Neurosci. 14, 253–262.  
17  
18  
19 75. Carter JC, Lanham DC, Pham D. et al. (2008). Selective cerebral volume reduction in  
20 Rett syndrome: a multiple-approach MR imaging study. AJNR Am. J Neuroradiol. 29: 436-  
21 441.  
22  
23  
24  
25  
26 76. Goodman R, Ford T, Richards H. et al. (2000). The Development and Well-Being  
27 Assessment: description and initial validation of an integrated assessment of child and  
28 adolescent psychopathology. J. Child Psychol. Psychiatry 41: 645–655.  
29  
30  
31  
32 77. <http://www.proteus.com/> (accessed 25 February 2017)  
33  
34 78. <https://clinicaltrials.gov/ct2/show/NCT02447952> (accessed 25 February 2017)  
35  
36  
37 79. Weese-Mayer DE, Lieske SP, Boothby CM. et al. (2006). Autonomic nervous system  
38 dysregulation: breathing and heart rate perturbation during wakefulness in young girls with  
39 Rett syndrome. Pediatr Res. 60: 443-449.  
40  
41  
42  
43 80. Weese-Mayer DE, Lieske SP, Boothby CM. et al. (2008). Autonomic dysregulation in  
44 young girls with Rett Syndrome during night-time in-home recordings. Pediatr. Pulmonol.  
45 43: 1045-1060.  
46  
47  
48  
49 81. Tarvainen MP, Niskanen JP, Lipponen JA. et al. (2014). Kubios HRV--heart rate  
50 variability analysis software. Comput. Methods Programs Biomed. 113: 210-220.  
51  
52  
53  
54  
55  
56  
57  
58  
59  
60

- 1  
2  
3 82. Benedek M, Kaernbach C. (2010). A continuous measure of phasic electrodermal  
4 activity. *J. Neurosci. Methods.* 190: 80-91.  
5  
6  
7 83. Bauer A, Kantelhardt WJ, Bunde A. et al. (2006). Phase-rectified signal averaging detects  
8 quasi-periodicities in non-stationary data. *Physica A: Statistical Mechanics and its*  
9 *Applications.* 364: 423-434.  
10  
11  
12 84. Braun V. & Clarke V. (2006). Using thematic analysis in psychology. *Qualitative*  
13 *Research in Psychology.* 3: 77-101.  
14  
15  
16 85. Portney LG, Watkins MP. (2009). *Foundations of clinical research: Applications to*  
17 *practice.* 3rd ed. Upper Saddle River, N.J.: Pearson/Prentice Hall.  
18  
19  
20  
21 86. Weir JP. (2005). Quantifying test-retest reliability using the intraclass correlation  
22 coefficient and the SEM. *Journal of Strength and Conditioning Research / National Strength*  
23 *& Conditioning Association.* 19: 231–240.  
24  
25  
26 87. MacCallum RC. & Austin JT. (2000). Applications of structural equation modeling in  
27 psychological research. *Annual Review of Psychology.* 51, 201–226.  
28  
29  
30  
31 88, de Winter JCF, Dodou, D, Wieringa PA (2009). Exploratory Factor Analysis with small  
32 sample sizes. *Multivariate Behavioral Research.* 44: 147–181.  
33  
34  
35  
36 89. Rouquette A. & Falissard B. (2011). Sample size requirements for the internal validation  
37 of psychiatric scales. *International Journal of Methods in Psychiatric Research.* 20: 235-249.  
38  
39  
40  
41 90. Jung S & Soonmook K. (2011). Exploratory factor analysis for small samples. *Behaviour*  
42 *Res.* 43: 701-709.  
43  
44  
45  
46 91. Vindras P, Desmurget M, Baraduc P. (2012). When One Size Does Not Fit All: A Simple  
47 Statistical Method to Deal with Across-Individual Variations of Effects. *PLoS One.* 7:  
48 e39059.  
49  
50  
51  
52  
53  
54  
55  
56  
57  
58  
59  
60

1  
2  
3 Figure 1: Flow diagram illustrating the sequence of steps showing how data obtained from  
4 the TRIAL database can be used to provide timely intervention to streamline treatment  
5 outcomes in patients with RTT syndrome  
6  
7  
8  
9

10 **INSERT FIGURE 1 HERE**  
11  
12

13 Abbreviations: REST (Rett Evaluation of Symptoms and Treatments) questionnaire; RTT (Rett Syndrome);  
14 TRIAL (Tailored Rett Intervention and Assessment Longitudinal) database  
15

16 Notes:

17 The term 'wearables' has been coined for wearable sensor technology

18 Genetic and psychosocial information will be captured as part of the REST questionnaire  
19  
20  
21  
22  
23  
24  
25  
26  
27  
28  
29  
30  
31  
32  
33  
34  
35  
36  
37  
38  
39  
40  
41  
42  
43  
44  
45  
46  
47  
48  
49  
50  
51  
52  
53  
54  
55  
56  
57  
58  
59  
60

Table 1: Measures to be administered during Stage 2 (Validation) and Stage 3 (Wearable Sensor Technology) of the Study

| Measure                                                         | Key Information                                                                                                                                                                                                                                                                                                                                       | Administered to:    |                     |                  |                                     |                                             |                      |
|-----------------------------------------------------------------|-------------------------------------------------------------------------------------------------------------------------------------------------------------------------------------------------------------------------------------------------------------------------------------------------------------------------------------------------------|---------------------|---------------------|------------------|-------------------------------------|---------------------------------------------|----------------------|
|                                                                 |                                                                                                                                                                                                                                                                                                                                                       | Individual with RTT | Individual with ASD | Healthy Subjects | Parent/Carer of Child with RTT/*ASD | Parent/Carer/Partner of Adult with RTT/ASD* | Clinician/Researcher |
| Rett Natural History study <sup>32</sup>                        | More than 1000 participants with RTT providing information on important aspects of disorder symptomatology                                                                                                                                                                                                                                            |                     |                     |                  |                                     |                                             | X                    |
| Rett Syndrome Behavioural Questionnaire (RSBQ) <sup>38</sup>    | Provides an accurate measure of the behavioural features of RTT                                                                                                                                                                                                                                                                                       |                     |                     |                  | X                                   | X                                           |                      |
| Rett Syndrome Severity Score (RSSS) <sup>42</sup>               | Provides information on the overall clinical severity and severity across individual parameters: <ul style="list-style-type: none"> <li>• frequency and manageability of seizures;</li> <li>• respiratory abnormalities</li> <li>• scoliosis;</li> <li>• ability to walk;</li> <li>• hand use;</li> <li>• speech;</li> <li>• sleep hygiene</li> </ul> |                     |                     |                  |                                     |                                             | X                    |
| Rett Evaluation of Symptoms and Treatments (REST) questionnaire | A multidimensional questionnaire that can capture clinically meaningful data across the lifespan in individuals with RTT and improve treatment pathways                                                                                                                                                                                               |                     |                     |                  | X                                   | X                                           | X                    |
| Wearable Sensor Technology                                      | Captures real-time biometric physiological data (heart rate variability, skin conductance, blood volume pressure, perspiration and temperature)                                                                                                                                                                                                       | X                   | X                   | X                |                                     |                                             |                      |
| Anticipated                                                     |                                                                                                                                                                                                                                                                                                                                                       | 30                  | 30                  | 30               | ~60                                 | ~60                                         | ~60                  |

1  
2  
3  
4  
5  
6  
7  
8  
9  
10  
11  
12  
13  
14  
15  
16  
17  
18  
19  
20  
21  
22  
23  
24  
25  
26  
27  
28  
29  
30  
31  
32  
33  
34  
35  
36  
37  
38  
39  
40  
41  
42  
43  
44  
45  
46  
47

|                               |  |  |  |  |  |  |  |
|-------------------------------|--|--|--|--|--|--|--|
| Administration Time (minutes) |  |  |  |  |  |  |  |
|-------------------------------|--|--|--|--|--|--|--|

\* Participants in the ASD cohort will be asked to complete only the relevant questions in the questionnaire battery that would be applicable and relevant to them  
 Abbreviations: ASD (Autism Spectrum Disorder); REST (Rett Evaluation of Symptoms and Treatments) questionnaire; RSBQ (Rett Syndrome Behavioural Questionnaire); RSSS (Rett Syndrome Severity Score); RTT (Rett Syndrome)

For peer review only





Figure 1: Flow diagram illustrating the sequence of steps showing how data obtained from the TRIAL database can be used to provide timely intervention to streamline treatment outcomes in patients with RTT syndrome

Abbreviations: REST (Rett Evaluation of Symptoms and Treatments) questionnaire; RTT (Rett Syndrome); TRIAL (Tailored Rett Intervention and Assessment Longitudinal) database

Notes:

The term 'wearables' has been coined for wearable sensor technology  
Genetic and psychosocial information will be captured as part of the REST questionnaire

1  
2  
3  
4  
5  
6  
7  
8  
9  
10  
11  
12  
13  
14  
15  
16  
17  
18  
19  
20  
21  
22  
23  
24  
25  
26  
27  
28  
29  
30  
31  
32  
33  
34  
35  
36  
37  
38  
39  
40  
41  
42  
43  
44  
45  
46  
47  
48  
49  
50  
51  
52  
53  
54  
55  
56  
57  
58  
59  
60

190x254mm (300 x 300 DPI)

For peer review only
